# Supplementary material for: Dog ownership, the natural outdoor environment and health: a cross-sectional study
Source: PubMed Central journal article supplement — BMJ Open. 2019 May 27;9(5):e023000. doi: 10.1136/bmjopen-2018-023000 (PMC6549751; doi:10.1136/bmjopen-2018-023000), 2019-05-27
Supplement: bmjopen-2018-023000.draft_revisions.pdf [file bmjopen-2018-023000.draft_revisions.pdf]

# BMJ Open

BMJ Open is committed to open peer review. As part of this commitment we make the peer review history of every article we publish publicly available.

When an article is published we post the peer reviewers' comments and the authors' responses online. We also post the versions of the paper that were used during peer review. These are the versions that the peer review comments apply to.

The versions of the paper that follow are the versions that were submitted during the peer review process. They are not the versions of record or the final published versions. They should not be cited or distributed as the published version of this manuscript.

BMJ Open is an open access journal and the full, final, typeset and author-corrected version of record of the manuscript is available on our site with no access controls, subscription charges or pay-per-view fees (<http://bmjopen.bmj.com>).

If you have any questions on BMJ Open's open peer review process please email [info.bmjopen@bmj.com](mailto:info.bmjopen@bmj.com)

# BMJ Open

## Interactions between dog ownership, the natural outdoor environment and health: a cross-sectional study

|                               |                                                                                                                                                                                                                                                                                                                                                                                                                                                                                                                                                                                                                                                                                                                                                                                                                                                                                                                                                                                                                                                                                                                                                                                                                                                                                                         |
|-------------------------------|---------------------------------------------------------------------------------------------------------------------------------------------------------------------------------------------------------------------------------------------------------------------------------------------------------------------------------------------------------------------------------------------------------------------------------------------------------------------------------------------------------------------------------------------------------------------------------------------------------------------------------------------------------------------------------------------------------------------------------------------------------------------------------------------------------------------------------------------------------------------------------------------------------------------------------------------------------------------------------------------------------------------------------------------------------------------------------------------------------------------------------------------------------------------------------------------------------------------------------------------------------------------------------------------------------|
| Journal:                      | <i>BMJ Open</i>                                                                                                                                                                                                                                                                                                                                                                                                                                                                                                                                                                                                                                                                                                                                                                                                                                                                                                                                                                                                                                                                                                                                                                                                                                                                                         |
| Manuscript ID                 | bmjopen-2018-023000                                                                                                                                                                                                                                                                                                                                                                                                                                                                                                                                                                                                                                                                                                                                                                                                                                                                                                                                                                                                                                                                                                                                                                                                                                                                                     |
| Article Type:                 | Research                                                                                                                                                                                                                                                                                                                                                                                                                                                                                                                                                                                                                                                                                                                                                                                                                                                                                                                                                                                                                                                                                                                                                                                                                                                                                                |
| Date Submitted by the Author: | 22-Mar-2018                                                                                                                                                                                                                                                                                                                                                                                                                                                                                                                                                                                                                                                                                                                                                                                                                                                                                                                                                                                                                                                                                                                                                                                                                                                                                             |
| Complete List of Authors:     | Zijlema, Wilma; Instituto de Salud Global Barcelona, Christian, Hayley; The University of Western Australia, School of Population Health<br>Triguero-Mas, Margarita; Instituto de Salud Global Barcelona<br>Cirach, Marta; Instituto de Salud Global Barcelona<br>van den Berg, Magdalena; EMGO Institute for Health and Care Research, VU University Medical Center<br>Mass, Jolanda; Vrije Universiteit Amsterdam, Department of Clinical Psychology<br>Gidlow, Christopher; Staffordshire University, Centre for Sport, Health and Exercise Research<br>Kruize, Hanneke; National Institute for Public Health and the Environment,, Centre of Environmental Health Research<br>Wendel-Vos, Wanda; National Institute for Public Health and the Environment,<br>Andrušaitytė, Sandra; 7. Department of Environmental Sciences, Vytautas Magnus University, Kaunas, Lithuania<br>Grazuleviciene, Regina; Vytauto Didziojo Universitetas, Department of Environmental Sciences<br>Litt, Jill; University of Colorado Boulder, Environmental Studies Program<br>Nieuwenhuijsen, Mark; Instituto de Salud Global de Barcelona (ISGlobal), Centre for International Health Research (CRESIB); Instituto de Salud Global de Barcelona (ISGlobal), Centre for Research in Environmental Epidemiology (CREAL) |
| Keywords:                     | EPIDEMIOLOGY, PUBLIC HEALTH, MENTAL HEALTH                                                                                                                                                                                                                                                                                                                                                                                                                                                                                                                                                                                                                                                                                                                                                                                                                                                                                                                                                                                                                                                                                                                                                                                                                                                              |
|                               |                                                                                                                                                                                                                                                                                                                                                                                                                                                                                                                                                                                                                                                                                                                                                                                                                                                                                                                                                                                                                                                                                                                                                                                                                                                                                                         |

SCHOLARONE™  
Manuscripts

1  
2  
3 Title4 Interactions between dog ownership, the natural outdoor environment and health: a cross-sectional study  
5  
6

## 7 Authors

8  
9 Wilma L Zijlema<sup>abc\*</sup>, Hayley Christian<sup>d</sup>, Margarita Triguero-Mas<sup>abc</sup>, Marta Cirach<sup>abc</sup>, Magdalena van den  
10 Berg<sup>e</sup>, Jolanda Maas<sup>f</sup>, Christopher Gidlow<sup>g</sup>, Hanneke Kruize<sup>h</sup>, Wanda Wendel-Vos<sup>i</sup>, Sandra Andrusaityte<sup>j</sup>,  
11 Regina Grazuleviciene<sup>j</sup>, Jill Litt<sup>h</sup>, Mark J. Nieuwenhuijsen<sup>abc</sup>  
12  
13  
14

## 15 Affiliations

16  
17  
18 <sup>a</sup> Barcelona Institute for Global Health (ISGlobal), Doctor Aiguader 88, 08003 Barcelona, Spain  
1920  
21 <sup>b</sup> Universitat Pompeu Fabra (UPF), Doctor Aiguader 88, 08003 Barcelona, Spain  
2223  
24 <sup>c</sup> CIBER Epidemiología y Salud Pública (CIBERESP), Melchor Fernández Almagro, 3-5, 28029 Madrid,  
25 Spain  
2627  
28 <sup>d</sup> School of Population and Global Health, The University of Western Australia, 35 Stirling Highway,  
29 Crawley, 6009, Perth, Australia  
3031  
32  
33 <sup>e</sup> Department of Public & Occupational Health and EMGO Institute for Health and Care research, VU  
34 University Medical Center, Amsterdam, the Netherlands  
3536  
37  
38 <sup>f</sup> Department of Clinical Psychology, Vrije Universiteit Amsterdam, Van der Boechorstraat 1, 1081 BT  
39 Amsterdam, Netherlands  
4041  
42 <sup>g</sup> Centre for Health and Development, Staffordshire University, Leek Road, Stoke-on-Trent, ST4 7EP,  
43 United Kingdom  
4445  
46  
47 <sup>h</sup> Center for Sustainability, Environment and Health, National Institute for Public Health and the  
48 Environment (RIVM), Antonie van Leeuwenhoeklaan 9, 3721 MA Bilthoven, The Netherlands  
4950  
51 <sup>i</sup> Centre for Nutrition, Prevention and Health Services, National Institute for Public Health and the  
52 Environment (RIVM), Antonie van Leeuwenhoeklaan 9, 3721 MA Bilthoven, The Netherlands  
53  
54  
55  
56  
57

1  
2  
3 <sup>j</sup> Department of Environmental Sciences, Vytautas Magnus University, K. Donelaicio str. 58, 44248  
4  
5 Kaunas, Lithuania

6  
7 <sup>h</sup> Environmental Studies Program, University of Colorado Boulder, 4001 Discovery Drive, Boulder, CO  
8  
9 80303, United States.

10  
11  
12  
13  
14 \*Corresponding author

15 Wilma L Zijlema PhD

16  
17 Barcelona Institute for Global Health (ISGlobal)

18  
19 Barcelona Biomedical Research Park (PRBB)

20  
21 Doctor Aiguader 88, 08003 Barcelona, Spain

22  
23 Tel: +34 932147300, Fax: +34 93 214 73 02, E-mail: [wilma.zijlema@isglobal.org](mailto:wilma.zijlema@isglobal.org)

## Abstract

### Objectives

Dog owners may receive additional health benefits as a result of walking in natural outdoor environments (NOE), but this is unknown. We investigated associations between dog ownership, walking, time spent in NOE, and health and whether these associations differed among those with better access to NOE.

### Design

#### Cross-sectional study

#### Setting

The Positive Health Effects of the Natural Outdoor Environment in Typical Populations in Different Regions in Europe (PHENOTYPE) project.

#### Participants

3586 included adults from Barcelona (Spain), Doetinchem (the Netherlands), Kaunas (Lithuania), and Stoke-on-Trent (United Kingdom).

#### Data collection and analysis

We calculated access (distance, amount, and size) to NOE with land maps and surrounding greenness with satellite data. Leisure time walking, time spent in NOE, and general and mental health status were measured using validated questionnaires. Associations were estimated using multilevel analysis with a random intercept defined at the city and neighborhood level.

### Results

Dog ownership was associated with higher odds of above median leisure time walking (odds ratio (OR) = 2.13, 95% confidence interval (CI) 1.82, 2.50) and above median time spent in NOE (OR= 2.42, 95% CI 2.05, 2.86). In general, better access to NOE was associated with more walking and time spent in NOE in dog owners compared with non-dog owners. No consistent associations were found between dog ownership and general or mental health status.

### Conclusions

1  
2  
3 Compared with non-dog owners, dog owners walked more and spent more time in NOE, especially when  
4 the number of NOE around the residence was greater. The general and mental health implications of these  
5 relationships should be further investigated. In a largely physically inactive society where many people  
6 remain indoors, dog walking in NOE may be a simple way of promoting physical activity and health.  
7  
8  
9

#### 10 11 12 13 14 Strengths and limitations

- 15  
16 • We cannot establish the direction of the observed relationships because of the cross-sectional  
17 study design.
- 18  
19 • We had no detailed information about dog ownership (e.g. level of attachment, duration of dog  
20 ownership, primary caretaker) and we did not know if the time spent in natural outdoor  
21 environments and leisure time walking was undertaken together with the dog.
- 22  
23 • This is one of the first studies from mainland Europe, and the multi-city approach revealed  
24 differences between cities concerning dog ownership and health.
- 25  
26 • The assessment of access to natural outdoor environments suitable for physical activity using  
27 road network buffers was chosen to optimally capture the relation with people's walking  
28 behavior.
- 29  
30 • The use of multiple exposure indicators of natural outdoor environments enabled studying these  
31 exposure indicators simultaneously, and could help understand what metric best predicts the  
32 health benefits associated with natural outdoor environments.  
33  
34  
35  
36  
37  
38  
39  
40  
41  
42  
43

#### 44 Competing interests

45  
46 None declared

#### 47 48 Funding

49  
50 This work was supported by the European Community's Seventh Framework Programme (FP7/2007-  
51 2013) under grant agreement no 282996. W.L. Zijlema is supported by a Sara Borrell grant from the  
52 Instituto de Salud Carlos III (CD17/00195). H. Christian is supported by an Australian National Heart  
53  
54  
55  
56  
57

1  
2  
3 Foundation Future Leader Fellowship (#100794). ISGlobal is a member of the CERCA Programme,  
4 Generalitat de Catalunya. The funders had no role in study design, data collection and analysis, decision  
5 to publish, or preparation of the manuscript.  
6  
7

#### 8 Author's Contributions

9  
10  
11 WLZ conducted the analyses. WLZ, HC and JL drafted the manuscript. MTM, MC, MB, JM, CG, HK,  
12 WWV, SA, RG, MJN were involved in the design of and data acquisition in the PHENOTYPE study. All  
13 authors provided input on the manuscript and agreed with the final version. The authors thank the  
14  
15 PHENOTYPE respondents for their contribution.  
16  
17

#### 18 Data sharing statement

19  
20  
21  
22 Additional data are available upon request from the corresponding author (WLZ:

23 [Wilma.zijlema@isglobal.org](mailto:Wilma.zijlema@isglobal.org)).

## INTRODUCTION

In an urbanized world, where people spend the majority of their time indoors [1], physical inactivity is a major public health problem [2]. It not only leads to adverse health effects but it is also a large economic burden for society [3]. Physical activity behavior is influenced by the built environment [4]. Aspects of the built environment such as the availability of parks are associated with increased physical activity, especially walking [5,6]. It is important to identify sustainable built environment interventions for increasing physical activity and improving health.

Dog walking has been identified as a simple way of promoting physical activity [7–9]. Dog owners walk more often and are more physically active than non-dog owners [10]. This association has been observed in adults [11,12], adolescents and children [13–15], and in groups with potential limited mobility such as older adults [16–18] and people with a chronic disease [19]. Consequently, dog walking may lead to better health over time, with benefits ranging from improved wellbeing [20] to fewer doctor visits [21] and a lower risk of cardiovascular disease and mortality [22].

Aspects of the built environment also seem to influence dog walking behavior [9]. Supportive environments, such as parks, are associated with higher physical activity levels of dog owners and are important for promoting dog walking [8,9]. Specifically, better park access and park quality (e.g. presence of dog litter bags, water sources) were related to dog walking [9,23,24]. Parks are important for facilitating dog walking because dog walking often takes place in parks around an owner's residence [25]. Parks also provide an opportunity for nature contact. Spending time in natural outdoor environments (NOE), such as parks, has been associated with health benefits, for example through facilitating stress reduction, restoration, and social contact [26–28]. Dog owners walking their dog in NOE may benefit from the physical activity facilitated by owning a dog as well as time spent in nature. However, it is unclear whether dog owners receive additional health benefits associated with having access to NOE.

The aim of this study was to investigate the relationships between dog ownership, walking, NOE and health. We hypothesized that dog owners walk more, spend more time in NOE and are healthier than non-dog owners, and that health benefits are more apparent in dog owners with high exposure to NOE. We investigated the association between dog ownership, leisure time walking, time spent in NOE, and general and mental health status, and whether these associations differed for respondents with varying exposure to NOE.



## METHOD

### Study design and participants

This study analyzed data from the Positive Health Effects of the Natural Outdoor environment in Typical Populations in different regions in Europe (PHENOTYPE) project. Respondents were recruited from 30 different neighborhoods in Barcelona (Spain), Doetinchem (the Netherlands), Kaunas (Lithuania), and Stoke-on-Trent (United Kingdom) [29]. Neighborhoods were selected to maximize variability in access to NOE and socioeconomic status. A random sample of 30-35 adults aged 18-75 were invited to participate, resulting in approximately 1000 respondents per city. Data were collected using interview-administered questionnaires (except in Kaunas, where self-administered questionnaires were used) at respondents' residences during May-November 2013. The study was conducted in accordance with the Declaration of Helsinki. All respondents provided written informed consent and study protocols were approved by local ethical committees. Participant and stakeholder involvement and dissemination of results was organized in multiple ways through symposia, workshops, online media channels and newsletters.

### Data

#### Dog ownership

Dog ownership was assessed using the question: "Do you own a dog" (yes; no).

#### Leisure time walking

Walking in leisure time was assessed by the following questions: "When thinking about a normal week in the past month how many days per week do you walk in your leisure time" and "How much time (minutes) per day do you spend walking in your leisure time". These items were derived from the short questionnaire to assess health-enhancing physical activity (SQUASH) [30]. The SQUASH is a valid measure of physical activity [30,31]. Duration and frequency of walking was multiplied to create a composite variable of minutes per week of leisure time walking. This composite variable was then dichotomized using the median (120 minutes/week) as a cut point. City-specific cut points were made for city-specific analyses (Barcelona: 120 min/week; Doetinchem: 120 min/week; Kaunas: 240 min/week; and Stoke-on-Trent: 20 min/week).

### Time spent in NOE

Time spent in NOE was assessed using two questions: “How often did you visit/go in the last 4 weeks on purpose to green or blue space near your home?” (5-point response scale ranging from ‘never’ (1) to ‘almost daily’ (5)); and “How much time did you spend in a green or blue space near your home?” (4-point response scale ranging from <1 h (1) to 6–10 h (4)). A composite variable was created to determine the amount of time (frequency of visits multiplied by average duration per visit) respondents spent in NOE near home per month. As frequency and duration were assessed with questions with categorical response scales, the central value of each answer category for frequency (e.g. <1 times/month was coded as 0.5 times/month) were multiplied with central value of each answer category for duration (e.g. <1 h/month was coded as 0.5 h/month). The composite variable was then dichotomized using the median (4 hours/month) as a cut point. City-specific cut points were made for city-specific analyses (Barcelona: 3.75 h/month; Doetinchem: 10 h/month; Kaunas: 4 h/month; and Stoke-on-Trent: 1 h/month).

### General health status

General health status was assessed using the question: “In general what would you say your health is?” (5 point response scale: excellent to poor), which was derived from the Medical Outcome Study Short Form (SF-36) [32]. Scores were dichotomized into “fair or poor” (0) and “excellent, very good, and good” (1). This single question has been found to be associated with poor health outcomes in the general population [33,34].

### Mental health

Mental health was assessed using the SF-36 mental health subscale, including five items (e.g. nervousness, depression), and is a valid and reliable measure of mental health [35]. Respondents rated the occurrence of symptoms in the past four weeks on a 6-point scale ranging from “all of the time” (1) to “none of the time” (6). A sum score was calculated and transformed into a scale ranging from 0 to 100 according to guidelines [32] with higher scores indicating better mental health. When  $\geq 3$  items were missing, respondents were excluded from the analyses, but when 1-2 items were missing, missing values were replaced by the average score of the other items. We did this for 17 respondents. Analyses including and excluding these 17 respondents did not alter the results.

### Characterization of NOE

1  
2  
3 *Residential surrounding greenness* was assessed using the normalized difference vegetation index  
4 (NDVI). The NDVI is a measure of vegetation and represents the photosynthetic activity in an area  
5 [36,37]. Healthy vegetation absorbs most visible light and reflects large parts of near-infrared light, while  
6 sparse vegetation reflects more visible light and less near-infrared light. Based on this distinction a value  
7 between -1 and +1 is calculated, with higher values indicating a higher density of green vegetation [37].  
8 The NDVI was derived from Landsat 5 and 8 satellite images at a resolution of 30 m × 30 m on cloud-  
9 free images within the greenest season (April to September) in the relevant period for this study (2011-  
10 2013). Average NDVI values were calculated within (Euclidean) buffers of 100m, 300m, and 500m  
11 around the residence, as used in previous research [38,39], and dichotomized using the median value.  
12  
13  
14  
15  
16  
17  
18  
19

20  
21 *Access to NOE* was estimated with land use maps from local sources in each city. Only NOE that were  
22 publically available; suitable for physical activity; and at least 0.5 hectare (e.g. parks, semi-natural/natural  
23 land, formal recreation grounds) or 0.25 hectare (natural/green corridors) were selected as these were  
24 relevant for physical activity [36] and therefore potentially relevant in terms of the health benefits of NOE  
25 for dog owners. Road network buffers were chosen over circular buffers in order to capture a more  
26 realistic measure of NOE accessibility on foot [40], which may be most relevant to dog walking. We  
27 furthermore used varying buffer sizes to obtain a better understanding of what distance to NOE is most  
28 beneficial to health [41]. Using GIS we constructed three indicators: (1) the number of, and (2) the total  
29 surface area NOE within road network buffers of 300m, 500m, and 1000m, and (3) the road network  
30 distance to the nearest NOE, all dichotomized using the median values.  
31  
32  
33  
34  
35  
36  
37  
38

#### 39 Covariates and other variables

40  
41 Information about sociodemographic factors included sex, age, educational level (primary school or no  
42 education; secondary school/ further education (up to 18 years); university degree or higher), household  
43 composition (alone; with partner (without children); with children <12 yr old; with children >12 yr old;  
44 and other), perceived income situation (cannot make ends meet; enough to get by; comfortable),  
45 frequency of contact with family and/or friends ((almost daily; ≥1 per week; 1-3 per month or less), and  
46 whether respondents feel part of a group of friends ((totally) agree; neutral, (totally) disagree). Home-  
47 related factors included perceived safety of neighborhood NOE (very satisfied; satisfied; neutral;  
48 dissatisfied; very dissatisfied), home ownership (yes; no), crowding index (rooms/person), housing type  
49 (detached; semi-detached; flat; other), and yard access (yes; no). Health-related factors included disability  
50  
51  
52  
53  
54  
55  
56  
57

1  
2  
3 restricting mobility (yes; no), one or more chronic diseases (yes; no), body mass index (based on self  
4 reported height and weight: healthy weight  $\leq 25$  kg/m<sup>2</sup>; overweight 25-30 kg/m<sup>2</sup>; obese  $>30$  kg/m<sup>2</sup>), and  
5 smoking status (current; former; never). Neighborhood socioeconomic status (SES, low; intermediate;  
6 high) was based on country-specific data (Barcelona: deprivation index based on census data 2001 [42];  
7 Doetinchem: average monthly household income per 6-digit zip code level [43]; Kaunas: neighborhood  
8 education level [44]; Stoke-on-Trent: English indices of deprivation 2010 [45]).  
9  
10  
11  
12  
13  
14  
15

### 16 17 Statistical analyses

18  
19 Equivalence tests were used to test for differences between dog owner and non-dog owner characteristics.  
20  
21 To investigate the association between dog ownership, leisure time walking, time spent in NOE, and  
22 general and mental health status, and whether these associations differed for respondents with varying  
23 exposure to NOE, we investigated:  
24  
25  
26

- 27 1. The associations between dog ownership, leisure time walking, time spent in NOE, general  
28 health status, and mental health.
- 29  
30 2. The associations specified at 1, including interaction terms between dog ownership and NOE  
31 indicators, to investigate whether these associations differed for respondents with varying  
32 exposure to NOE.
- 33  
34 3. The associations specified at 1, stratified by NOE exposure, when the interaction term (specified  
35 at 2) had a p-value  $<0.05$ , to investigate these associations for respondents with varying exposure  
36 to NOE.  
37  
38  
39  
40  
41

42 Associations were estimated using multilevel analysis with a random intercept defined at the city and  
43 neighborhood level. Models were adjusted for age, sex, education level, household composition,  
44 perceived income situation, neighborhood SES, NOE safety, disability restricting mobility, and chronic  
45 diseases and were selected because of an assumed relation with dog ownership, walking, NOE exposure  
46 and health. The main associations (as specified at 1) were also estimated for the cities separately.  
47  
48 Analyses were based on complete cases.  
49  
50  
51  
52

53  
54 Sensitivity analyses were undertaken to investigate whether adjustment for characteristics that were found  
55 to differ between dog owners and non-dog owners, and that may relate to health, changed the  
56  
57

1  
2  
3 associations. Models were additionally adjusted (separately and simultaneously) for smoking, BMI,  
4 frequency of contact with family and/or friends, and whether respondents feel part of a group of friends.  
5  
6 A second sensitivity analysis was undertaken to evaluate differences between time spent in NOE near  
7 home, and in or near the city for associations specified at 2 and 3 by using two variables: time spent in  
8 NOE in the city, and time spent in NOE near the city.  
9  
10

## 11 RESULTS

### 12 Population characteristics

13  
14  
15 Respondents were on average 51.4 (SD 15.9) years old and 54.9% was female. A total of 1109 (30.9%)  
16 respondents were dog owners. Dog owners compared with non-dog owners were on average the same  
17 age, had similar educational attainment but more were female (59.6% vs. 53.3%) and reported lower  
18 perceived income security. Dog ownership varied across cities, with it being highest in Kaunas (41.1%)  
19 and lowest in Doetinchem (16.5%). Dog owners walked more and spent more time in NOE compared  
20 with non-dog owners. However, dog owners had a lower perceived general and mental health status  
21 compared with non-dog owners. Dog owners also reported more frequently that physical constraints  
22 restricted their mobility, had more often a chronic disease, and had higher BMI than non-dog owners  
23 (Table 1).  
24  
25  
26  
27  
28  
29  
30  
31  
32  
33

34 (Table 1 here)

### 35 Dog ownership, leisure time walking, time spent in NOE and health

36  
37  
38 Adjusted multilevel models showed that dog ownership was associated with increased odds of walking  
39  $\geq 121$  minutes per week (i.e. higher than the median amount of walking) (odds ratio (OR) = 2.13, 95%  
40 confidence interval (CI) 1.82, 2.50) compared with non-dog owners. Dog ownership was also associated  
41 with increased odds of spending  $\geq 4$  hours/month in NOE (i.e. higher than the median amount of time in  
42 NOE) (OR= 2.42, 95% CI 2.05, 2.86) compared with non-dog owners. There were no differences in  
43 general health status and mental health between dog owners and non-dog owners. City-specific analyses  
44 showed similar results, with some exceptions: a positive association between dog ownership and general  
45 health in Barcelona (OR=1.90, 95% CI 1.01, 3.56); a positive association between dog ownership and  
46 mental health in Stoke-on-Trent (OR= 2.61, 95% CI 0.35, 4.86); but no association between dog  
47  
48  
49  
50  
51  
52  
53  
54  
55  
56  
57  
58  
59  
60

1  
2  
3 ownership and time spent in NOE in Doetinchem. In Kaunas, there were no associations between leisure  
4 time walking and time spent in NOE by dog ownership status (Table 2).

5  
6  
7 (Table 2 here)

8  
9 Interactions between dog ownership and NOE

10  
11  
12 We found indication for interaction between leisure time walking, dog ownership and number of NOE  
13 (all buffer sizes). Stratified analyses showed that dog owners with the highest number of NOE around  
14 their home had increased odds of performing  $\geq 121$  minutes per week of leisure time walking (i.e. higher  
15 than the median amount of walking) (e.g. 1000m buffer: OR= 3.54, 95% CI 2.76, 4.54) compared with  
16 non-dog owners. For those with a lower number of NOE, dog ownership was also associated with more  
17 leisure time walking, but odds ratios were smaller (e.g. 1000m buffer: OR= 1.41, 95% CI 1.14, 1.75).  
18 Similar results were observed for those with a shorter distance to the nearest NOE, and for those with a  
19 higher amount of surrounding greenness within 500m around home (Table 3).  
20  
21  
22  
23  
24  
25

26  
27 For time spent in NOE, there was indication of interaction between dog ownership and number of NOE  
28 within 500m and 1000m of home. Stratified analyses showed that dog owners with a higher number of  
29 NOE spent more time in NOE (i.e.  $\geq 4$  hours/month or higher than the median amount of time in NOE)  
30 compared with non-dog owners (e.g. 1000m buffer: OR= 4.31, 95% CI 3.31, 5.63). In comparison, dog  
31 owners with a lower number of NOE near home also spent more time in NOE compared with non-dog  
32 owners, but the odds ratios were smaller (e.g. 1000m buffer: OR= 1.60, 95% CI 1.29, 1.99) (Table 3).  
33  
34  
35  
36  
37  
38

39 There was indication for interaction between dog ownership and NOE exposure indicators in relation to  
40 mental health for the number and area of NOE within 1000m of home and for NDVI within 300m of  
41 home. Stratified analyses showed that dog owners with the highest number of NOE within 1000m of  
42 home had better mental health compared with non-dog owners ( $\beta = 2.70$ , 95% CI 1.08, 4.32), but showed  
43 no association for those with a below median number of NOE. Dog ownership was associated with better  
44 mental health for those with a lower amount of surrounding greenness within 300m around home ( $\beta =$   
45 1.79, 95% CI 0.06, 3.52), but not for those with a higher amount of surrounding greenness (Table 3).  
46  
47  
48  
49  
50

51 There were no associations between dog ownership and mental health, stratified by area of NOE within  
52 1000m of home. Finally, there was no indication for interaction between dog ownership and NOE  
53 exposure indicators in relation to general health status.  
54  
55  
56  
57

1  
2  
3 (Table 3 here)  
4  
5  
6  
7

8 Sensitivity analysis  
9

10 Additional adjusted for smoking, BMI, frequency of contact with family and/or friends, and whether  
11 respondents feel part of a group of friends, did not change the results (results available upon request).  
12  
13 Furthermore, there was no indication for interaction between dog ownership and time spent in NOE in  
14 and near the city (results available upon request).  
15  
16  
17  
18  
19  
20

## 21 DISCUSSION 22

23 Having a dog was associated with more leisure time walking and time spent in NOE near home compared  
24 with not having a dog. Moreover, the differences in walking and time spent in NOE between dog owners  
25 and non-dog owners were larger when there were more NOE near home. There was no consistent  
26 evidence for an association between dog ownership and general and mental health status. Only dog  
27 owners from Stoke-on-Trent had better mental health compared with non-dog owners, and dog owners  
28 from Barcelona had better general health compared to non-dog owners.  
29  
30  
31  
32  
33  
34

35 Prior studies have also observed links between NOE, dog ownership and physical activity. In support of  
36 our findings, a UK study of older adults reported that neighborhood greenness was associated with a  
37 smaller decline in physical activity over time, and that dog walking explained up to 50% of the variance  
38 in the relationship between greenness and outdoor physical activity [46]. Our findings were also  
39 consistent with a Danish study that found that dog ownership was a major determinant of park visits,  
40 especially those parks closest to the residence [25]. Our study adds to the evidence base by including  
41 multiple exposure indicators of NOE which enabled studying multiple exposure indicators of NOE  
42 simultaneously, and could help understand what metric best predicts the health benefits associated with  
43 NOE [26,27,29]. We found that dog owners spent more time in NOE than non-dog owners, but dog  
44 ownership was not consistently related to mental or general health status. Dog ownership was only related  
45 to better general or mental health in Barcelona and Stoke-on-Trent, the two cities where respondents were  
46 the least active and spent the least time in NOE, and may indicate that health benefits of dog ownership  
47  
48  
49  
50  
51  
52  
53  
54  
55  
56  
57  
58  
59  
60

1  
2  
3 exist when walking and time spent in NOE is low to begin with. Because we found no consistent evidence  
4 for health benefits for dog owners with better availability of NOE, future studies could also investigate  
5 subjective indicators of NOE, including satisfaction and importance, and neighborhood aesthetics [47].  
6  
7

8  
9 Although the cross-sectional nature of our study does not allow for understanding the longitudinal effects  
10 of dog ownership on health, it is possible that people with physical constraints and chronic diseases more  
11 often decide to have a dog, for example following doctor's advice, in order to stay mobile [22]. Similarly,  
12 another study reported that dog owners more often had asthma, and a higher BMI compared with non-dog  
13 owners [48]. Furthermore, an Australian study found that although pet ownership was associated with  
14 higher levels of physical activity, it was also associated with higher BMI, higher diastolic blood pressure,  
15 and smoking [49]. We found that despite being less healthy, dog owners engaged in about twice as much  
16 leisure time walking than non-dog owners. We hypothesize that the extra physical activity facilitated by  
17 dog walking may offset some of the other negative health risk factors dog owners have, and could  
18 eventually yield longer term health benefits. This may especially occur when there is access to NOE and  
19 the residential environment promotes walking.  
20  
21  
22  
23  
24  
25  
26  
27  
28

29 Limitations of this study include the lack of information about the dog owner's level of attachment to  
30 their dog, the duration of dog ownership, and if the respondent was the primary carer of the dog. We  
31 further did not know if the time spent in NOE and leisure time walking was undertaken together with the  
32 dog, and whether time spent in NOE was time spent walking. Future research should measure specific  
33 aspects of dog ownership and should use measures of behavior such as time spent in NOE with and  
34 without dog and leisure time walking undertaken with and without the dog. A limitation of self-reporting  
35 walking habits is potential overstatement of the amount of walking. Finally, we cannot establish the  
36 direction of the observed relationships because of the cross-sectional study design. For example, people  
37 who are already physically active and visit NOE may decide to get a dog, instead of dogs motivating their  
38 owners to walk and visit NOE more. Strengths include the multi-city approach, which revealed  
39 differences between cities concerning dog ownership and health. It is also one of the first studies from  
40 mainland Europe, since the majority of research has been carried out in North America, Australia, and in  
41 the UK. Finally, our measure of access to NOE was specific to environments that were suitable for  
42 physical activity. We also used road network buffers over circular buffers which better capture people's  
43 walking behavior; and we used varying buffer sizes to obtain a better understanding of what distance to  
44 NOE is most beneficial to health [41].  
45  
46  
47  
48  
49  
50  
51  
52  
53  
54  
55  
56  
57  
58



## Conclusions

Dog owners performed more leisure time walking and spent more time in NOE compared with non-dog owners, especially when the number of NOE around the home was greater. There was no consistent relationship between dog ownership and better general or mental health status. In a largely physically inactive society where many people remain indoors, dog walking in parks or other NOE may be an opportunity to engage people in walking behavior as a path towards better health.

## REFERENCES

- 1 Schweizer C, Edwards RD, Bayer-Oglesby L, *et al*. Indoor time–microenvironment–activity patterns in seven regions of Europe. *J Expo Sci Environ Epidemiol* 2007;**17**:170–81. doi:10.1038/sj.jes.7500490
- 2 Hallal PC, Andersen LB, Bull FC, *et al*. Global physical activity levels: Surveillance progress, pitfalls, and prospects. *Lancet* 2012;**380**:247–57. doi:10.1016/S0140-6736(12)60646-1
- 3 Ding D, Lawson KD, Kolbe-Alexander TL, *et al*. The economic burden of physical inactivity: a global analysis of major non-communicable diseases. *Lancet* 2016;**388**:1311–24. doi:10.1016/S0140-6736(16)30383-X
- 4 McCormack GR, Shiell A. In search of causality: a systematic review of the relationship between the built environment and physical activity among adults. *Int J Behav Nutr Phys Act* 2011;**8**:125. doi:10.1186/1479-5868-8-125
- 5 Sallis JF, Cerin E, Conway TL, *et al*. Physical activity in relation to urban environments in 14 cities worldwide: a cross-sectional study. *Lancet* 2016;**387**:2207–17. doi:10.1016/S0140-6736(15)01284-2
- 6 Schipperijn J, Cerin E, Adams MA, *et al*. Access to parks and physical activity: An eight country comparison. *Urban For Urban Green* 2017;**27**:253–63. doi:10.1016/j.ufug.2017.08.010
- 7 Lail P, McCormack GR, Rock M, *et al*. Does dog-ownership influence seasonal patterns of neighbourhood-based walking among adults? A longitudinal study. *BMC Public Health*

- 2011;**11**:148. doi:10.1186/1471-2458-11-148
- 8     Cutt H, Giles-Corti B, Knuiiman M, *et al*. Dog ownership, health and physical activity: A critical review of the literature. *Health Place* 2007;**13**:261–72. doi:10.1016/j.healthplace.2006.01.003
- 9     Westgarth C, Christley RM, Christian HE, *et al*. How might we increase physical activity through dog walking?: A comprehensive review of dog walking correlates. *Int J Behav Nutr Phys Act* 2014;**11**:83. doi:10.1186/1479-5868-11-83
- 10    Christian HE, Westgarth C, Bauman A, *et al*. Dog ownership and physical activity: a review of the evidence. *J Phys Act Health* 2013;**10**:750–9. <http://www.ncbi.nlm.nih.gov/pubmed/23006510>
- 11    Hoerster KD, Mayer JA, Sallis JF, *et al*. Dog walking: Its association with physical activity guideline adherence and its correlates. *Prev Med (Baltim)* 2011;**52**:33–8. doi:10.1016/j.ypmed.2010.10.011
- 12    Coleman KJ, Rosenberg DE, Conway TL, *et al*. Physical activity, weight status, and neighborhood characteristics of dog walkers. *Prev Med (Baltim)* 2008;**47**:309–12. doi:10.1016/j.ypmed.2008.05.007
- 13    Westgarth C, Boddy LM, Stratton G, *et al*. A cross-sectional study of frequency and factors associated with dog walking in 9–10 year old children in Liverpool, UK. *BMC Public Health* 2013;**13**:822. doi:10.1186/1471-2458-13-822
- 14    Christian H, Trapp G, Lauritsen C, *et al*. Understanding the relationship between dog ownership and children’s physical activity and sedentary behaviour. *Pediatr Obes* 2013;**8**:392–403. doi:10.1111/j.2047-6310.2012.00113.x
- 15    Sirard JR, Patnode CD, Hearst MO, *et al*. Dog Ownership and Adolescent Physical Activity. *Am J Prev Med* 2011;**40**:334–7. doi:10.1016/j.amepre.2010.11.007
- 16    Shibata A, Oka K, Inoue S, *et al*. Physical Activity of Japanese Older Adults Who Own and Walk Dogs. *Am J Prev Med* 2012;**43**:429–33. doi:10.1016/j.amepre.2012.06.019
- 17    Feng Z, Dibben C, Witham MD, *et al*. Dog ownership and physical activity in later life: A cross-sectional observational study. *Prev Med (Baltim)* 2014;**66**:101–6.

- 1  
2  
3 doi:10.1016/j.ypmed.2014.06.004  
4  
5  
6 18 Wu YT, Luben R, Jones A. Dog ownership supports the maintenance of physical activity during  
7 poor weather in older English adults: Cross-sectional results from the EPIC Norfolk cohort. *J*  
8 *Epidemiol Community Health* 2017;**71**:905–11. doi:10.1136/jech-2017-208987  
9  
10  
11 19 Arbillaga-Etxarri A, Gimeno-Santos E, Barberan-Garcia A, *et al.* Socio-environmental correlates  
12 of physical activity in patients with chronic obstructive pulmonary disease (COPD). *Thorax*  
13 2017;:thoraxjnl-2016-209209. doi:10.1136/thoraxjnl-2016-209209  
14  
15  
16  
17 20 McConnell AR, Brown CM, Shoda TM, *et al.* Friends with benefits: On the positive  
18 consequences of pet ownership. *J Pers Soc Psychol* 2011;**101**:1239–52. doi:10.1037/a0024506  
19  
20  
21  
22 21 Headey B, Grabka MM. Pets and Human Health in Germany and Australia: National  
23 Longitudinal Results. *Soc Indic Res* 2007;**80**:297–311. doi:10.1007/s11205-005-5072-z  
24  
25  
26 22 Mubanga M, Byberg L, Nowak C, *et al.* Dog ownership and the risk of cardiovascular disease  
27 and death – a nationwide cohort study. *Sci Rep* 2017;**7**:15821. doi:10.1038/s41598-017-16118-6  
28  
29  
30  
31 23 Christian (nee Cutt) H, Giles-Corti B, Knuiman M. ‘I’m Just a’-Walking the Dog’ Correlates of  
32 Regular Dog Walking. *Fam Community Health* 2010;**33**:44–52.  
33  
34 doi:10.1097/FCH.0b013e3181c4e208  
35  
36  
37 24 Cutt H, Giles-Corti B, Knuiman M. Encouraging physical activity through dog walking: Why  
38 don’t some owners walk with their dog? *Prev Med (Baltim)* 2008;**46**:120–6.  
39  
40 doi:10.1016/j.ypmed.2007.08.015  
41  
42  
43 25 Schipperijn J, Stigsdotter UK, Randrup TB, *et al.* Influences on the use of urban green space – A  
44 case study in Odense, Denmark. *Urban For Urban Green* 2010;**9**:25–32.  
45  
46 doi:10.1016/j.ufug.2009.09.002  
47  
48  
49 26 Frumkin H, Bratman GN, Breslow SJ, *et al.* Nature Contact and Human Health: A Research  
50 Agenda. *Environ Health Perspect* 2017;**125**:75001. doi:10.1289/EHP1663  
51  
52  
53 27 Nieuwenhuijsen MJ, Khreis H, Triguero-Mas M, *et al.* Fifty shades of green. *Epidemiology*.  
54 2017;**28**:63–71. doi:10.1097/EDE.0000000000000549  
55  
56  
57  
58  
59  
60

- 1  
2  
3 28 Markevych I, Schoierer J, Hartig T, *et al.* Exploring pathways linking greenspace to health:  
4 Theoretical and methodological guidance. *Environ Res* 2017;**158**:301–17.  
5  
6 doi:10.1016/j.envres.2017.06.028  
7  
8  
9 29 Nieuwenhuijsen MJ, Kruize H, Gidlow C, *et al.* Positive health effects of the natural outdoor  
10 environment in typical populations in different regions in Europe (PHENOTYPE): a study  
11 programme protocol. *BMJ Open* 2014;**4**:e004951. doi:10.1136/bmjopen-2014-004951  
12  
13  
14  
15 30 Wendel-Vos GCW, Schuit AJ, Saris WHM, *et al.* Reproducibility and relative validity of the  
16 short questionnaire to assess health-enhancing physical activity. *J Clin Epidemiol* 2003;**56**:1163–  
17 9.<http://www.ncbi.nlm.nih.gov/pubmed/14680666>  
18  
19  
20  
21 31 van Poppel MNM, Chinapaw MJM, Mokkink LB, *et al.* Physical Activity Questionnaires for  
22 Adults. *Sport Med* 2010;**40**:565–600. doi:10.2165/11531930-000000000-00000  
23  
24  
25 32 Ware JE, Sherbourne CD. The Mos 36-Item Short-Form Health Survey (Sf-36) .1. Conceptual-  
26 Framework and Item Selection. *Med Care* 1992;**30**:473–83. doi:10.1097/00005650-199206000-  
27 00002  
28  
29  
30  
31 33 Mavaddat N, Kinmonth AL, Sanderson S, *et al.* What determines Self-Rated Health (SRH)? A  
32 cross-sectional study of SF-36 health domains in the EPIC-Norfolk cohort. *J Epidemiol*  
33 *Community Heal* 2011;**65**:800–6. doi:10.1136/jech.2009.090845  
34  
35  
36  
37  
38 34 Kyffin RGE, Goldacre MJ, Gill M. Mortality rates and self reported health: database analysis by  
39 English local authority area. *BMJ* 2004;**329**:887–8. doi:10.1136/bmj.38238.508021.F7  
40  
41  
42 35 Ware JE. SF-36 health survey update. *Spine (Phila Pa 1976)* 2000;**25**:3130–  
43 9.<http://www.ncbi.nlm.nih.gov/pubmed/11124729>  
44  
45  
46  
47 36 Smith G, Círach M, Swart W, *et al.* Characterisation of the natural environment: quantitative  
48 indicators across Europe. *Int J Health Geogr* 2017;**16**:16. doi:10.1186/s12942-017-0090-z  
49  
50  
51 37 Weier J, Herring D. Measuring Vegetation (NDVI & EVI).  
52 2000.[http://earthobservatory.nasa.gov/Features/MeasuringVegetation/measuring\\_vegetation\\_2.ph](http://earthobservatory.nasa.gov/Features/MeasuringVegetation/measuring_vegetation_2.ph)  
53  
54  
55 p  
56  
57  
58  
59  
60

- 1  
2  
3 38 Dadvand P, Bartoll X, Basagaña X, *et al.* Green spaces and General Health: Roles of mental  
4 health status, social support, and physical activity. *Environ Int* 2016;**91**:161–7.  
5  
6 doi:10.1016/j.envint.2016.02.029  
7
- 8  
9 39 McEachan RRC, Prady SL, Smith G, *et al.* The association between green space and depressive  
10 symptoms in pregnant women: moderating roles of socioeconomic status and physical activity. *J*  
11 *Epidemiol Community Health* 2016;**70**:253–9. doi:10.1136/jech-2015-205954  
12  
13  
14
- 15 40 Oliver LN, Schuurman N, Hall AW. Comparing circular and network buffers to examine the  
16 influence of land use on walking for leisure and errands. *Int J Health Geogr* 2007;**6**:41.  
17  
18 doi:10.1186/1476-072X-6-41  
19  
20
- 21 41 Browning M, Lee K. Within What Distance Does ‘Greenness’ Best Predict Physical Health? A  
22 Systematic Review of Articles with GIS Buffer Analyses across the Lifespan. *Int J Environ Res*  
23 *Public Health* 2017;**14**:675. doi:10.3390/ijerph14070675  
24  
25  
26
- 27 42 Domínguez-Berjón MF, Borrell C, Cano-Serral G, *et al.* [Constructing a deprivation index based  
28 on census data in large Spanish cities(the MEDEA project)]. *Gac Sanit* 2008;**22**:179–  
29  
30 87.<http://www.ncbi.nlm.nih.gov/pubmed/18579042>  
31  
32
- 33 43 Statistics Netherlands. CBS - Kerncijfers wijken en buurten 2004-2013. Cent. Bur. voor Stat. Den  
34 Haag/Heerlen. 2013.[http://www.cbs.nl/nl-NL/menu/themas/dossiers/nederland-](http://www.cbs.nl/nl-NL/menu/themas/dossiers/nederland-regionaal/cijfers/incidenteel/maatwerk/wijk-buurtstatistieken/kwb-recent/default.htm)  
35  
36 [regionaal/cijfers/incidenteel/maatwerk/wijk-buurtstatistieken/kwb-recent/default.htm](http://www.cbs.nl/nl-NL/menu/themas/dossiers/nederland-regionaal/cijfers/incidenteel/maatwerk/wijk-buurtstatistieken/kwb-recent/default.htm)  
37  
38
- 39 44 Statistics Lithuania. Population and Housing Census of the Republic of Lithuania, 2011. Vilnius:  
40 2013. [https://osp.stat.gov.lt/documents/.../Report2011\\_Population\\_and\\_Housing\\_Census](https://osp.stat.gov.lt/documents/.../Report2011_Population_and_Housing_Census)  
41  
42  
43
- 44 45 Department for Communities and Local Government. English Indices of Deprivation 2010.  
45 2010.[https://www.gov.uk/government/uploads/system/uploads/attachment\\_data/file/6872/187152](https://www.gov.uk/government/uploads/system/uploads/attachment_data/file/6872/1871524.xls)  
46  
47 4.xls  
48  
49
- 50 46 Dalton AM, Wareham N, Griffin S, *et al.* Neighbourhood greenspace is associated with a slower  
51 decline in physical activity in older adults: A prospective cohort study. *SSM - Popul Heal*  
52 2016;**2**:683–91. doi:10.1016/j.ssmph.2016.09.006  
53  
54  
55
- 56 47 Root ED, Silbernagel K, Litt JS. Unpacking healthy landscapes: Empirical assessment of  
57  
58  
59

neighborhood aesthetic ratings in an urban setting. *Landsc Urban Plan* 2017;**168**:38–47.

doi:10.1016/J.LANDURBPLAN.2017.09.028

48 Saunders J, Parast L, Babey SH, *et al.* Exploring the differences between pet and non-pet owners:

Implications for human-animal interaction research and policy. *PLoS One* 2017;**12**:e0179494.

doi:10.1371/journal.pone.0179494

49 Parslow RA, Jorm AF. Pet ownership and risk factors for cardiovascular disease: another look.

*Med J Aust* 2003;**179**:466–8

For peer review only

1  
2  
3  
4  
5  
6  
7  
8  
9  
10  
11  
12  
13  
14  
15  
16  
17  
18  
19  
20  
21  
22  
23  
24  
25  
26  
27  
28  
29  
30  
31  
32  
33  
34  
35  
36  
37  
38  
39  
40  
41  
42  
43  
44  
45  
46  
47  
48  
49  
50  
51  
52  
53  
54  
55  
56  
57  
58  
59  
60

Tables.

Table 1. Population characteristics by dog-ownership

|                                                | Total<br>n=3586 | Non-dog-<br>owner n=2478 | Dog owner<br>n=1108 | p-value* |
|------------------------------------------------|-----------------|--------------------------|---------------------|----------|
| Age, mean (SD)                                 | 51.4 (15.9)     | 51.3 (15.9)              | 51.7 (16.0)         | .440     |
| Sex, n (females %)                             | 1967 (54.9)     | 1314 (53.0)              | 653 (58.9)          | <.001    |
| Household composition, n (%)                   |                 |                          |                     | <.001    |
| <i>alone</i>                                   | 614 (17.1)      | 461 (18.6)               | 153 (13.8)          |          |
| <i>with partner (without children)</i>         | 1239 (34.5)     | 864 (34.9)               | 375 (33.8)          |          |
| <i>with children &lt;12 yr old</i>             | 535 (14.9)      | 383 (15.5)               | 152 (13.7)          |          |
| <i>with children &gt;12 yr old</i>             | 602 (16.8)      | 368 (14.9)               | 234 (21.2)          |          |
| <i>other</i>                                   | 597 (16.6)      | 402 (16.2)               | 195 (17.6)          |          |
| City, n (%)                                    |                 |                          |                     | <.001    |
| <i>Barcelona</i>                               | 979 (27.3)      | 790 (31.9)               | 189 (17.1)          |          |
| <i>Doetinchem</i>                              | 851 (23.7)      | 668 (27.0)               | 183 (16.5)          |          |
| <i>Kaunas</i>                                  | 892 (24.9)      | 436 (17.6)               | 456 (41.1)          |          |
| <i>Stoke-on-Trent</i>                          | 864 (24.1)      | 584 (23.6)               | 280 (25.3)          |          |
| Education, n (%)                               |                 |                          |                     | .511     |
| <i>low</i>                                     | 251 (7.0)       | 163 (6.6)                | 88 (7.9)            |          |
| <i>medium</i>                                  | 1568 (43.7)     | 1087 (43.9)              | 481 (43.5)          |          |
| <i>high</i>                                    | 1767 (49.3)     | 1228 (49.6)              | 539 (48.6)          |          |
| Perceived income situation, n (%)              |                 |                          |                     | <.001    |
| <i>cannot make ends meet</i>                   | 385 (10.7)      | 276 (11.1)               | 109 (9.8)           |          |
| <i>enough to get by</i>                        | 1800 (50.2)     | 1165 (47.0)              | 635 (57.3)          |          |
| <i>comfortable</i>                             | 1401 (39.1)     | 1037 (41.9)              | 364 (32.9)          |          |
| Home ownership, n (% yes)                      | 2040 (57.4)     | 1319 (53.8)              | 721 (65.4)          | <.001    |
| Crowding index (rooms/person),<br>median (IQR) | 1.5 (2)         | 1.7 (1.5)                | 1.5 (1)             | <.001    |
| Housing type, n (%)                            |                 |                          |                     | <.001    |

|                                                        |             |             |             |       |
|--------------------------------------------------------|-------------|-------------|-------------|-------|
| <i>detached</i>                                        | 888 (24.8)  | 630 (25.4)  | 258 (23.3)  |       |
| <i>semi-detached</i>                                   | 1064 (29.7) | 656 (26.5)  | 408 (36.8)  |       |
| <i>flat</i>                                            | 1548 (43.2) | 1137 (45.9) | 411 (37.1)  |       |
| <i>other</i>                                           | 82 (2.3)    | 53 (2.1)    | 29 (2.6)    |       |
| Yard access, n (% yes)                                 | 1875 (53.4) | 1239 (50.8) | 636 (59.4)  | <.001 |
| General health, n (%)                                  |             |             |             | <.001 |
| <i>Excellent, (very) good</i>                          | 2662 (74.2) | 1939 (78.3) | 723 (65.2)  |       |
| <i>(Very) Bad</i>                                      | 924 (25.8)  | 539 (21.8)  | 385 (34.8)  |       |
| Mental health (SF-36), mean (SD)                       | 73.5 (16.3) | 73.9 (16.2) | 72.5 (16.3) | .007  |
| Weight status (BMI categories), n (%)                  |             |             |             | <.001 |
| <i>healthy weight</i>                                  | 1610 (44.9) | 1165 (47.0) | 445 (40.2)  |       |
| <i>overweight</i>                                      | 1192 (33.2) | 819 (33.1)  | 373 (33.6)  |       |
| <i>obese</i>                                           | 784 (21.9)  | 494 (19.9)  | 290 (26.2)  |       |
| Physical constraint restricting mobility, n (%)        | 1003 (25.4) | 536 (19.9)  | 467 (37.3)  | <.001 |
| One or more chronic diseases, n (%)                    | 1313 (36.6) | 860 (34.7)  | 453 (40.9)  | <.001 |
| Minutes/week walking (leisure), median (IQR)           | 120 (300)   | 90 (240)    | 180 (420)   | <.001 |
| Smoking, n (%)                                         |             |             |             | .016  |
| <i>current</i>                                         | 733 (20.5)  | 478 (19.3)  | 255 (23.0)  |       |
| <i>former</i>                                          | 1008 (28.1) | 724 (29.2)  | 284 (25.6)  |       |
| <i>never</i>                                           | 1843 (51.4) | 1275 (51.5) | 568 (51.3)  |       |
| Frequency of contact with family and/or friends, n (%) |             |             |             | .256  |
| <i>(almost) daily</i>                                  | 2135 (59.5) | 1470 (59.3) | 665 (60.0)  |       |
| <i>≥1 per week</i>                                     | 1114 (31.1) | 781 (31.1)  | 333 (30.0)  |       |
| <i>1-3 per month or less</i>                           | 392 (9.4)   | 227 (9.2)   | 111 (10.0)  |       |
| Feeling part of a group of friends, n %                |             |             |             | <.001 |
| <i>(totally) agree</i>                                 | 2414 (67.5) | 1754 (70.9) | 660 (59.7)  |       |
| <i>neutral, (totally) disagree</i>                     | 1165 (32.5) | 719 (29.1)  | 446 (40.3)  |       |



|                                                          |                   |                   |                   |       |
|----------------------------------------------------------|-------------------|-------------------|-------------------|-------|
| Perceived safety of NOE in NBH, n (%)                    |                   |                   |                   | .012  |
| <i>(very) satisfied</i>                                  | 2123 (59.2)       | 1486 (60.0)       | 637 (57.5)        |       |
| <i>neutral</i>                                           | 776 (21.6)        | 542 (21.9)        | 234 (21.1)        |       |
| <i>(very) dissatisfied</i>                               | 687 (19.2)        | 450 (18.2)        | 237 (21.4)        |       |
| NBH SES, n (%)                                           |                   |                   |                   | .425  |
| <i>low</i>                                               | 1131 (31.5)       | 791 (31.9)        | 340 (30.7)        |       |
| <i>medium</i>                                            | 1379 (38.4)       | 938 (37.9)        | 441 (39.8)        |       |
| <i>high</i>                                              | 1076 (30.0)       | 749 (30.2)        | 327 (29.5)        |       |
| Hours spent in NOE near home in last 4 wks, median (IQR) | 4 (11.8)          | 3.75 (10)         | 10 (29.3)         | <.001 |
| Average NDVI in 100m buffer, median (IQR)                | 0.46 (0.16)       | 0.44 (0.28)       | 0.50 (0.16)       | <.001 |
| Average NDVI in 300m buffer, median (IQR)                | 0.49 (0.23)       | 0.47 (0.30)       | 0.51 (0.13)       | <.001 |
| Average NDVI in 500m buffer, median (IQR)                | 0.49 (0.23)       | 0.48 (0.31)       | 0.51 (0.11)       | <.001 |
| Distance to nearest NOE (m), median (IQR)                | 161.0 (214)       | 155.7 (205.6)     | 172.4 (232.4)     | <.001 |
| Number of NOE in 300m NWB, median (IQR)                  | 1 (1)             | 1 (2)             | 1 (2)             | <.001 |
| Number of NOE in 500m NWB, median (IQR)                  | 1 (1)             | 3 (3)             | 3 (3)             | <.001 |
| Number of NOE in 1000m NWB, median (IQR)                 | 10 (10)           | 11 (10)           | 8 (10)            | <.001 |
| Area of NOE in 300m NWB (m <sup>2</sup> ), median (IQR)  | 38,013 (136,092)  | 36,007 (132,239)  | 41,241 (154,377)  | .581  |
| Area of NOE in 500m NWB (m <sup>2</sup> ), median (IQR)  | 140,281 (286,917) | 137,862 (261,453) | 150,758 (402,966) | .024  |
| Area of NOE in 1000m NWB (m <sup>2</sup> ), median (IQR) | 588,516 (975,551) | 557,191 (890,303) | 720,366 (239,293) | <.001 |

NOE= natural outdoor environments; NBH= neighborhood; NWB= network buffer; IQR= interquartile range; SD= standard deviation; BMI= body mass index; SES= socioeconomic status. \* based on t-tests, Chi-square, Kruskal-Wallis, and rank-sum tests.

Table 2. Associations between dog-ownership, leisure time walking, time spent in NOE near the home, general health status and mental health.

|                         | Leisure time walking above median (reference: below median) | Time spent in NOE near home above median (reference: below median) | General health, excellent, (very) good (reference: fair, poor) OR (95% CI) | Mental health (scale 0-100, higher is better) $\beta$ (95% CI) |
|-------------------------|-------------------------------------------------------------|--------------------------------------------------------------------|----------------------------------------------------------------------------|----------------------------------------------------------------|
| Dog ownership (vs. not) | OR (95% CI)                                                 | OR (95% CI)                                                        | OR (95% CI)                                                                | $\beta$ (95% CI)                                               |
| Total                   | 2.13 (1.82; 2.50)<br>n=3586                                 | 2.42 (2.05; 2.86)<br>n=3530                                        | 1.03 (0.82; 1.29)<br>n=3586                                                | 0.42 (-0.71; 1.55)<br>n=3584                                   |
| Barcelona               | 1.46 (1.03; 2.08)<br>n=979                                  | 2.14 (1.47; 3.13)<br>n=978                                         | 1.90 (1.01; 3.56)<br>n=979                                                 | 0.13 (-2.29; 2.55)<br>n=979                                    |
| Doetinchem              | 7.97 (5.18; 12.25)<br>n=851                                 | 1.18 (0.80; 1.73)<br>n=846                                         | 0.89 (0.37; 2.17)<br>n=851                                                 | 1.61 (-0.55; 3.78)<br>n=849                                    |
| Kaunas                  | 1.05 (0.79; 1.39)<br>n=892                                  | 1.26 (0.93; 1.69)<br>n=844                                         | 0.71 (0.50; 1.00)<br>n=892                                                 | -2.17 (-4.40; 0.06)<br>n=892                                   |
| Stoke-on-Trent          | 2.01 (1.44; 2.79)<br>n=864                                  | 2.31 (1.63; 3.27)<br>n=862                                         | 0.89 (0.57; 1.37)<br>n=864                                                 | 2.61 (0.35; 4.86)<br>n=864                                     |

NOE= natural outdoor environments; OR= odds ratio; CI= confidence interval

1  
2  
3 *Analytical method: mixed models with random intercept for cities\* and neighborhoods and adjusted for*  
4 *age, sex, education, neighborhood SES, household composition, perceived income situation, perceived*  
5 *NOE safety, physical constraint restricting mobility, and chronic diseases.*

6  
7  
8 *\*for analyses with total sample. Analyses were based on complete cases.*  
9

10  
11  
12  
13  
14  
15  
16  
17  
18  
19  
20  
21  
22  
23  
24  
25  
26  
27  
28  
29  
30  
31  
32  
33  
34  
35  
36  
37  
38  
39  
40  
41  
42  
43  
44  
45  
46  
47  
48  
49  
50  
51  
52  
53  
54  
55  
56  
57  
58  
59  
60

For peer review only

Table 3. Interactions between dog-ownership and the NOE and the relation with leisure time walking, time spent in NOE near the home, general health and mental health.

|                         | Leisure time walking above median (reference: below median) | Time spent in NOE near home above median (reference: below median) | General health, excellent, (very) good (reference: fair, poor) | Mental health (scale 0-100, higher is better) |
|-------------------------|-------------------------------------------------------------|--------------------------------------------------------------------|----------------------------------------------------------------|-----------------------------------------------|
| Dog ownership (vs. not) | OR (95% CI)                                                 | OR (95% CI)                                                        | OR (95% CI)                                                    | $\beta$ (95% CI)                              |
| 300m                    | $p_{\text{interaction}} .007$                               | $p_{\text{interaction}} .101$                                      | $p_{\text{interaction}} .700$                                  | $p_{\text{interaction}} .335$                 |
| lowest                  | 1.75 (1.43; 2.14)<br>n=2082                                 | NA                                                                 | NA                                                             | NA                                            |
| highest                 | 2.99 (2.30; 3.88)<br>n=1504                                 | NA                                                                 | NA                                                             | NA                                            |
| 500m                    | $p_{\text{interaction}} .006$                               | $p_{\text{interaction}} .015$                                      | $p_{\text{interaction}} .504$                                  | $p_{\text{interaction}} .349$                 |
| lowest                  | 1.70 (1.38; 2.09)<br>n=1944                                 | 2.01 (1.62; 2.49)<br>n=1902                                        | NA                                                             | NA                                            |
| highest                 | 2.97 (2.31; 3.83)<br>n=1642                                 | 3.36 (2.58; 4.38)<br>n=1628                                        | NA                                                             | NA                                            |
| 1000m                   | $p_{\text{interaction}} <.001$                              | $p_{\text{interaction}} <.001$                                     | $p_{\text{interaction}} .714$                                  | $p_{\text{interaction}} <.001$                |
| lowest                  | 1.41 (1.14; 1.75)<br>n=1820                                 | 1.60 (1.29; 1.99)<br>n=1773                                        | NA                                                             | -1.45 (-3.02, 0.13)<br>n=1819                 |
| highest                 | 3.54 (2.76; ...)                                            | 4.31 (3.31; ...)                                                   | NA                                                             | 2.70 (1.08, ...)                              |

|                                    |         |                               |                               |                               |
|------------------------------------|---------|-------------------------------|-------------------------------|-------------------------------|
|                                    |         | 4.54)                         | 5.63)                         | 4.32)                         |
|                                    |         | n=1766                        | n=1757                        | n=1765                        |
|                                    | 300m    | p <sub>interaction</sub> .407 | p <sub>interaction</sub> .224 | p <sub>interaction</sub> .286 |
|                                    | lowest  | NA                            | NA                            | NA                            |
|                                    | highest | NA                            | NA                            | NA                            |
|                                    | 500m    | p <sub>interaction</sub> .071 | p <sub>interaction</sub> .715 | p <sub>interaction</sub> .897 |
|                                    | lowest  | NA                            | NA                            | NA                            |
|                                    | highest | NA                            | NA                            | NA                            |
| Area of NOE                        | 1000m   | p <sub>interaction</sub> .114 | p <sub>interaction</sub> .155 | p <sub>interaction</sub> .607 |
|                                    | lowest  | NA                            | NA                            | NA                            |
|                                    |         |                               |                               | -0.75 (-2.42,                 |
|                                    |         |                               |                               | 0.92)                         |
|                                    |         |                               |                               | n=1787                        |
|                                    | highest | NA                            | NA                            | NA                            |
|                                    |         |                               |                               | 1.33 (-0.20,                  |
|                                    |         |                               |                               | 2.85)                         |
|                                    |         |                               |                               | n=1797                        |
|                                    | 100m    | p <sub>interaction</sub> .820 | p <sub>interaction</sub> .566 | p <sub>interaction</sub> .989 |
|                                    | lowest  | NA                            | NA                            | NA                            |
|                                    | highest | NA                            | NA                            | NA                            |
|                                    | 300m    | p <sub>interaction</sub> .284 | p <sub>interaction</sub> .895 | p <sub>interaction</sub> .770 |
|                                    | lowest  | NA                            | NA                            | NA                            |
|                                    |         |                               |                               | 1.79 (0.06,                   |
|                                    |         |                               |                               | 3.52)                         |
|                                    |         |                               |                               | n=1786                        |
| Surrounding<br>greenness<br>(NDVI) | highest | NA                            | NA                            | NA                            |
|                                    |         |                               |                               | -0.93 (-2.41,                 |
|                                    |         |                               |                               | 0.56)                         |
|                                    |         |                               |                               | n=1798                        |
|                                    | 500m    | p <sub>interaction</sub> .014 | p <sub>interaction</sub> .248 | p <sub>interaction</sub> .735 |
|                                    | lowest  | 1.72 (1.34;                   | NA                            | NA                            |
|                                    |         | 2.22)                         |                               | NA                            |
|                                    |         | n=1765                        |                               |                               |
|                                    | highest | 2.50 (2.03;                   | NA                            | NA                            |
|                                    |         |                               |                               | NA                            |

|  |               |                               |                               |                                |                               |
|--|---------------|-------------------------------|-------------------------------|--------------------------------|-------------------------------|
|  |               | 3.09)                         |                               |                                |                               |
|  |               | n=1821                        |                               |                                |                               |
|  |               | $p_{\text{interaction}} .043$ | $p_{\text{interaction}} .070$ | $p_{\text{interaction}} 0.520$ | $p_{\text{interaction}} .725$ |
|  | closest       | 2.57 (2.04;                   | NA                            | NA                             | NA                            |
|  |               | 3.23)                         |                               |                                |                               |
|  | Distance to   | n=1801                        |                               |                                |                               |
|  | nearest NOE   |                               |                               |                                |                               |
|  | furthest      | 1.84 (1.48;                   | NA                            | NA                             | NA                            |
|  |               | 2.29)                         |                               |                                |                               |
|  |               | n=1785                        |                               |                                |                               |
|  |               | $p_{\text{interaction}} .401$ | NA                            | $p_{\text{interaction}} .493$  | $p_{\text{interaction}} .150$ |
|  | Time spent in |                               |                               |                                |                               |
|  | NOE near home |                               |                               |                                |                               |
|  | lowest        | NA                            | NA                            | NA                             | NA                            |
|  | highest       | NA                            | NA                            | NA                             | NA                            |

NOE= natural outdoor environments; OR= odds ratio; CI= confidence interval; NA= not applicable;

NDVI= normalized difference vegetation index. *Analytical method: mixed models with random intercept for cities and neighborhoods and adjusted for age, sex, education, neighborhood SES, household composition, perceived income situation, perceived NOE safety, physical constraint restricting mobility, and chronic diseases. Analyses were based on complete cases.*

## STROBE Statement—checklist of items that should be included in reports of observational studies

|                          | Item No | Recommendation                                                                                                                                                                                                                                                                                                                                                                                                                                                         | Appears in manuscript on page |
|--------------------------|---------|------------------------------------------------------------------------------------------------------------------------------------------------------------------------------------------------------------------------------------------------------------------------------------------------------------------------------------------------------------------------------------------------------------------------------------------------------------------------|-------------------------------|
| Title and abstract       | 1       | (a) Indicate the study's design with a commonly used term in the title or the abstract                                                                                                                                                                                                                                                                                                                                                                                 | 1, 3                          |
|                          |         | (b) Provide in the abstract an informative and balanced summary of what was done and what was found                                                                                                                                                                                                                                                                                                                                                                    | 3,4                           |
| <b>Introduction</b>      |         |                                                                                                                                                                                                                                                                                                                                                                                                                                                                        |                               |
| Background/rationale     | 2       | Explain the scientific background and rationale for the investigation being reported                                                                                                                                                                                                                                                                                                                                                                                   | 6                             |
| Objectives               | 3       | State specific objectives, including any prespecified hypotheses                                                                                                                                                                                                                                                                                                                                                                                                       | 6                             |
| <b>Methods</b>           |         |                                                                                                                                                                                                                                                                                                                                                                                                                                                                        |                               |
| Study design             | 4       | Present key elements of study design early in the paper                                                                                                                                                                                                                                                                                                                                                                                                                | 7                             |
| Setting                  | 5       | Describe the setting, locations, and relevant dates, including periods of recruitment, exposure, follow-up, and data collection                                                                                                                                                                                                                                                                                                                                        | 7-10                          |
| Participants             | 6       | (a) <i>Cohort study</i> —Give the eligibility criteria, and the sources and methods of selection of participants. Describe methods of follow-up<br><i>Case-control study</i> —Give the eligibility criteria, and the sources and methods of case ascertainment and control selection. Give the rationale for the choice of cases and controls<br><i>Cross-sectional study</i> —Give the eligibility criteria, and the sources and methods of selection of participants | 7                             |
|                          |         | (b) <i>Cohort study</i> —For matched studies, give matching criteria and number of exposed and unexposed<br><i>Case-control study</i> —For matched studies, give matching criteria and the number of controls per case                                                                                                                                                                                                                                                 | n.a.                          |
| Variables                | 7       | Clearly define all outcomes, exposures, predictors, potential confounders, and effect modifiers. Give diagnostic criteria, if applicable                                                                                                                                                                                                                                                                                                                               | 7-10                          |
| Data sources/measurement | 8*      | For each variable of interest, give sources of data and details of methods of assessment (measurement). Describe comparability of assessment methods if there is more than one group                                                                                                                                                                                                                                                                                   | 7-10                          |
| Bias                     | 9       | Describe any efforts to address potential sources of bias                                                                                                                                                                                                                                                                                                                                                                                                              | 7-11                          |
| Study size               | 10      | Explain how the study size was arrived at                                                                                                                                                                                                                                                                                                                                                                                                                              | 7                             |
| Quantitative variables   | 11      | Explain how quantitative variables were handled in the analyses. If applicable, describe which groupings were chosen and why                                                                                                                                                                                                                                                                                                                                           | 7-10                          |
| Statistical methods      | 12      | (a) Describe all statistical methods, including those used to control for confounding                                                                                                                                                                                                                                                                                                                                                                                  | 10-11                         |
|                          |         | (b) Describe any methods used to examine subgroups and interactions                                                                                                                                                                                                                                                                                                                                                                                                    | 10-11                         |
|                          |         | (c) Explain how missing data were addressed                                                                                                                                                                                                                                                                                                                                                                                                                            | 10                            |
|                          |         | (d) <i>Cohort study</i> —If applicable, explain how loss to follow-up was addressed<br><i>Case-control study</i> —If applicable, explain how matching of                                                                                                                                                                                                                                                                                                               | 10-11                         |

|                          |     |                                                                                                                                                                                                              |                                      |
|--------------------------|-----|--------------------------------------------------------------------------------------------------------------------------------------------------------------------------------------------------------------|--------------------------------------|
|                          |     | cases and controls was addressed                                                                                                                                                                             |                                      |
|                          |     | <i>Cross-sectional study</i> —If applicable, describe analytical methods taking account of sampling strategy                                                                                                 |                                      |
|                          |     | (e) Describe any sensitivity analyses                                                                                                                                                                        | 10-11                                |
| <b>Results</b>           |     |                                                                                                                                                                                                              | <b>Appears in manuscript on page</b> |
| Participants             | 13* | (a) Report numbers of individuals at each stage of study—eg numbers potentially eligible, examined for eligibility, confirmed eligible, included in the study, completing follow-up, and analysed            | -                                    |
|                          |     | (b) Give reasons for non-participation at each stage                                                                                                                                                         | -                                    |
|                          |     | (c) Consider use of a flow diagram                                                                                                                                                                           | -                                    |
| Descriptive data         | 14* | (a) Give characteristics of study participants (eg demographic, clinical, social) and information on exposures and potential confounders                                                                     | 11                                   |
|                          |     | (b) Indicate number of participants with missing data for each variable of interest                                                                                                                          | -                                    |
|                          |     | (c) <i>Cohort study</i> —Summarise follow-up time (eg, average and total amount)                                                                                                                             | n.a.                                 |
| Outcome data             | 15* | <i>Cohort study</i> —Report numbers of outcome events or summary measures over time                                                                                                                          | n.a.                                 |
|                          |     | <i>Case-control study</i> —Report numbers in each exposure category, or summary measures of exposure                                                                                                         | n.a.                                 |
|                          |     | <i>Cross-sectional study</i> —Report numbers of outcome events or summary measures                                                                                                                           | Table 1                              |
| Main results             | 16  | (a) Give unadjusted estimates and, if applicable, confounder-adjusted estimates and their precision (eg, 95% confidence interval). Make clear which confounders were adjusted for and why they were included | Tables, 11-12                        |
|                          |     | (b) Report category boundaries when continuous variables were categorized                                                                                                                                    | Tables, 7-10                         |
|                          |     | (c) If relevant, consider translating estimates of relative risk into absolute risk for a meaningful time period                                                                                             | n.a.                                 |
| Other analyses           | 17  | Report other analyses done—eg analyses of subgroups and interactions, and sensitivity analyses                                                                                                               | Tables, 12-13                        |
| <b>Discussion</b>        |     |                                                                                                                                                                                                              |                                      |
| Key results              | 18  | Summarise key results with reference to study objectives                                                                                                                                                     | 13                                   |
| Limitations              | 19  | Discuss limitations of the study, taking into account sources of potential bias or imprecision. Discuss both direction and magnitude of any potential bias                                                   | 14                                   |
| Interpretation           | 20  | Give a cautious overall interpretation of results considering objectives, limitations, multiplicity of analyses, results from similar studies, and other relevant evidence                                   | 13-14                                |
| Generalisability         | 21  | Discuss the generalisability (external validity) of the study results                                                                                                                                        | 13-14                                |
| <b>Other information</b> |     |                                                                                                                                                                                                              |                                      |
| Funding                  | 22  | Give the source of funding and the role of the funders for the present study and, if applicable, for the original study on which the present article is based                                                | 4-5                                  |



1  
2  
3  
4  
5  
6  
7  
8  
9  
10  
11  
12  
13  
14  
15  
16  
17  
18  
19  
20  
21  
22  
23  
24  
25  
26  
27  
28  
29  
30  
31  
32  
33  
34  
35  
36  
37  
38  
39  
40  
41  
42  
43  
44  
45  
46  
47  
48  
49  
50  
51  
52  
53  
54  
55  
56  
57  
58  
59  
60

\*Give information separately for cases and controls in case-control studies and, if applicable, for exposed and unexposed groups in cohort and cross-sectional studies.

**Note:** An Explanation and Elaboration article discusses each checklist item and gives methodological background and published examples of transparent reporting. The STROBE checklist is best used in conjunction with this article (freely available on the Web sites of PLoS Medicine at <http://www.plosmedicine.org/>, Annals of Internal Medicine at <http://www.annals.org/>, and Epidemiology at <http://www.epidem.com/>). Information on the STROBE Initiative is available at [www.strobe-statement.org](http://www.strobe-statement.org).

For peer review only

# BMJ Open

## Dog ownership, the natural outdoor environment and health: a cross-sectional study

|                                 |                                                                                                                                                                                                                                                                                                                                                                                                                                                                                                                                                                                                                                                                                                                                                                                                                                                                                                                                                                                                                                                                                                                                                                                                                                                                                                         |
|---------------------------------|---------------------------------------------------------------------------------------------------------------------------------------------------------------------------------------------------------------------------------------------------------------------------------------------------------------------------------------------------------------------------------------------------------------------------------------------------------------------------------------------------------------------------------------------------------------------------------------------------------------------------------------------------------------------------------------------------------------------------------------------------------------------------------------------------------------------------------------------------------------------------------------------------------------------------------------------------------------------------------------------------------------------------------------------------------------------------------------------------------------------------------------------------------------------------------------------------------------------------------------------------------------------------------------------------------|
| Journal:                        | <i>BMJ Open</i>                                                                                                                                                                                                                                                                                                                                                                                                                                                                                                                                                                                                                                                                                                                                                                                                                                                                                                                                                                                                                                                                                                                                                                                                                                                                                         |
| Manuscript ID                   | bmjopen-2018-023000.R1                                                                                                                                                                                                                                                                                                                                                                                                                                                                                                                                                                                                                                                                                                                                                                                                                                                                                                                                                                                                                                                                                                                                                                                                                                                                                  |
| Article Type:                   | Research                                                                                                                                                                                                                                                                                                                                                                                                                                                                                                                                                                                                                                                                                                                                                                                                                                                                                                                                                                                                                                                                                                                                                                                                                                                                                                |
| Date Submitted by the Author:   | 01-Nov-2018                                                                                                                                                                                                                                                                                                                                                                                                                                                                                                                                                                                                                                                                                                                                                                                                                                                                                                                                                                                                                                                                                                                                                                                                                                                                                             |
| Complete List of Authors:       | Zijlema, Wilma; Instituto de Salud Global Barcelona, Christian, Hayley; The University of Western Australia, School of Population Health<br>Triguero-Mas, Margarita; Instituto de Salud Global Barcelona<br>Cirach, Marta; Instituto de Salud Global Barcelona<br>van den Berg, Magdalena; EMGO Institute for Health and Care Research, VU University Medical Center<br>Maas, Jolanda; Vrije Universiteit Amsterdam, Department of Clinical Psychology<br>Gidlow, Christopher; Staffordshire University, Centre for Sport, Health and Exercise Research<br>Kruize, Hanneke; National Institute for Public Health and the Environment,, Centre of Environmental Health Research<br>Wendel-Vos, Wanda; National Institute for Public Health and the Environment,<br>Andrušaitytė, Sandra; 7. Department of Environmental Sciences, Vytautas Magnus University, Kaunas, Lithuania<br>Grazuleviciene, Regina; Vytauto Didziojo Universitetas, Department of Environmental Sciences<br>Litt, Jill; University of Colorado Boulder, Environmental Studies Program<br>Nieuwenhuijsen, Mark; Instituto de Salud Global de Barcelona (ISGlobal), Centre for International Health Research (CRESIB); Instituto de Salud Global de Barcelona (ISGlobal), Centre for Research in Environmental Epidemiology (CREAL) |
| <b>Primary Subject Heading</b>: | Epidemiology                                                                                                                                                                                                                                                                                                                                                                                                                                                                                                                                                                                                                                                                                                                                                                                                                                                                                                                                                                                                                                                                                                                                                                                                                                                                                            |
| Secondary Subject Heading:      | Public health                                                                                                                                                                                                                                                                                                                                                                                                                                                                                                                                                                                                                                                                                                                                                                                                                                                                                                                                                                                                                                                                                                                                                                                                                                                                                           |
| Keywords:                       | EPIDEMIOLOGY, PUBLIC HEALTH, MENTAL HEALTH                                                                                                                                                                                                                                                                                                                                                                                                                                                                                                                                                                                                                                                                                                                                                                                                                                                                                                                                                                                                                                                                                                                                                                                                                                                              |
|                                 |                                                                                                                                                                                                                                                                                                                                                                                                                                                                                                                                                                                                                                                                                                                                                                                                                                                                                                                                                                                                                                                                                                                                                                                                                                                                                                         |

SCHOLARONE™  
Manuscripts

1  
2  
3 Title4  
5 Dog ownership, the natural outdoor environment and health: a cross-sectional study  
67  
8 Authors  
910 Wilma L Zijlema<sup>abc\*</sup>, Hayley Christian<sup>d</sup>, Margarita Triguero-Mas<sup>abc</sup>, Marta Cirach<sup>abc</sup>, Magdalena van den  
11 Berg<sup>e</sup>, Jolanda Maas<sup>f</sup>, Christopher Gidlow<sup>g</sup>, Hanneke Kruize<sup>h</sup>, Wanda Wendel-Vos<sup>i</sup>, Sandra Andrusaityte<sup>j</sup>,  
12 Regina Grazuleviciene<sup>j</sup>, Jill Litt<sup>h</sup>, Mark J. Nieuwenhuijsen<sup>abc</sup>  
13  
1415  
16 Affiliations  
1718  
19  
20 <sup>a</sup> Barcelona Institute for Global Health (ISGlobal), Doctor Aiguader 88, 08003 Barcelona, Spain  
2122  
23 <sup>b</sup> Universitat Pompeu Fabra (UPF), Doctor Aiguader 88, 08003 Barcelona, Spain  
2425  
26 <sup>c</sup> CIBER Epidemiología y Salud Pública (CIBERESP), Melchor Fernández Almagro, 3-5, 28029 Madrid,  
27 Spain  
2829  
30 <sup>d</sup> School of Population and Global Health, The University of Western Australia, 35 Stirling Highway,  
31 Crawley, 6009, Perth, Australia  
3233  
34  
35 <sup>e</sup> Department of Public & Occupational Health and EMGO Institute for Health and Care research, VU  
36 University Medical Center, Amsterdam, the Netherlands  
3738  
39  
40 <sup>f</sup> Department of Clinical Psychology, Vrije Universiteit Amsterdam, Van der Boechorstraat 1, 1081 BT  
41 Amsterdam, Netherlands  
4243  
44  
45 <sup>g</sup> Centre for Health and Development, Staffordshire University, Leek Road, Stoke-on-Trent, ST4 7EP,  
46 United Kingdom  
4748  
49  
50 <sup>h</sup> Center for Sustainability, Environment and Health, National Institute for Public Health and the  
51 Environment (RIVM), Antonie van Leeuwenhoeklaan 9, 3721 MA Bilthoven, The Netherlands  
5253  
54  
55 <sup>i</sup> Centre for Nutrition, Prevention and Health Services, National Institute for Public Health and the  
56 Environment (RIVM), Antonie van Leeuwenhoeklaan 9, 3721 MA Bilthoven, The Netherlands  
57  
58  
59  
60

1  
2  
3 <sup>j</sup> Department of Environmental Sciences, Vytautas Magnus University, K. Donelaicio str. 58, 44248  
4  
5 Kaunas, Lithuania  
6

7  
8 <sup>h</sup> Environmental Studies Program, University of Colorado Boulder, 4001 Discovery Drive, Boulder, CO  
9  
10 80303, United States.  
11

12  
13  
14  
15 \*Corresponding author

16  
17 Wilma L Zijlema PhD

18  
19 Barcelona Institute for Global Health (ISGlobal)

20  
21 Barcelona Biomedical Research Park (PRBB)

22  
23 Doctor Aiguader 88, 08003 Barcelona, Spain

24  
25 Tel: +34 932147300, Fax: +34 93 214 73 02, E-mail: [wilma.zijlema@isglobal.org](mailto:wilma.zijlema@isglobal.org)  
26  
27  
28  
29  
30  
31  
32  
33  
34  
35  
36  
37  
38  
39  
40  
41  
42  
43  
44  
45  
46  
47  
48  
49  
50  
51  
52  
53  
54  
55  
56  
57  
58  
59  
60

## Abstract

### Objectives

Dog owners walking their dog in natural outdoor environments (NOE) may benefit from the physical activity facilitated by dog walking and from time spent in nature. However, it is unclear whether dog owners receive additional health benefits associated with having access to NOE above the physical activity benefit of walking with their dog. We investigated associations between dog ownership, walking, time spent in NOE, and health and whether these associations differed among those with good and poor access to NOE and those living in green and less green areas.

### Design

Cross-sectional study

### Setting

The Positive Health Effects of the Natural Outdoor Environment in Typical Populations in Different Regions in Europe (PHENOTYPE) project.

### Participants

n=3586 adults from Barcelona (Spain), Doetinchem (the Netherlands), Kaunas (Lithuania), and Stoke-on-Trent (United Kingdom).

### Data collection and analysis

We calculated access to NOE with land maps and residential surrounding greenness with satellite data. Leisure time walking, time spent in NOE, and general and mental health status were measured using validated questionnaires. Associations were estimated using multilevel analysis with a random intercept defined at the neighborhood level.

### Results

Dog ownership was associated with higher rates of leisure time walking and time spending in NOE (incidence rate ratio 1.65, 95% CI 1.65, 1.66 and 1.48, 95% CI 1.45, 1.51 respectively). These

1  
2  
3 associations were stronger in those with better access to NOE and in greener areas. No consistent  
4  
5 associations were found between dog ownership and perceived general or mental health status.  
6  
7

## 8 Conclusions

9  
10 Compared with non-dog owners, dog owners walked more and spent more time in NOE, especially in  
11  
12 those with access to NOE and in greener areas. The health implications of these relationships should be  
13  
14 further investigated. In a largely physically inactive society, dog walking in NOE may be a simple way of  
15  
16 promoting physical activity and health.  
17  
18  
19  
20  
21

- 22 • Strengths and limitations This is one of the first studies from mainland Europe, and the multi-city  
23 approach revealed differences between cities concerning dog ownership and health.
- 24 • The assessment of access to natural outdoor environments suitable for physical activity using  
25 road network buffers was chosen to optimally capture the relation with people's walking  
26  
27 behavior.  
28  
29
- 30 • The use of multiple exposure indicators of natural outdoor environments enabled studying these  
31  
32 exposure indicators simultaneously, and could help understand what metric best predicts the  
33  
34 health benefits associated with natural outdoor environments.  
35  
36
- 37 • We cannot establish the direction of the observed relationships because of the cross-sectional  
38  
39 study design.  
40  
41  
42  
43
- 44 • We had no detailed information about dog ownership (e.g. level of attachment, duration of dog  
45  
46 ownership, primary caretaker) and we did not know if the time spent in natural outdoor  
47  
48 environments and leisure time walking was undertaken together with the dog.  
49  
50  
51  
52  
53  
54

## 55 Competing interests

56  
57  
58 None declared  
59  
60

### Funding

This work was supported by the European Community's Seventh Framework Programme (FP7/2007-2013) under grant agreement no 282996. W.L. Zijlema is supported by a Sara Borrell grant from the Instituto de Salud Carlos III (CD17/00195). H. Christian is supported by an Australian National Heart Foundation Future Leader Fellowship (#100794). ISGlobal is a member of the CERCA Programme, Generalitat de Catalunya. The funders had no role in study design, data collection and analysis, decision to publish, or preparation of the manuscript.

### Author's Contributions

WLZ conducted the analyses. WLZ, HC and JL drafted the manuscript. MTM, MC, MB, JM, CG, HK, WWV, SA, RG, MJN were involved in the design of and data acquisition in the PHENOTYPE study. All authors provided input on the manuscript and agreed with the final version.

### Acknowledgements

The authors thank Sandra Márquez for her valuable advice in the statistical analyses and the PHENOTYPE respondents for their contribution.

### Data sharing statement

Additional data are available upon request from the corresponding author (WLZ:

[Wilma.zijlema@isglobal.org](mailto:Wilma.zijlema@isglobal.org)).

## INTRODUCTION

In an urbanized world, where people spend the majority of their time indoors [1], physical inactivity is a major public health problem [2]. It not only leads to adverse health effects but it is also a large economic burden for society [3]. Physical activity behavior is influenced by the built environment [4]. Aspects of the built environment such as the availability of parks are associated with increased physical activity, especially walking [5,6]. It is important to identify sustainable built environment interventions for increasing physical activity and improving health.

Dog walking has been identified as a simple way of promoting physical activity [7–10]. There is strong evidence to suggest that dog owners walk more often and are more physically active than non-dog owners [10–12]. This association has been observed in adults [13,14], adolescents and children [15–17], in groups with potential limited mobility such as older adults [18–20] and in people with a chronic disease [21]. Consequently, dog walking may lead to better health over time, with benefits ranging from improved wellbeing [22] to fewer doctor visits [23] and a lower risk of cardiovascular disease and mortality [24].

However, not all studies show health benefits of dog ownership [25–27] and a large proportion of dog owners do not walk their dog [28,29]. Of the various factors that influence dog walking behavior, aspects of the built environment seem to be among them [9]. Supportive environments, such as neighborhoods with parks and other types of green infrastructure, are associated with higher physical activity levels of dog owners and are important for promoting dog walking [8,9,30]. Specifically, better park access and park quality (e.g. presence of dog litter bags, water sources) were related to dog walking [9,31,32]. Not all dog owners have access to parks thus improving access to parks in residential areas could be important for facilitating dog walking, especially since local parks are a common place for dog walking [33]. Parks also provide an opportunity for nature contact. Spending time in natural outdoor environments (NOE), such as parks, has been associated with health benefits, for example through facilitating stress reduction, restoration, and social contact [34–36]. Dog owners walking their dog in NOE may benefit from the physical activity facilitated by owning a dog as well as time spent in nature. However, it is unclear whether dog owners receive additional health benefits associated with having access to NOE. According to the theories of health behavior [37] and the social ecological framework [38], identifying the environmental factors that influence health outcomes (e.g. access to NOE) could lead to potential intervention strategies that could eventually improve health.



1  
2  
3 The aim of this study was to investigate the relationships between dog ownership, walking, the NOE and  
4 health. In line with above-mentioned studies and health behavior theories, we hypothesized that dog  
5 owners walk more, spend more time in NOE and are healthier than non-dog owners, and that the health  
6 benefits are more apparent in dog owners within green neighborhoods and with access to NOE compared  
7 to those in less green areas and with poor NOE access. We therefore investigated the associations  
8 between dog ownership, leisure time walking, time spent in NOE, and general and mental health status,  
9 and whether these associations differed among those with good and poor access to NOE and those living  
10 in green and less green areas.  
11  
12  
13  
14  
15  
16  
17  
18

## 19 METHOD

### 20 Study design and participants

21  
22 This study analyzed data from the Positive Health Effects of the Natural Outdoor environment in Typical  
23 Populations in different regions in Europe (PHENOTYPE) project. Respondents were recruited from 30  
24 different neighborhoods in Barcelona (Spain), Doetinchem (the Netherlands), Kaunas (Lithuania), and  
25 Stoke-on-Trent (United Kingdom) [39]. Neighborhoods were selected to maximize variability in access to  
26 NOE and socioeconomic status. In order to arrive at a final sample of approximately 1000 respondents  
27 per city, a random sample of 30 to 35 addresses per neighborhood were mailed with a letter explaining the  
28 purpose of the project after which they were visited by interviewers. In Doetinchem, persons were asked  
29 to send back an answer card to indicate their willingness to participate before they were visited by the  
30 interviewers; and in Kaunas, persons were approached by mail to fill out postal questionnaires.  
31 Respondents needed to have an age between 18 and 75 years and to be able to speak the local language.  
32 Data were collected using interview-administered questionnaires (except in Kaunas, where self-  
33 administered questionnaires were used) at respondents' residences during May-November 2013. The  
34 study was conducted in accordance with the Declaration of Helsinki. All respondents provided written  
35 informed consent and study protocols were approved by local ethical committees.  
36  
37  
38  
39  
40  
41  
42  
43  
44  
45  
46  
47  
48  
49  
50

### 51 Patient and Public Involvement

52  
53 Participant and stakeholder involvement and dissemination of results was organized in multiple ways  
54 through symposia, workshops, online media channels and newsletters.  
55  
56  
57  
58  
59

### 60 Data

1  
2  
3 Explanatory variables

4  
5 Dog ownership

6  
7 Dog ownership was assessed using the question: “Do you own a dog” (yes; no).  
8  
9

10  
11 *Access to NOE* was estimated with land use maps from local sources in each city. Only NOE that were  
12 publically available; suitable for physical activity; and at least 0.5 hectare (e.g. parks, semi-natural/natural  
13 land, formal recreation grounds) or 0.25 hectare (natural/green corridors) were selected as these were  
14 relevant for physical activity [40] and therefore potentially relevant in terms of the health benefits of NOE  
15 for dog owners. Road network buffers were chosen over circular buffers in order to capture a more  
16 realistic measure of NOE accessibility on foot [41], which may be most relevant to dog walking. We  
17 furthermore used three predetermined buffer sizes to obtain a better understanding of what distance to  
18 NOE is most beneficial to health [42]. Using GIS we constructed three indicators: (1) the number of, and  
19 (2) the total surface area NOE within road network buffers of 300m, 500m, and 1000m, and (3) the road  
20 network distance to the nearest NOE (Figure 1). The number of and area of NOE were dichotomized  
21 using the city-specific median values. Distance to nearest NOE was dichotomized using a 300m cut off  
22 according to guidelines [43].  
23  
24  
25  
26  
27  
28  
29  
30  
31  
32  
33

34  
35 *Residential surrounding greenness* was assessed using the normalized difference vegetation index  
36 (NDVI). The NDVI is a measure of vegetation and represents the photosynthetic activity in an area  
37 [40,44]. Healthy vegetation absorbs most visible light and reflects large parts of near-infrared light, while  
38 sparse vegetation reflects more visible light and less near-infrared light. Based on this distinction a value  
39 between -1 and +1 is calculated, with higher values indicating a higher density of green vegetation [44].  
40 The NDVI was derived from Landsat 5 and 8 satellite images at a resolution of 30 m × 30 m on cloud-  
41 free images within the greenest season (April to September) in the relevant period for this study (2011-  
42 2013). Average NDVI values were calculated within (Euclidean) buffers of 100m, 300m, and 500m  
43 around the residence, as used in previous research [45,46], and dichotomized using the city-specific  
44 median value.  
45  
46  
47  
48  
49  
50  
51  
52  
53

54  
55 (Figure 1 here)

56  
57  
58 Figure 1. Example of different buffer types and the distance to natural outdoor environments from a  
59 residential address.  
60

## Outcome variables

### Leisure time walking

Walking in leisure time was assessed by the following questions: “When thinking about a normal week in the past month how many days per week do you walk in your leisure time” and “How much time (minutes) per day do you spend walking in your leisure time”. These items were derived from the short questionnaire to assess health-enhancing physical activity (SQUASH) [47]. The SQUASH is a valid measure of physical activity [47,48]. Duration and frequency of walking was multiplied to create a composite variable of minutes per week of leisure time walking.

### Time spent in NOE

NOE were defined as all public and private outdoor spaces that contain ‘green’ and/or ‘blue’ natural elements such as street trees, forests, city parks and natural parks/reserves, and also included all types of waterbodies such as canals, ponds, creeks, rivers, beaches. Time spent in NOE was assessed using two questions: “How often did you visit/go in the last 4 weeks on purpose to green or blue space near your home?” (5-point response scale ranging from ‘never’ (1) to ‘almost daily’ (5)); and “How much time did you spend in a green or blue space near your home?” (4-point response scale ranging from <1 h (1) to 6–10 h (4)). A composite variable was created to determine the amount of time (frequency of visits multiplied by average duration per visit) respondents spent in NOE near home per month. As frequency and duration were assessed with questions with categorical response scales, the central value of each answer category for frequency were multiplied with central value of each answer category for duration (e.g. 3-5 h/month was coded as 4 h/month).

### General health status

General health status was assessed using the question: “In general what would you say your health is?” (5 point response scale: excellent to poor), which was derived from the Medical Outcome Study Short Form (SF-36) [49]. Scores were dichotomized into “fair or poor” (0) and “excellent, very good, and good” (1). This single question has been found to be associated with poor health outcomes in the general population [50,51].

### Mental health

1  
2  
3 Mental health was assessed using the Short Form Health Survey (SF-36) mental health subscale,  
4 including five items (e.g. nervousness, depression), and is a valid and reliable measure of mental health  
5 [52]. Respondents rated the occurrence of symptoms in the past four weeks on a 6-point scale ranging  
6 from “all of the time” (1) to “none of the time” (6). A sum score was calculated and transformed into a  
7 scale ranging from 0 to 100 according to guidelines [49] with higher scores indicating better mental  
8 health. When  $\geq 3$  items were missing, respondents were excluded from the analyses, but when 1-2 items  
9 were missing, missing values were replaced by the average score of the other items. We did this for 17  
10 respondents. Analyses including and excluding these 17 respondents did not alter the results.  
11  
12  
13  
14  
15  
16  
17  
18

### 19 Covariates and other variables

20 Information about sociodemographic factors included sex, age, educational level (primary school or no  
21 education; secondary school/ further education (up to 18 years); university degree or higher), household  
22 composition (alone; with partner (without children); with children <12 yr old; with children >12 yr old;  
23 and other), perceived income situation (cannot make ends meet; enough to get by; comfortable),  
24 frequency of contact with family and/or friends ((almost daily;  $\geq 1$  per week; 1-3 per month or less), and  
25 whether respondents feel part of a group of friends ((totally) agree; neutral, (totally) disagree). We also  
26 included perceived safety of neighborhood NOE (very satisfied; satisfied; neutral; dissatisfied; very  
27 dissatisfied). Health-related factors included disability restricting mobility (yes; no), one or more chronic  
28 diseases (yes; no), body mass index (based on self reported height and weight: healthy weight  $\leq 25$  kg/m<sup>2</sup>;  
29 overweight 25-30 kg/m<sup>2</sup>; obese >30 kg/m<sup>2</sup>), and smoking status (current; former; never). Neighborhood  
30 socioeconomic status (SES, low; intermediate; high) was based on country-specific data (Barcelona:  
31 deprivation index based on census data 2001 [53]; Doetinchem: average monthly household income per  
32 6-digit zip code level [54]; Kaunas: neighborhood education level [55]; Stoke-on-Trent: English indices  
33 of deprivation 2010 [56]).  
34  
35  
36  
37  
38  
39  
40  
41  
42  
43  
44  
45  
46  
47  
48  
49  
50

### 51 Statistical analyses

52 Equivalence tests with Benjamini-Hochberg adjustments for false discovery rates (5%) [57] were used to  
53 test for differences between dog owner and non-dog owner characteristics. To investigate the association  
54 between dog ownership, leisure time walking, time spent in NOE, and general and mental health status,  
55  
56  
57  
58  
59  
60

1  
2  
3 and whether these associations differed for respondents with good/poor access to NOE and high/low  
4 residential surrounding greenness, we investigated:

- 5  
6  
7 1. The associations between dog ownership, leisure time walking, time spent in NOE, general  
8 health status, and mental health.
- 9  
10 2. The associations specified at 1, stratified by NOE access (good and poor) and by residential  
11 surrounding greenness (high and low) to investigate whether the associations between dog  
12 ownership and the outcomes differ in these subgroups.  
13  
14  
15  
16

17  
18 Associations were estimated using multilevel analysis with a random intercept defined at the  
19 neighborhood level. Associations with leisure time walking and time spent in NOE were estimated with  
20 Poisson regression which is used to model count variables; associations with general health status were  
21 estimated with logistic regression because of the dichotomous nature of the data; and since mental health  
22 scores were normally distributed, associations were estimated with linear regression. Models were  
23 adjusted for age, sex, education level, household composition, perceived income situation, neighborhood  
24 SES, NOE safety, disability restricting mobility, and chronic diseases and were selected because of an  
25 assumed relation with dog ownership, walking, time spent in NOE and health. The main associations (as  
26 specified at 1) were also estimated for the cities separately. Stratified analyses by access to NOE and  
27 residential surrounding greenness were undertaken with indicators in all buffer sizes, but the 500m buffer  
28 was reported in the main table and the remaining buffer sizes in the Supplement. Analyses were based on  
29 complete cases (missing data differed by outcome and ranged between n=360 and 416). All analyses were  
30 performed in STATA 14.2 [58].  
31  
32  
33  
34  
35  
36  
37  
38  
39  
40  
41  
42

43  
44 Sensitivity analyses were undertaken to investigate whether additional adjustment for covariates changed  
45 the associations. Additional adjustments were carried out for characteristics that were found to differ  
46 between dog owners and non-dog owners and that may relate to health (smoking and BMI), or that have  
47 been found to be mediators of the dog ownership-health relationship (frequency of contact with family  
48 and/or friends, and whether respondents feel part of a group of friends) [59,60].  
49  
50  
51  
52  
53  
54  
55  
56  
57  
58  
59  
60

## RESULTS

### Population characteristics

Respondents were on average 51.4 (SD 15.9) years old and 54.9% were female. A total of 1109 (30.9%) respondents were dog owners. Dog owners compared with non-dog owners were on average the same age, had similar educational attainment but more were female (59.6% vs. 53.3%) and reported lower perceived income security. Dog ownership varied across cities, with it being highest in Kaunas (41.1%) and lowest in Doetinchem (16.5%). Dog owners walked more and spent more time in NOE compared with non-dog owners. However, dog owners had a lower perceived general and mental health status compared with non-dog owners. Dog owners also reported more frequently that physical constraints restricted their mobility, had more often a chronic disease, and had higher BMI than non-dog owners (Table 1).

(Table 1 here)

### Dog ownership, leisure time walking, time spent in NOE and health

Adjusted multilevel models showed that dog ownership was associated with increased rates of leisure time walking (incidence rate ratio [IRR]= 1.65, 95% CI 1.65, 1.66) compared with non-dog owners. Dog ownership was also associated with increased rates of spending time in NOE (IRR= 1.48, 95% CI 1.45, 1.51) compared with non-dog owners. There were no differences in perceived general health status and mental health between dog owners and non-dog owners. City-specific analyses showed similar results, with some exceptions: a positive association between dog ownership and perceived general health in Barcelona (OR=1.90, 95% CI 1.01, 3.56); and a positive association between dog ownership and mental health in Stoke-on-Trent ( $\beta$ = 2.61, 95% CI 0.35, 4.86) (Table 2 and Supplemental Table S1).

(Table 2 here)

### Stratified analyses by access to NOE and residential surrounding greenness

Stratified analyses showed that the association between dog ownership and leisure time walking for those with the highest number of NOE around their home (IRR= 1.72, 95% CI 1.71, 1.73) was stronger than for those with little NOE (IRR= 1.61, 95% CI 1.60, 1.62). Similar results were observed for those living within 300m of a NOE, and for those with a higher amount of residential surrounding greenness, but not

1  
2  
3 consistently for larger areas of NOE. Stronger associations between dog ownership and walking were  
4 predominantly observed for the access to NOE and surrounding greenness indicators in larger buffer sizes  
5  
6 (Table 3 and Supplemental Table S2).  
7  
8

9  
10 The association between dog ownership and time spent in NOE by the number of NOE was also stronger  
11 for those with a higher number of NOE (IRR 1.51, 95% CI 1.46, 1.56) compared to those with a lower  
12 number of NOE (IRR 1.43, 95% CI 1.39, 1.47). We also observed stronger associations between dog  
13 ownership and time spent in NOE for those with larger areas of NOE, for those living within 300m of a  
14 NOE and for those with a higher amount of residential surrounding greenness (Table 3 and Supplemental  
15 Table S2). The stronger associations between dog ownership and time spent in NOE for those with better  
16 access to NOE and with more residential surrounding greenness were consistent across all buffer sizes  
17 except for residential surrounding greenness within 100m (Supplemental Table S2).  
18  
19

20  
21 There were no associations between dog ownership and perceived general health status when stratifying  
22 by access to NOE or residential surrounding greenness. Similarly, there was no indication for an  
23 association between dog ownership and mental health in groups with high or low access to NOE and with  
24 high or low residential surrounding greenness (Table 3).  
25  
26

27  
28  
29  
30  
31  
32  
33  
34 (Table 3 here)  
35  
36  
37  
38  
39

#### 40 Sensitivity analysis

41  
42 Additional adjustments for smoking, BMI, frequency of contact with family and/or friends, and whether  
43 respondents feel part of a group of friends, did not change the results (results available upon request).  
44  
45  
46  
47  
48  
49

#### 50 DISCUSSION

51  
52 Having a dog was associated with more leisure time walking and time spent in NOE near home compared  
53 with not having a dog. Moreover, the differences in walking and time spent in NOE between dog owners  
54 and non-dog owners were larger when there was good access to NOE and a high amount of residential  
55 surrounding greenness. There was no consistent evidence for an association between dog ownership and  
56 perceived general and mental health status. Only dog owners from Stoke-on-Trent had better mental  
57  
58  
59  
60

1  
2  
3 health compared with non-dog owners, and dog owners from Barcelona had better perceived general  
4 health compared to non-dog owners.  
5  
6

7  
8 Prior studies have also observed links between NOE, dog ownership and physical activity. In support of  
9  
10 our findings, a UK study of older adults reported that neighborhood greenness was associated with a  
11 smaller decline in physical activity over time, and that dog walking explained up to 50% of the variance  
12 in the relationship between greenness and outdoor physical activity [61]. Our findings were also  
13 consistent with a Danish study that found that dog ownership was a major determinant of park visits,  
14 especially those parks closest to the residence [33]. Our study adds to the evidence base by including  
15 multiple exposure indicators of NOE which enabled studying multiple exposure indicators of NOE  
16 simultaneously, and could help understand what metric best predicts the health benefits associated with  
17 NOE [34,35,39]. We found that dog owners spent more time in NOE than non-dog owners, but dog  
18 ownership was not consistently related to perceived mental or general health status. Dog ownership was  
19 only related to better perceived general or mental health in Barcelona and Stoke-on-Trent, the two cities  
20 where respondents were the least active and spent the least time in NOE. This suggests that the health  
21 benefits of dog ownership exist when walking and time spent in NOE is low to begin with. Because we  
22 found no consistent evidence for health benefits for dog owners with better availability of NOE, future  
23 studies could also investigate subjective indicators of NOE, including satisfaction and importance, and  
24 neighborhood aesthetics [62].  
25  
26  
27  
28  
29  
30  
31  
32  
33  
34  
35  
36  
37  
38

39 Although the cross-sectional nature of our study does not allow for understanding the longitudinal effects  
40 of dog ownership on health, it is possible that people with physical constraints and chronic diseases more  
41 often decide to have a dog, for example following doctor's advice, in order to stay mobile [24]. Similarly,  
42 another study reported that dog owners more often had asthma, and a higher BMI compared with non-dog  
43 owners [26]. Furthermore, an Australian study found that although pet ownership was associated with  
44 higher levels of physical activity, it was also associated with higher self-reported BMI, higher diastolic  
45 blood pressure, and smoking [25]. We found that despite the physical constraints and chronic diseases,  
46 dog owners engaged in more leisure time walking than non-dog owners. We hypothesize that the extra  
47 physical activity facilitated by dog walking may offset some of the other negative health risk factors dog  
48 owners have, and could eventually yield longer term health benefits. This may especially occur in green  
49 neighborhoods, when there is access to NOE and when the residential environment promotes walking.  
50  
51  
52  
53  
54  
55  
56  
57  
58  
59  
60



1  
2  
3 Limitations of this study include the lack of information about the dog (e.g. breed, age, temperament), the  
4 dog owner's level of attachment to their dog, the duration of dog ownership, and if the respondent was the  
5 primary carer of the dog. Such factors may have influenced the potential health benefits of dog  
6 ownership, but we were unable to take these factors into account. We further did not know if the time  
7 spent in NOE and leisure time walking was undertaken together with the dog, and whether time spent in  
8 NOE was time spent walking. Future research should measure specific aspects of dog ownership and  
9 should use measures of behavior such as time spent in NOE with and without dog and leisure time  
10 walking undertaken with and without the dog. A limitation of self-reporting walking habits is potential  
11 overstatement of the amount of walking. Although data collection was similar in each city, data on  
12 neighborhood SES was based on country-specific data and this might have complicated comparisons  
13 between cities. Finally, we cannot establish the direction of the observed relationships because of the  
14 cross-sectional study design. For example, people who are already physically active and visit NOE may  
15 decide to get a dog, instead of dogs motivating their owners to walk and visit NOE more. Strengths  
16 include the multi-city approach, which revealed differences between cities concerning dog ownership and  
17 health. It is also one of the first studies from mainland Europe, since the majority of research has been  
18 carried out in North America, Australia, and in the UK. More international studies about dog ownership  
19 and health are needed. Finally, our measure of access to NOE was specific to environments that were  
20 suitable for physical activity. Also, for access to NOE, we used road network buffers over circular buffers  
21 which better capture people's walking behavior; and we used varying buffer sizes to obtain a better  
22 understanding of what distance to NOE is most beneficial to health [42].  
23  
24  
25  
26  
27  
28  
29  
30  
31  
32  
33  
34  
35  
36  
37  
38  
39  
40

## 41 42 Conclusions

43  
44  
45 Dog owners performed more leisure time walking and spent more time in NOE compared with non-dog  
46 owners, especially when they had access to NOE and when they lived in green areas. There was no  
47 consistent relationship between dog ownership and better perceived general or mental health status. In a  
48 largely physically inactive society where many people remain indoors, dog walking in parks or other  
49 NOE may be an opportunity to engage people in walking behavior as a path towards better health. Cities  
50 should therefore ensure that there is access to NOE for dog owners and provide green infrastructure in  
51 order to promote dog walking. Future research should focus on natural experiments and evaluation of  
52 intervention strategies to increase dog owners' access to NOE.  
53  
54  
55  
56  
57  
58  
59  
60

## REFERENCES

- 1 Schweizer C, Edwards RD, Bayer-Oglesby L, *et al*. Indoor time–microenvironment–activity patterns in seven regions of Europe. *J Expo Sci Environ Epidemiol* 2007;**17**:170–81. doi:10.1038/sj.jes.7500490
- 2 Hallal PC, Andersen LB, Bull FC, *et al*. Global physical activity levels: Surveillance progress, pitfalls, and prospects. *Lancet* 2012;**380**:247–57. doi:10.1016/S0140-6736(12)60646-1
- 3 Ding D, Lawson KD, Kolbe-Alexander TL, *et al*. The economic burden of physical inactivity: a global analysis of major non-communicable diseases. *Lancet* 2016;**388**:1311–24. doi:10.1016/S0140-6736(16)30383-X
- 4 McCormack GR, Shiell A. In search of causality: a systematic review of the relationship between the built environment and physical activity among adults. *Int J Behav Nutr Phys Act* 2011;**8**:125. doi:10.1186/1479-5868-8-125
- 5 Sallis JF, Cerin E, Conway TL, *et al*. Physical activity in relation to urban environments in 14 cities worldwide: a cross-sectional study. *Lancet* 2016;**387**:2207–17. doi:10.1016/S0140-6736(15)01284-2
- 6 Schipperijn J, Cerin E, Adams MA, *et al*. Access to parks and physical activity: An eight country comparison. *Urban For Urban Green* 2017;**27**:253–63. doi:10.1016/j.ufug.2017.08.010
- 7 Lail P, McCormack GR, Rock M, *et al*. Does dog-ownership influence seasonal patterns of neighbourhood-based walking among adults? A longitudinal study. *BMC Public Health* 2011;**11**:148. doi:10.1186/1471-2458-11-148
- 8 Cutt H, Giles-Corti B, Knuiiman M, *et al*. Dog ownership, health and physical activity: A critical review of the literature. *Health Place* 2007;**13**:261–72. doi:10.1016/j.healthplace.2006.01.003
- 9 Westgarth C, Christley RM, Christian HE, *et al*. How might we increase physical activity through dog walking?: A comprehensive review of dog walking correlates. *Int J Behav Nutr Phys Act* 2014;**11**:83. doi:10.1186/1479-5868-11-83

- 1  
2  
3 10 Christian H, Bauman A, Epping JN, *et al.* Encouraging Dog Walking for Health Promotion and  
4 Disease Prevention. *Am J Lifestyle Med* 2018;**12**:233–43. doi:10.1177/1559827616643686  
5  
6  
7  
8 11 Christian HE, Westgarth C, Bauman A, *et al.* Dog ownership and physical activity: a review of  
9 the evidence. *J Phys Act Health* 2013;**10**:750–9. <http://www.ncbi.nlm.nih.gov/pubmed/23006510>  
10  
11  
12 12 Toohey AM, Rock MJ. Unleashing their potential: a critical realist scoping review of the  
13 influence of dogs on physical activity for dog-owners and non-owners. *Int J Behav Nutr Phys Act*  
14 2011;**8**:46. doi:10.1186/1479-5868-8-46  
15  
16  
17  
18 13 Hoerster KD, Mayer JA, Sallis JF, *et al.* Dog walking: Its association with physical activity  
19 guideline adherence and its correlates. *Prev Med (Baltim)* 2011;**52**:33–8.  
20  
21  
22  
23  
24  
25  
26 14 Coleman KJ, Rosenberg DE, Conway TL, *et al.* Physical activity, weight status, and  
27 neighborhood characteristics of dog walkers. *Prev Med (Baltim)* 2008;**47**:309–12.  
28  
29  
30  
31  
32  
33 15 Westgarth C, Boddy LM, Stratton G, *et al.* A cross-sectional study of frequency and factors  
34 associated with dog walking in 9–10 year old children in Liverpool, UK. *BMC Public Health*  
35 2013;**13**:822. doi:10.1186/1471-2458-13-822  
36  
37  
38  
39 16 Christian H, Trapp G, Lauritsen C, *et al.* Understanding the relationship between dog ownership  
40 and children’s physical activity and sedentary behaviour. *Pediatr Obes* 2013;**8**:392–403.  
41  
42  
43  
44  
45  
46 17 Sirard JR, Patnode CD, Hearst MO, *et al.* Dog Ownership and Adolescent Physical Activity. *Am*  
47  
48  
49  
50 18 Shibata A, Oka K, Inoue S, *et al.* Physical Activity of Japanese Older Adults Who Own and Walk  
51  
52  
53  
54  
55 19 Feng Z, Dibben C, Witham MD, *et al.* Dog ownership and physical activity in later life: A cross-  
56  
57  
58  
59  
60

- 1  
2  
3 20 Wu YT, Luben R, Jones A. Dog ownership supports the maintenance of physical activity during  
4 poor weather in older English adults: Cross-sectional results from the EPIC Norfolk cohort. *J*  
5 *Epidemiol Community Health* 2017;**71**:905–11. doi:10.1136/jech-2017-208987  
6  
7  
8  
9  
10 21 Arbillaga-Etxarri A, Gimeno-Santos E, Barberan-Garcia A, *et al.* Socio-environmental correlates  
11 of physical activity in patients with chronic obstructive pulmonary disease (COPD). *Thorax*  
12 2017;:thoraxjnl-2016-209209. doi:10.1136/thoraxjnl-2016-209209  
13  
14  
15  
16 22 McConnell AR, Brown CM, Shoda TM, *et al.* Friends with benefits: On the positive  
17 consequences of pet ownership. *J Pers Soc Psychol* 2011;**101**:1239–52. doi:10.1037/a0024506  
18  
19  
20  
21 23 Headey B, Grabka MM. Pets and Human Health in Germany and Australia: National  
22 Longitudinal Results. *Soc Indic Res* 2007;**80**:297–311. doi:10.1007/s11205-005-5072-z  
23  
24  
25  
26 24 Mubanga M, Byberg L, Nowak C, *et al.* Dog ownership and the risk of cardiovascular disease  
27 and death – a nationwide cohort study. *Sci Rep* 2017;**7**:15821. doi:10.1038/s41598-017-16118-6  
28  
29  
30 25 Parslow RA, Jorm AF. Pet ownership and risk factors for cardiovascular disease: another look.  
31 *Med J Aust* 2003;**179**:466–8.  
32  
33  
34  
35 26 Saunders J, Parast L, Babey SH, *et al.* Exploring the differences between pet and non-pet owners:  
36 Implications for human-animal interaction research and policy. *PLoS One* 2017;**12**:e0179494.  
37 doi:10.1371/journal.pone.0179494  
38  
39  
40  
41 27 Torske MO, Krokstad S, Stamatakis E, *et al.* Dog ownership and all-cause mortality in a  
42 population cohort in Norway: The HUNT study. *PLoS One* 2017;**12**:e0179832.  
43 doi:10.1371/journal.pone.0179832  
44  
45  
46  
47  
48 28 Richards EA. Does Dog Walking Predict Physical Activity Participation: Results From a National  
49 Survey. *Am J Health Promot* 2016;**30**:323–30. doi:10.1177/0890117116646335  
50  
51  
52  
53 29 Richards EA, Ogata N, Cheng C-W. Evaluation of the Dogs, Physical Activity, and Walking  
54 (Dogs PAW) Intervention: A Randomized Controlled Trial. *Nurs Res* 2016;**65**:191–201.  
55 doi:10.1097/NNR.0000000000000155  
56  
57  
58  
59 30 Richards EA, McDonough MH, Edwards NE, *et al.* Psychosocial and environmental factors  
60

- 1  
2  
3 associated with dog-walking. *Int J Heal Promot Educ* 2013;**51**:198–211.  
4  
5 doi:10.1080/14635240.2013.802546  
6  
7  
8 31 Christian (nee Cutt) H, Giles-Corti B, Knuiman M. ‘I’m Just a’-Walking the Dog’ Correlates of  
9  
10 Regular Dog Walking. *Fam Community Health* 2010;**33**:44–52.  
11  
12 doi:10.1097/FCH.0b013e3181c4e208  
13  
14  
15 32 Cutt H, Giles-Corti B, Knuiman M. Encouraging physical activity through dog walking: Why  
16  
17 don’t some owners walk with their dog? *Prev Med (Baltim)* 2008;**46**:120–6.  
18  
19 doi:10.1016/j.ypmed.2007.08.015  
20  
21  
22 33 Schipperijn J, Stigsdotter UK, Randrup TB, *et al.* Influences on the use of urban green space – A  
23  
24 case study in Odense, Denmark. *Urban For Urban Green* 2010;**9**:25–32.  
25  
26 doi:10.1016/j.ufug.2009.09.002  
27  
28  
29 34 Frumkin H, Bratman GN, Breslow SJ, *et al.* Nature Contact and Human Health: A Research  
30  
31 Agenda. *Environ Health Perspect* 2017;**125**:75001. doi:10.1289/EHP1663  
32  
33  
34 35 Nieuwenhuijsen MJ, Khreis H, Triguero-Mas M, *et al.* Fifty shades of green. *Epidemiology*.  
35  
36 2017;**28**:63–71. doi:10.1097/EDE.0000000000000549  
37  
38  
39 36 Markevych I, Schoierer J, Hartig T, *et al.* Exploring pathways linking greenspace to health:  
40  
41 Theoretical and methodological guidance. *Environ Res* 2017;**158**:301–17.  
42  
43 doi:10.1016/j.envres.2017.06.028  
44  
45  
46 37 Brug J, Oenema A, Ferreira I. Theory, evidence and Intervention Mapping to improve behavior  
47  
48 nutrition and physical activity interventions. *Int J Behav Nutr Phys Act* 2005;**2**:2.  
49  
50 doi:10.1186/1479-5868-2-2  
51  
52  
53 38 Stokols D. Establishing and maintaining healthy environments. Toward a social ecology of health  
54  
55 promotion. *Am Psychol* 1992;**47**:6–22. <http://www.ncbi.nlm.nih.gov/pubmed/1539925>  
56  
57  
58 39 Nieuwenhuijsen MJ, Kruize H, Gidlow C, *et al.* Positive health effects of the natural outdoor  
59  
60 environment in typical populations in different regions in Europe (PHENOTYPE): a study  
programme protocol. *BMJ Open* 2014;**4**:e004951. doi:10.1136/bmjopen-2014-004951

- 1  
2  
3 40 Smith G, Cirach M, Swart W, *et al.* Characterisation of the natural environment: quantitative  
4 indicators across Europe. *Int J Health Geogr* 2017;**16**:16. doi:10.1186/s12942-017-0090-z  
5  
6  
7  
8 41 Oliver LN, Schuurman N, Hall AW. Comparing circular and network buffers to examine the  
9 influence of land use on walking for leisure and errands. *Int J Health Geogr* 2007;**6**:41.  
10  
11 doi:10.1186/1476-072X-6-41  
12  
13  
14 42 Browning M, Lee K. Within What Distance Does ‘Greenness’ Best Predict Physical Health? A  
15 Systematic Review of Articles with GIS Buffer Analyses across the Lifespan. *Int J Environ Res*  
16  
17  
18  
19  
20  
21 43 Annerstedt van den Bosch M, Mudu P, Uscila V, *et al.* Development of an urban green space  
22 indicator and the public health rationale. *Scand J Public Health* 2016;**44**:159–67.  
23  
24  
25  
26  
27  
28 44 Weier J, Herring D. Measuring Vegetation (NDVI & EVI).  
29  
30  
31  
32  
33  
34 45 Dadvand P, Bartoll X, Basagaña X, *et al.* Green spaces and General Health: Roles of mental  
35 health status, social support, and physical activity. *Environ Int* 2016;**91**:161–7.  
36  
37  
38  
39  
40  
41 46 McEachan RRC, Prady SL, Smith G, *et al.* The association between green space and depressive  
42 symptoms in pregnant women: moderating roles of socioeconomic status and physical activity. *J*  
43  
44  
45  
46  
47  
48 47 Wendel-Vos GCW, Schuit AJ, Saris WHM, *et al.* Reproducibility and relative validity of the  
49 short questionnaire to assess health-enhancing physical activity. *J Clin Epidemiol* 2003;**56**:1163–  
50  
51  
52  
53  
54  
55 48 van Poppel MNM, Chinapaw MJM, Mekkink LB, *et al.* Physical Activity Questionnaires for  
56 Adults. *Sport Med* 2010;**40**:565–600. doi:10.2165/11531930-000000000-00000  
57  
58  
59  
60 49 Ware JE, Sherbourne CD. The Mos 36-Item Short-Form Health Survey (Sf-36) .1. Conceptual-  
Framework and Item Selection. *Med Care* 1992;**30**:473–83. doi:10.1097/00005650-199206000-

- 1  
2  
3 00002  
4  
5  
6 50 Mavaddat N, Kinmonth AL, Sanderson S, *et al.* What determines Self-Rated Health (SRH)? A  
7 cross-sectional study of SF-36 health domains in the EPIC-Norfolk cohort. *J Epidemiol*  
8 *Community Heal* 2011;**65**:800–6. doi:10.1136/jech.2009.090845  
9  
10  
11  
12 51 Kyffin RGE, Goldacre MJ, Gill M. Mortality rates and self reported health: database analysis by  
13 English local authority area. *BMJ* 2004;**329**:887–8. doi:10.1136/bmj.38238.508021.F7  
14  
15  
16  
17 52 Ware JE. SF-36 health survey update. *Spine (Phila Pa 1976)* 2000;**25**:3130–  
18 9.<http://www.ncbi.nlm.nih.gov/pubmed/11124729>  
19  
20  
21  
22 53 Domínguez-Berjón MF, Borrell C, Cano-Serral G, *et al.* [Constructing a deprivation index based  
23 on census data in large Spanish cities(the MEDEA project)]. *Gac Sanit* 2008;**22**:179–  
24 87.<http://www.ncbi.nlm.nih.gov/pubmed/18579042>  
25  
26  
27  
28 54 Statistics Netherlands. CBS - Kerncijfers wijken en buurten 2004-2013. Cent. Bur. voor Stat. Den  
29 Haag/Heerlen. 2013.[http://www.cbs.nl/nl-NL/menu/themas/dossiers/nederland-](http://www.cbs.nl/nl-NL/menu/themas/dossiers/nederland-regionaal/cijfers/incidenteel/maatwerk/wijk-buurtstatistieken/kwb-recent/default.htm)  
30 [regionaal/cijfers/incidenteel/maatwerk/wijk-buurtstatistieken/kwb-recent/default.htm](http://www.cbs.nl/nl-NL/menu/themas/dossiers/nederland-regionaal/cijfers/incidenteel/maatwerk/wijk-buurtstatistieken/kwb-recent/default.htm)  
31  
32  
33  
34  
35 55 Statistics Lithuania. Population and Housing Census of the Republic of Lithuania, 2011. Vilnius:  
36 2013. [https://osp.stat.gov.lt/documents/.../Report2011\\_Population\\_and\\_Housing\\_Census](https://osp.stat.gov.lt/documents/.../Report2011_Population_and_Housing_Census)  
37  
38  
39  
40 56 Department for Communities and Local Government. English Indices of Deprivation 2010.  
41 2010.[https://www.gov.uk/government/uploads/system/uploads/attachment\\_data/file/6872/187152](https://www.gov.uk/government/uploads/system/uploads/attachment_data/file/6872/187152)  
42 4.xls  
43  
44  
45  
46 57 Benjamini Y, Hochberg Y. Controlling the False Discovery Rate: A Practical and Powerful  
47 Approach to Multiple Testing. *J. R. Stat. Soc. Ser. B.* 1995;**57**:289–300. doi:10.2307/2346101  
48  
49  
50  
51 58 StataCorp. Stata Statistical Software: Release 14. 2015.  
52  
53  
54 59 Wood L, Giles-Corti B, Bulsara M. The pet connection: pets as a conduit for social capital? *Soc*  
55 *Sci Med* 2005;**61**:1159–73. doi:10.1016/j.socscimed.2005.01.017  
56  
57  
58 60 Wood L, Martin K, Christian H, *et al.* Social capital and pet ownership – A tale of four cities.  
59 *SSM - Popul Heal* 2017;**3**:442–7. doi:10.1016/j.ssmph.2017.05.002  
60

- 1  
2  
3 61 Dalton AM, Wareham N, Griffin S, *et al.* Neighbourhood greenspace is associated with a slower  
4 decline in physical activity in older adults: A prospective cohort study. *SSM - Popul Heal*  
5 2016;2:683–91. doi:10.1016/j.ssmph.2016.09.006  
6  
7  
8  
9 62 Root ED, Silbernagel K, Litt JS. Unpacking healthy landscapes: Empirical assessment of  
10 neighborhood aesthetic ratings in an urban setting. *Landsc Urban Plan* 2017;168:38–47.  
11 doi:10.1016/J.LANDURBPLAN.2017.09.028  
12  
13  
14  
15  
16  
17  
18  
19  
20  
21  
22  
23  
24  
25  
26  
27  
28  
29  
30  
31  
32  
33  
34  
35  
36  
37  
38  
39  
40  
41  
42  
43  
44  
45  
46  
47  
48  
49  
50  
51  
52  
53  
54  
55  
56  
57  
58  
59  
60

For peer review only



Tables.

Table 1. Population characteristics by dog-ownership

|                                                        | Total<br>n=3586 | Non-dog-<br>owner<br>n=2478 | Dog owner<br>n=1108 | adjusted<br>p-value* |
|--------------------------------------------------------|-----------------|-----------------------------|---------------------|----------------------|
| Age, mean (SD)                                         | 51.4 (15.9)     | 51.3 (15.9)                 | 51.7 (16.0)         | >.05                 |
| Sex, n (females %)                                     | 1967 (54.9)     | 1314 (53.0)                 | 653 (58.9)          | <.05                 |
| Household composition, n (%)                           |                 |                             |                     | <.05                 |
| <i>alone</i>                                           | 614 (17.1)      | 461 (18.6)                  | 153 (13.8)          |                      |
| <i>with partner (without children)</i>                 | 1239 (34.5)     | 864 (34.9)                  | 375 (33.8)          |                      |
| <i>with children &lt;12 yr old</i>                     | 535 (14.9)      | 383 (15.5)                  | 152 (13.7)          |                      |
| <i>with children &gt;12 yr old</i>                     | 602 (16.8)      | 368 (14.9)                  | 234 (21.1)          |                      |
| <i>other</i>                                           | 597 (16.6)      | 402 (16.2)                  | 195 (17.6)          |                      |
| City, n (%)                                            |                 |                             |                     | <.05                 |
| <i>Barcelona</i>                                       | 979 (27.3)      | 790 (31.9)                  | 189 (17.1)          |                      |
| <i>Doetinchem</i>                                      | 851 (23.7)      | 668 (27.0)                  | 183 (16.5)          |                      |
| <i>Kaunas</i>                                          | 892 (24.9)      | 436 (17.6)                  | 456 (41.1)          |                      |
| <i>Stoke-on-Trent</i>                                  | 864 (24.1)      | 584 (23.6)                  | 280 (25.3)          |                      |
| Education, n (%)                                       |                 |                             |                     | >.05                 |
| <i>low</i>                                             | 251 (7.0)       | 163 (6.6)                   | 88 (7.9)            |                      |
| <i>medium</i>                                          | 1568 (43.7)     | 1087 (43.9)                 | 481 (43.5)          |                      |
| <i>high</i>                                            | 1767 (49.3)     | 1228 (49.6)                 | 539 (48.6)          |                      |
| Perceived income situation, n (%)                      |                 |                             |                     | <.05                 |
| <i>cannot make ends meet</i>                           | 385 (10.7)      | 276 (11.1)                  | 109 (9.8)           |                      |
| <i>enough to get by</i>                                | 1800 (50.2)     | 1165 (47.0)                 | 635 (57.3)          |                      |
| <i>comfortable</i>                                     | 1401 (39.1)     | 1037 (41.9)                 | 364 (32.9)          |                      |
| Weight status (BMI categories), n (%)                  |                 |                             |                     | <.05                 |
| <i>healthy weight</i>                                  | 1610 (44.9)     | 1165 (47.0)                 | 445 (40.2)          |                      |
| <i>overweight</i>                                      | 1192 (33.2)     | 819 (33.1)                  | 373 (33.6)          |                      |
| <i>obese</i>                                           | 784 (21.9)      | 494 (19.9)                  | 290 (26.2)          |                      |
| Physical constraint restricting mobility, n (%)        | 1003 (25.4)     | 536 (19.9)                  | 467 (37.3)          | <.05                 |
| One or more chronic diseases, n (%)                    | 1313 (36.6)     | 860 (34.7)                  | 453 (40.9)          | <.05                 |
| Minutes/week walking (leisure), median (IQR)           | 120 (300)       | 90 (240)                    | 180 (420)           | <.05                 |
| Smoking, n (%)                                         |                 |                             |                     | <.05                 |
| <i>current</i>                                         | 733 (20.5)      | 478 (19.3)                  | 255 (23.0)          |                      |
| <i>former</i>                                          | 1008 (28.1)     | 724 (29.2)                  | 284 (25.6)          |                      |
| <i>never</i>                                           | 1843 (51.4)     | 1275 (51.5)                 | 568 (51.3)          |                      |
| Frequency of contact with family and/or friends, n (%) |                 |                             |                     | >.05                 |
| <i>(almost) daily</i>                                  | 2135 (59.5)     | 1470 (59.3)                 | 665 (60.0)          |                      |
| <i>≥1 per week</i>                                     | 1114 (31.1)     | 781 (31.1)                  | 333 (30.0)          |                      |
| <i>1-3 per month or less</i>                           | 392 (9.4)       | 227 (9.2)                   | 111 (10.0)          |                      |
| Feeling part of a group of friends, n %                |                 |                             |                     | <.05                 |
| <i>(totally) agree</i>                                 | 2414 (67.5)     | 1754 (70.9)                 | 660 (59.7)          |                      |
| <i>neutral, (totally) disagree</i>                     | 1165 (32.5)     | 719 (29.1)                  | 446 (40.3)          |                      |
| Perceived safety of NOE in NBH, n (%)                  |                 |                             |                     | <.05                 |
| <i>(very) satisfied</i>                                | 2123 (59.2)     | 1486 (60.0)                 | 637 (57.5)          |                      |
| <i>neutral</i>                                         | 776 (21.6)      | 542 (21.9)                  | 234 (21.1)          |                      |
| <i>(very) dissatisfied</i>                             | 687 (19.2)      | 450 (18.2)                  | 237 (21.4)          |                      |
| NBH SES, n (%)                                         |                 |                             |                     | >.05                 |
| <i>low</i>                                             | 1131 (31.5)     | 791 (31.9)                  | 340 (30.7)          |                      |

|                                                                              |                      |                      |                      |      |
|------------------------------------------------------------------------------|----------------------|----------------------|----------------------|------|
| <i>medium</i>                                                                | 1379 (38.4)          | 938 (37.9)           | 441 (39.8)           |      |
| <i>high</i>                                                                  | 1076 (30.0)          | 749 (30.2)           | 327 (29.5)           |      |
| Minutes/week walking (leisure),<br>median (IQR)                              | 120 (300)            | 90 (240)             | 180 (420)            | <.05 |
| Hours spent in NOE near home<br>in last 4 wks, median (IQR)                  | 4 (11.8)             | 3.75 (10)            | 10 (29.3)            | <.05 |
| General health, n (%)                                                        |                      |                      |                      | <.05 |
| <i>Excellent</i> , (very) good                                               | 2662 (74.2)          | 1939 (78.3)          | 723 (65.2)           |      |
| <i>(Very) Bad</i>                                                            | 924 (25.8)           | 539 (21.8)           | 385 (34.8)           |      |
| Mental health (SF-36), mean<br>(SD)                                          | 73.5 (16.3)          | 73.9 (16.2)          | 72.5 (16.3)          | <.05 |
| Distance to nearest NOE (m),<br>median (IQR)                                 | 161.0 (214)          | 155.7 (205.6)        | 172.4 (232.4)        | <.05 |
| Number of NOE in 300m NWB,<br>median (IQR)                                   | 1 (1)                | 1 (2)                | 1 (2)                | <.05 |
| Number of NOE in 500m NWB,<br>median (IQR)                                   | 1 (1)                | 3 (3)                | 3 (3)                | <.05 |
| Number of NOE in 1000m NWB,<br>median (IQR)                                  | 10 (10)              | 11 (10)              | 8 (10)               | <.05 |
| Area of NOE in 300m NWB<br>(m <sup>2</sup> ), median (IQR)                   | 38,013<br>(136,092)  | 36,007<br>(132,239)  | 41,241<br>(154,377)  | >.05 |
| Area of NOE in 500m NWB<br>(m <sup>2</sup> ), median (IQR)                   | 140,281<br>(286,917) | 137,862<br>(261,453) | 150,758<br>(402,966) | <.05 |
| Area of NOE in 1000m NWB<br>(m <sup>2</sup> ), median (IQR)                  | 588,516<br>(975,551) | 557,191<br>(890,303) | 720,366<br>(239,293) | <.05 |
| Distance to nearest NOE (m),<br>median (IQR)                                 | 161.0 (214)          | 155.7 (205.6)        | 172.4 (232.4)        | <.05 |
| Average residential surrounding<br>greenness in 100m buffer,<br>median (IQR) | 0.46 (0.16)          | 0.44 (0.28)          | 0.50 (0.16)          | <.05 |
| Average residential surrounding<br>greenness in 300m buffer,<br>median (IQR) | 0.49 (0.23)          | 0.47 (0.30)          | 0.51 (0.13)          | <.05 |
| Average residential surrounding<br>greenness in 500m buffer,<br>median (IQR) | 0.49 (0.23)          | 0.48 (0.31)          | 0.51 (0.11)          | <.05 |

NOE= natural outdoor environments; NBH= neighborhood; NWB= network buffer; IQR= interquartile range; SD= standard deviation; BMI= body mass index; SES= socioeconomic status. \* based on t-tests, Chi-square, Kruskal-Wallis, and rank-sum tests and with p-values adjusted for the false discovery rate with the Benjamini-Hochberg Procedure.

Table 2. Associations between dog-ownership, leisure time walking, time spent in NOE near the home, general health status and mental health.

|                         | Leisure time walking (min/wk) | Time spent in NOE near home (h/wk) | General health, excellent, (very) good (reference: fair, poor) | Mental health (scale 0-100, higher is better) |
|-------------------------|-------------------------------|------------------------------------|----------------------------------------------------------------|-----------------------------------------------|
| Dog ownership (vs. not) | IRR (95% CI)                  | IRR (95% CI)                       | OR (95% CI)                                                    | $\beta$ (95% CI)                              |
| Total                   | 1.65 (1.65; 1.66) n=3586      | 1.48 (1.45; 1.51) n=3530           | 0.92 (0.73; 1.15) n=3586                                       | 0.24 (-0.89; 1.37) n=3584                     |
| Barcelona               | 1.07 (1.06; 1.08) n=979       | 1.70 (1.62; 1.78) n=978            | 1.90 (1.01; 3.56) n=979                                        | 0.13 (-2.29; 2.55) n=979                      |
| Doetinchem              | 3.67 (3.63; 3.70) n=851       | 1.38 (1.32; 1.45) n=846            | 0.89 (0.37; 2.17) n=851                                        | 1.61 (-0.55; 3.78) n=849                      |
| Kaunas                  | 1.10 (1.09; 1.11) n=892       | 1.19 (1.16; 1.23) n=844            | 0.71 (0.50; 1.00) n=892                                        | -2.17 (-4.40; 0.06) n=892                     |
| Stoke-on-Trent          | 1.83 (1.81; 1.85) n=864       | 2.20 (2.11; 2.29) n=862            | 0.89 (0.57; 1.37) n=864                                        | 2.61 (0.35; 4.86) n=864                       |

NOE= natural outdoor environments; IRR= incidence rate ratio; OR= odds ratio; CI= confidence interval

*Analytical method: mixed models with random intercept for neighborhoods and adjusted for age, sex, education, neighborhood SES, household composition, perceived income situation, perceived NOE safety, physical constraint restricting mobility, and chronic diseases. Analyses were based on complete cases.*

Table 3. Associations between dog-ownership, walking, time in NOE, perceived general and mental health status by access to NOE and residential surrounding greenness.

|                                          |         | Leisure time walking (min/wk) | Time spent in NOE near home (h/wk) | General health, excellent, (very) good (reference: fair, poor) | Mental health (scale 0-100, higher is better) |
|------------------------------------------|---------|-------------------------------|------------------------------------|----------------------------------------------------------------|-----------------------------------------------|
| Dog ownership (vs. not)                  |         | IRR (95% CI)                  | IRR (95% CI)                       | OR (95% CI)                                                    | $\beta$ (95% CI)                              |
| Number of NOE (500m)                     | lowest  | 1.61 (1.60; 1.62)<br>n=2084   | 1.43 (1.39; 1.47)<br>n=2051        | 0.89 (0.65; 1.22)<br>n=2084                                    | 0.55 (-0.93; 2.03)<br>n=2082                  |
|                                          | highest | 1.72 (1.71; 1.73)<br>n=1502   | 1.51 (1.46; 1.56)<br>n=1479        | 0.90 (0.62; 1.29)<br>n=1502                                    | -0.62 (-2.36; 1.13)<br>n=1502                 |
| Area of NOE (500m)                       | lowest  | 1.76 (1.75; 1.77)<br>n=1779   | 1.35 (1.30; 1.39)<br>n=1753        | 0.90 (0.64; 1.27)<br>n=1779                                    | 0.85 (-0.83; 2.53)<br>n=1777                  |
|                                          | highest | 1.61 (1.60; 1.62)<br>n=1807   | 1.60 (1.56; 1.65)<br>n=1777        | 0.81 (0.59; 1.12)<br>n=1807                                    | -0.48 (-1.20; 1.04)<br>n=1807                 |
| Distance to nearest NOE                  | ≤300m   | 1.73 (1.72; 1.74)<br>n=2778   | 1.52 (1.49; 1.56)<br>n=2746        | 0.91 (0.69; 1.20)<br>n=2778                                    | 0.66 (-0.61; 1.93)<br>n=2776                  |
|                                          | >300m   | 1.46 (1.44; 1.47)<br>n=808    | 1.21 (1.16; 1.27)<br>n=784         | 0.70 (0.46; 1.05)<br>n=808                                     | -1.05 (-3.45; 1.36)<br>n=808                  |
| Residential surrounding greenness (500m) | lowest  | 1.55 (1.54; 1.56)<br>n=1786   | 1.37 (1.33; 1.42)<br>n=1765        | 0.86 (0.61; 1.21)<br>n=1786                                    | 0.38 (-1.29; 2.05)<br>n=1785                  |
|                                          | highest | 1.76 (1.74; 1.77)<br>n=1800   | 1.61 (1.56; 1.65)<br>n=1765        | 0.95 (0.68; 1.33)<br>n=1800                                    | -0.16 (-1.69; 1.36)<br>n=1799                 |

NOE= natural outdoor environments; IRR= incidence rate ratio; OR= odds ratio; CI= confidence interval. Analytical method: mixed models with random intercept for neighborhoods and adjusted for age, sex, education, neighborhood SES, household composition, perceived income situation, perceived NOE safety, physical constraint restricting mobility, and chronic diseases. Analyses were based on complete cases.

1  
2  
3  
4  
5  
6  
7  
8  
9  
10  
11  
12  
13  
14  
15  
16  
17  
18  
19  
20  
21  
22  
23  
24  
25  
26  
27  
28  
29  
30  
31  
32  
33  
34  
35  
36  
37  
38  
39  
40  
41  
42  
43  
44  
45  
46  
47  
48  
49  
50  
51  
52  
53  
54  
55  
56  
57  
58  
59  
60

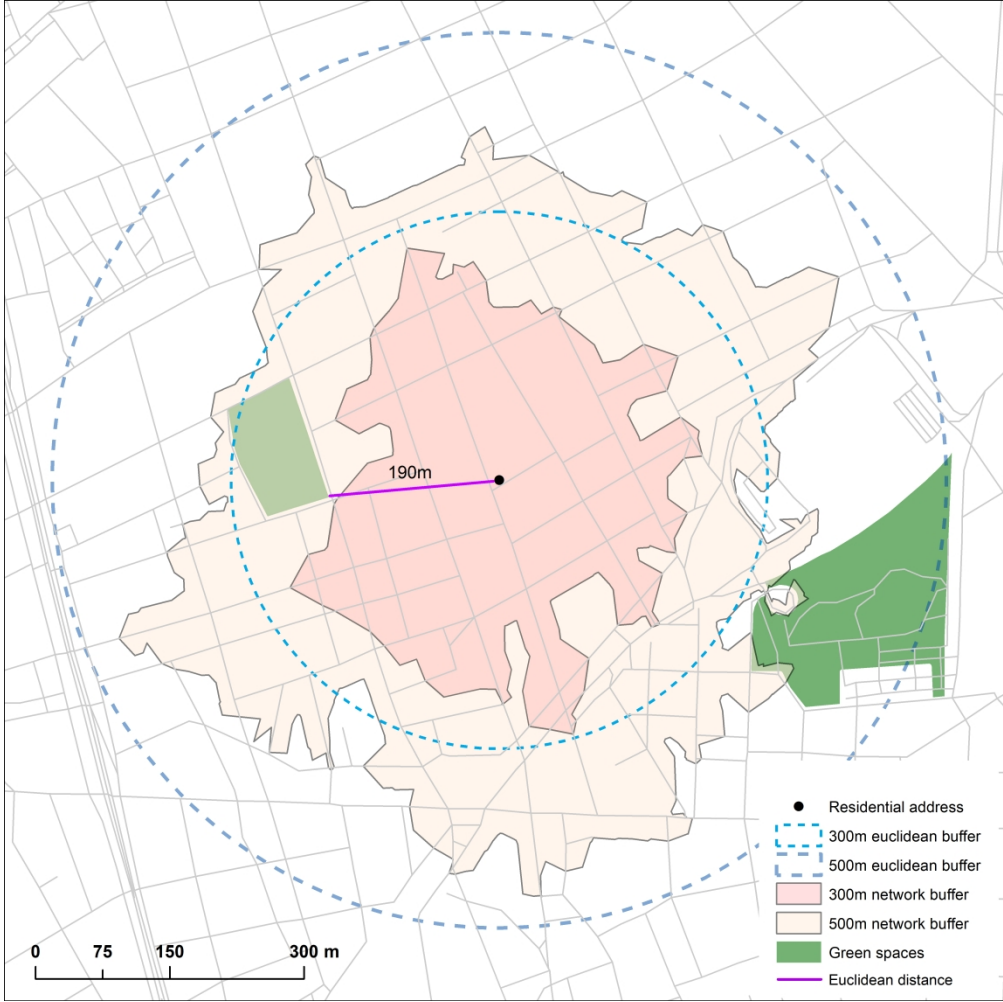

Figure 1. Example of different buffer types and the distance to natural outdoor environments from a residential address.

Supplemental Material Zijlema et al - Dog ownership, the natural outdoor environment and health: a cross-sectional study

Supplemental Table S1. Full model results of associations between dog-ownership, leisure time walking, time spent in NOE near the home, general health status and mental health.

|                                                        | Leisure time walking (min/wk) | Time spent in NOE near home (h/wk) | General health, excellent, (very) good (reference: fair, poor) | Mental health (scale 0-100, higher is better) |
|--------------------------------------------------------|-------------------------------|------------------------------------|----------------------------------------------------------------|-----------------------------------------------|
|                                                        | IRR (95% CI)                  | IRR (95% CI)                       | OR (95% CI)                                                    | $\beta$ (95% CI)                              |
| Dog ownership (vs. not)                                | 1.65 (1.65; 1.66)             | 1.48 (1.45; 1.51)                  | 0.92 (0.73; 1.15)                                              | 0.24 (-0.89; 1.37)                            |
| Female sex                                             | 1.09 (1.08; 1.09)             | 0.89 (1.45; 1.51)                  | 1.12 (0.91; 1.38)                                              | -2.07 (-3.08; -1.07)                          |
| Age                                                    | 1.00 (1.00; 1.00)             | 1.01 (1.01; 1.01)                  | 0.97 (0.96; 0.98)                                              | 0.07 (0.03; 0.11)                             |
| Household composition (vs. alone)                      |                               |                                    |                                                                |                                               |
| <i>with partner (without children)</i>                 | 0.97 (0.96; 0.97)             | 1.10 (1.07; 1.13)                  | 1.01 (0.75; 1.37)                                              | 1.36 (-0.13; 2.85)                            |
| <i>with children &lt;12 yr old</i>                     | 0.90 (0.89; 0.91)             | 1.29 (1.24; 1.33)                  | 0.88 (0.57; 1.36)                                              | 2.86 (0.95; 4.76)                             |
| <i>with children &gt;12 yr old</i>                     | 0.94 (0.93; 0.94)             | 1.17 (1.13; 1.21)                  | 1.00 (0.70; 1.45)                                              | 1.77 (0.05; 3.49)                             |
| <i>other</i>                                           | 0.93 (0.92; 0.94)             | 1.02 (0.98; 1.06)                  | 0.57 (0.39; 0.85)                                              | 1.16 (-0.75; 3.07)                            |
| Education (vs. low)                                    |                               |                                    |                                                                |                                               |
| <i>medium</i>                                          | 0.96 (0.81; 1.13)             | 1.33 (1.27; 1.40)                  | 0.99 (0.65; 1.49)                                              | 3.70 (1.55; 5.84)                             |
| <i>high</i>                                            | 1.04 (0.88; 1.23)             | 1.56 (1.48; 1.63)                  | 1.26 (0.81; 1.97)                                              | 4.91 (2.69; 7.12)                             |
| Perceived income situation (vs. cannot make ends meet) |                               |                                    |                                                                |                                               |
| <i>enough to get by</i>                                | 0.99 (0.98; 1.00)             | 0.98 (0.94; 1.01)                  | 1.67 (1.19; 2.35)                                              | 2.92 (1.22; 4.63)                             |
| <i>comfortable</i>                                     | 1.05 (1.05; 1.06)             | 1.00 (0.96; 1.03)                  | 5.00 (3.40; 7.36)                                              | 8.06 (6.26; 9.86)                             |
| Physical constraint restricting mobility (vs. not)     | 0.99 (0.99; 1.00)             | 0.89 (0.87; 0.91)                  | 0.48 (0.39; 0.61)                                              | -0.86 (-2.14; 0.41)                           |
| One or more chronic diseases (vs. not)                 | 1.03 (1.03; 1.04)             | 1.02 (1.00; 1.04)                  | 0.18 (0.14; 0.22)                                              | -4.16 (-5.34; -2.98)                          |
| Perceived safety of NOE in NBH (vs. very satisfied)    |                               |                                    |                                                                |                                               |
| <i>satisfied</i>                                       | 1.05 (1.04; 1.06)             | 0.90 (0.87; 0.93)                  | 1.01 (0.66; 1.56)                                              | -2.47 (-4.33; -0.61)                          |
| <i>neutral</i>                                         | 0.96 (0.95; 0.97)             | 0.85 (0.81; 0.88)                  | 0.72 (0.46; 1.15)                                              | -4.65 (-6.70; -2.61)                          |
| <i>dissatisfied</i>                                    | 1.09 (1.08; 1.10)             | 0.85 (0.82; 0.89)                  | 0.61 (0.38; 0.97)                                              | -5.45 (-7.62; -3.28)                          |
| <i>very dissatisfied</i>                               | 1.15 (1.14; 1.17)             | 1.37 (1.30; 1.45)                  | 0.70 (0.36; 1.37)                                              | -6.01 (-9.28; -2.73)                          |
| NBH SES (vs. low)                                      |                               |                                    |                                                                |                                               |
| <i>medium</i>                                          | 0.96 (0.81; 1.13)             | 1.02 (0.79; 1.30)                  | 0.92 (0.45; 1.88)                                              | -0.49 (-2.63; 1.64)                           |
| <i>high</i>                                            | 1.04 (0.88; 1.23)             | 0.96 (0.75; 1.23)                  | 0.96 (0.46; 1.99)                                              | 0.89 (-1.33; 3.10)                            |

NOE= natural outdoor environments; IRR= incidence rate ratio; OR= odds ratio; CI= confidence interval; NBH= neighborhood; SES= socioeconomic status. Analytical method: mixed models with random intercept for neighborhoods and adjusted for age, sex, education, neighborhood SES, household composition, perceived income situation, perceived NOE safety, physical constraint restricting mobility, and chronic diseases. Analyses were based on complete cases.

## Supplemental Material Zijlema et al - Dog ownership, the natural outdoor environment and health: a cross-sectional study

Supplemental Table S2. Associations between dog-ownership, walking, time in NOE, perceived general and mental health status by access to NOE and residential surrounding greenness

| Dog ownership (vs. not)      | Leisure time walking (min/wk) | Time spent in NOE near home (h/wk) | General health, excellent, (very) good (reference: fair, poor) | Mental health (scale 0-100, higher is better) |                               |
|------------------------------|-------------------------------|------------------------------------|----------------------------------------------------------------|-----------------------------------------------|-------------------------------|
|                              | IRR (95% CI)                  | IRR (95% CI)                       | OR (95% CI)                                                    | $\beta$ (95% CI)                              |                               |
| Number of NOE                | 300m                          |                                    |                                                                |                                               |                               |
|                              | lowest                        | 1.67 (1.66; 1.68)<br>n=2414        | 1.41 (1.37; 1.44)<br>n=2368                                    | 0.87 (0.66; 1.15)<br>n=2414                   | 0.37 (-0.99; 1.73)<br>n=2412  |
|                              | highest                       | 1.62 (1.60; 1.63)<br>n=1172        | 1.63 (1.57; 1.69)<br>n=1162                                    | 0.84 (0.54; 1.29)<br>n=1172                   | 0.38 (-1.62; 2.39)<br>n=1172  |
|                              | 1000m                         |                                    |                                                                |                                               |                               |
|                              | lowest                        | 1.56 (1.55; 1.57)<br>n=1869        | 1.38 (1.34; 1.42)<br>n=1843                                    | 0.85 (0.61; 1.18)<br>n=1869                   | -0.72 (-2.24; 0.81)<br>n=1867 |
|                              | highest                       | 1.75 (1.73; 1.76)<br>n=1717        | 1.68 (1.63; 1.73)<br>n=1687                                    | 0.87 (0.63; 1.22)<br>n=1717                   | 0.68 (-0.98; 2.34)<br>n=1717  |
| Area of NOE                  | 300m                          |                                    |                                                                |                                               |                               |
|                              | lowest                        | 1.76 (1.75; 1.78)<br>n=1832        | 1.37 (1.33; 1.41)<br>n=1801                                    | 0.78 (0.56; 1.08)<br>n=1832                   | -0.30 (-1.90; 1.30)<br>n=1830 |
|                              | highest                       | 1.53 (1.52; 1.54)<br>n=1754        | 1.53 (1.49; 1.58)<br>n=1729                                    | 0.92 (0.65; 1.28)<br>n=1754                   | 0.61 (-0.97; 2.20)<br>n=1754  |
|                              | 1000m                         |                                    |                                                                |                                               |                               |
|                              | lowest                        | 1.54 (1.53; 1.55)<br>n=1799        | 1.26 (1.22; 1.30)<br>n=1777                                    | 0.74 (0.53; 1.03)<br>n=1799                   | -0.80 (-2.46; 0.87)<br>n=1797 |
|                              | highest                       | 1.72 (1.70; 1.73)<br>n=1787        | 1.66 (1.62; 1.71)<br>n=1753                                    | 0.94 (0.67; 1.30)<br>n=1787                   | 0.65 (-0.88; 2.18)<br>n=1787  |
| Surrounding greenness (NDVI) | 100m                          |                                    |                                                                |                                               |                               |
|                              | lowest                        | 1.54 (1.53; 1.55)<br>n=1797        | 1.48 (1.43; 1.53)<br>n=1769                                    | 0.74 (0.53; 1.03)<br>n=1797                   | 0.23 (-1.42; 1.89)<br>n=1796  |
|                              | highest                       | 1.83 (1.81; 1.84)<br>n=1789        | 1.46 (1.42; 1.50)<br>n=1761                                    | 0.95 (0.68; 1.33)<br>n=1789                   | -0.06 (-1.59; 1.47)<br>n=1788 |
|                              | 300m                          |                                    |                                                                |                                               |                               |
|                              | lowest                        | 1.55 (1.53; 1.56)<br>n=1786        | 1.48 (1.43; 1.53)<br>n=1757                                    | 0.77 (0.54; 1.09)<br>n=1786                   | 0.43 (-1.25; 2.10)<br>n=1785  |
|                              | highest                       | 1.81 (1.80; 1.82)<br>n=1800        | 1.56 (1.51; 1.60)<br>n=1773                                    | 0.98 (0.71; 1.36)<br>n=1800                   | -0.11 (-1.62; 1.41)<br>n=1799 |

NOE= natural outdoor environments; IRR= incidence rate ratio; OR= odds ratio; CI= confidence interval; NDVI= normalized difference vegetation index. Analytical method: mixed models with random intercept for neighborhoods and adjusted for age, sex, education, neighborhood SES, household composition, perceived income situation, perceived NOE safety, physical constraint restricting mobility, and chronic diseases. Analyses were based on complete cases.

## STROBE Statement—checklist of items that should be included in reports of observational studies

|                              | Item No | Recommendation                                                                                                                                                                                                                                                                                                                                                                                                                                                         | Appears in manuscript on page |
|------------------------------|---------|------------------------------------------------------------------------------------------------------------------------------------------------------------------------------------------------------------------------------------------------------------------------------------------------------------------------------------------------------------------------------------------------------------------------------------------------------------------------|-------------------------------|
| <b>Title and abstract</b>    | 1       | (a) Indicate the study's design with a commonly used term in the title or the abstract                                                                                                                                                                                                                                                                                                                                                                                 | 1, 3                          |
|                              |         | (b) Provide in the abstract an informative and balanced summary of what was done and what was found                                                                                                                                                                                                                                                                                                                                                                    | 3,4                           |
| <b>Introduction</b>          |         |                                                                                                                                                                                                                                                                                                                                                                                                                                                                        |                               |
| Background/rationale         | 2       | Explain the scientific background and rationale for the investigation being reported                                                                                                                                                                                                                                                                                                                                                                                   | 6                             |
| Objectives                   | 3       | State specific objectives, including any prespecified hypotheses                                                                                                                                                                                                                                                                                                                                                                                                       | 6                             |
| <b>Methods</b>               |         |                                                                                                                                                                                                                                                                                                                                                                                                                                                                        |                               |
| Study design                 | 4       | Present key elements of study design early in the paper                                                                                                                                                                                                                                                                                                                                                                                                                | 7                             |
| Setting                      | 5       | Describe the setting, locations, and relevant dates, including periods of recruitment, exposure, follow-up, and data collection                                                                                                                                                                                                                                                                                                                                        | 7-10                          |
| Participants                 | 6       | (a) <i>Cohort study</i> —Give the eligibility criteria, and the sources and methods of selection of participants. Describe methods of follow-up<br><i>Case-control study</i> —Give the eligibility criteria, and the sources and methods of case ascertainment and control selection. Give the rationale for the choice of cases and controls<br><i>Cross-sectional study</i> —Give the eligibility criteria, and the sources and methods of selection of participants | 7                             |
|                              |         | (b) <i>Cohort study</i> —For matched studies, give matching criteria and number of exposed and unexposed<br><i>Case-control study</i> —For matched studies, give matching criteria and the number of controls per case                                                                                                                                                                                                                                                 | n.a.                          |
| Variables                    | 7       | Clearly define all outcomes, exposures, predictors, potential confounders, and effect modifiers. Give diagnostic criteria, if applicable                                                                                                                                                                                                                                                                                                                               | 7-10                          |
| Data sources/<br>measurement | 8*      | For each variable of interest, give sources of data and details of methods of assessment (measurement). Describe comparability of assessment methods if there is more than one group                                                                                                                                                                                                                                                                                   | 7-10                          |
| Bias                         | 9       | Describe any efforts to address potential sources of bias                                                                                                                                                                                                                                                                                                                                                                                                              | 7-11                          |
| Study size                   | 10      | Explain how the study size was arrived at                                                                                                                                                                                                                                                                                                                                                                                                                              | 7                             |
| Quantitative variables       | 11      | Explain how quantitative variables were handled in the analyses. If applicable, describe which groupings were chosen and why                                                                                                                                                                                                                                                                                                                                           | 7-10                          |
| Statistical methods          | 12      | (a) Describe all statistical methods, including those used to control for confounding                                                                                                                                                                                                                                                                                                                                                                                  | 10-11                         |
|                              |         | (b) Describe any methods used to examine subgroups and interactions                                                                                                                                                                                                                                                                                                                                                                                                    | 10-11                         |
|                              |         | (c) Explain how missing data were addressed                                                                                                                                                                                                                                                                                                                                                                                                                            | 10                            |
|                              |         | (d) <i>Cohort study</i> —If applicable, explain how loss to follow-up was addressed<br><i>Case-control study</i> —If applicable, explain how matching of                                                                                                                                                                                                                                                                                                               | 10-11                         |



|                          |     |                                                                                                                                                                                                              |                                      |
|--------------------------|-----|--------------------------------------------------------------------------------------------------------------------------------------------------------------------------------------------------------------|--------------------------------------|
|                          |     | cases and controls was addressed                                                                                                                                                                             |                                      |
|                          |     | <i>Cross-sectional study</i> —If applicable, describe analytical methods taking account of sampling strategy                                                                                                 |                                      |
|                          |     | (e) Describe any sensitivity analyses                                                                                                                                                                        | 10-11                                |
| <b>Results</b>           |     |                                                                                                                                                                                                              | <b>Appears in manuscript on page</b> |
| Participants             | 13* | (a) Report numbers of individuals at each stage of study—eg numbers potentially eligible, examined for eligibility, confirmed eligible, included in the study, completing follow-up, and analysed            | -                                    |
|                          |     | (b) Give reasons for non-participation at each stage                                                                                                                                                         | -                                    |
|                          |     | (c) Consider use of a flow diagram                                                                                                                                                                           | -                                    |
| Descriptive data         | 14* | (a) Give characteristics of study participants (eg demographic, clinical, social) and information on exposures and potential confounders                                                                     | 11                                   |
|                          |     | (b) Indicate number of participants with missing data for each variable of interest                                                                                                                          | -                                    |
|                          |     | (c) <i>Cohort study</i> —Summarise follow-up time (eg, average and total amount)                                                                                                                             | n.a.                                 |
| Outcome data             | 15* | <i>Cohort study</i> —Report numbers of outcome events or summary measures over time                                                                                                                          | n.a.                                 |
|                          |     | <i>Case-control study</i> —Report numbers in each exposure category, or summary measures of exposure                                                                                                         | n.a.                                 |
|                          |     | <i>Cross-sectional study</i> —Report numbers of outcome events or summary measures                                                                                                                           | Table 1                              |
| Main results             | 16  | (a) Give unadjusted estimates and, if applicable, confounder-adjusted estimates and their precision (eg, 95% confidence interval). Make clear which confounders were adjusted for and why they were included | Tables, 11-12                        |
|                          |     | (b) Report category boundaries when continuous variables were categorized                                                                                                                                    | Tables, 7-10                         |
|                          |     | (c) If relevant, consider translating estimates of relative risk into absolute risk for a meaningful time period                                                                                             | n.a.                                 |
| Other analyses           | 17  | Report other analyses done—eg analyses of subgroups and interactions, and sensitivity analyses                                                                                                               | Tables, 12-13                        |
| <b>Discussion</b>        |     |                                                                                                                                                                                                              |                                      |
| Key results              | 18  | Summarise key results with reference to study objectives                                                                                                                                                     | 13                                   |
| Limitations              | 19  | Discuss limitations of the study, taking into account sources of potential bias or imprecision. Discuss both direction and magnitude of any potential bias                                                   | 14                                   |
| Interpretation           | 20  | Give a cautious overall interpretation of results considering objectives, limitations, multiplicity of analyses, results from similar studies, and other relevant evidence                                   | 13-14                                |
| Generalisability         | 21  | Discuss the generalisability (external validity) of the study results                                                                                                                                        | 13-14                                |
| <b>Other information</b> |     |                                                                                                                                                                                                              |                                      |
| Funding                  | 22  | Give the source of funding and the role of the funders for the present study and, if applicable, for the original study on which the present article is based                                                | 4-5                                  |

1  
2  
3 \*Give information separately for cases and controls in case-control studies and, if applicable, for exposed and  
4 unexposed groups in cohort and cross-sectional studies.  
5

6 **Note:** An Explanation and Elaboration article discusses each checklist item and gives methodological background and  
7 published examples of transparent reporting. The STROBE checklist is best used in conjunction with this article (freely  
8 available on the Web sites of PLoS Medicine at <http://www.plosmedicine.org/>, Annals of Internal Medicine at  
9 <http://www.annals.org/>, and Epidemiology at <http://www.epidem.com/>). Information on the STROBE Initiative is  
10 available at [www.strobe-statement.org](http://www.strobe-statement.org).  
11  
12  
13  
14  
15  
16  
17  
18  
19  
20  
21  
22  
23  
24  
25  
26  
27  
28  
29  
30  
31  
32  
33  
34  
35  
36  
37  
38  
39  
40  
41  
42  
43  
44  
45  
46  
47  
48  
49  
50  
51  
52  
53  
54  
55  
56  
57  
58  
59  
60

# BMJ Open

## Dog ownership, the natural outdoor environment and health: a cross-sectional study

|                                 |                                                                                                                                                                                                                                                                                                                                                                                                                                                                                                                                                                                                                                                                                                                                                                                                                                                                                                                                                                                                                                                                                                                                                                                                                                                                                                         |
|---------------------------------|---------------------------------------------------------------------------------------------------------------------------------------------------------------------------------------------------------------------------------------------------------------------------------------------------------------------------------------------------------------------------------------------------------------------------------------------------------------------------------------------------------------------------------------------------------------------------------------------------------------------------------------------------------------------------------------------------------------------------------------------------------------------------------------------------------------------------------------------------------------------------------------------------------------------------------------------------------------------------------------------------------------------------------------------------------------------------------------------------------------------------------------------------------------------------------------------------------------------------------------------------------------------------------------------------------|
| Journal:                        | <i>BMJ Open</i>                                                                                                                                                                                                                                                                                                                                                                                                                                                                                                                                                                                                                                                                                                                                                                                                                                                                                                                                                                                                                                                                                                                                                                                                                                                                                         |
| Manuscript ID                   | bmjopen-2018-023000.R2                                                                                                                                                                                                                                                                                                                                                                                                                                                                                                                                                                                                                                                                                                                                                                                                                                                                                                                                                                                                                                                                                                                                                                                                                                                                                  |
| Article Type:                   | Research                                                                                                                                                                                                                                                                                                                                                                                                                                                                                                                                                                                                                                                                                                                                                                                                                                                                                                                                                                                                                                                                                                                                                                                                                                                                                                |
| Date Submitted by the Author:   | 15-Jan-2019                                                                                                                                                                                                                                                                                                                                                                                                                                                                                                                                                                                                                                                                                                                                                                                                                                                                                                                                                                                                                                                                                                                                                                                                                                                                                             |
| Complete List of Authors:       | Zijlema, Wilma; Instituto de Salud Global Barcelona, Christian, Hayley; The University of Western Australia, School of Population Health<br>Triguero-Mas, Margarita; Instituto de Salud Global Barcelona<br>Cirach, Marta; Instituto de Salud Global Barcelona<br>van den Berg, Magdalena; EMGO Institute for Health and Care Research, VU University Medical Center<br>Maas, Jolanda; Vrije Universiteit Amsterdam, Department of Clinical Psychology<br>Gidlow, Christopher; Staffordshire University, Centre for Sport, Health and Exercise Research<br>Kruize, Hanneke; National Institute for Public Health and the Environment,, Centre of Environmental Health Research<br>Wendel-Vos, Wanda; National Institute for Public Health and the Environment,<br>Andrušaitytė, Sandra; 7. Department of Environmental Sciences, Vytautas Magnus University, Kaunas, Lithuania<br>Grazuleviciene, Regina; Vytauto Didziojo Universitetas, Department of Environmental Sciences<br>Litt, Jill; University of Colorado Boulder, Environmental Studies Program<br>Nieuwenhuijsen, Mark; Instituto de Salud Global de Barcelona (ISGlobal), Centre for International Health Research (CRESIB); Instituto de Salud Global de Barcelona (ISGlobal), Centre for Research in Environmental Epidemiology (CREAL) |
| <b>Primary Subject Heading</b>: | Epidemiology                                                                                                                                                                                                                                                                                                                                                                                                                                                                                                                                                                                                                                                                                                                                                                                                                                                                                                                                                                                                                                                                                                                                                                                                                                                                                            |
| Secondary Subject Heading:      | Public health                                                                                                                                                                                                                                                                                                                                                                                                                                                                                                                                                                                                                                                                                                                                                                                                                                                                                                                                                                                                                                                                                                                                                                                                                                                                                           |
| Keywords:                       | EPIDEMIOLOGY, PUBLIC HEALTH, MENTAL HEALTH                                                                                                                                                                                                                                                                                                                                                                                                                                                                                                                                                                                                                                                                                                                                                                                                                                                                                                                                                                                                                                                                                                                                                                                                                                                              |
|                                 |                                                                                                                                                                                                                                                                                                                                                                                                                                                                                                                                                                                                                                                                                                                                                                                                                                                                                                                                                                                                                                                                                                                                                                                                                                                                                                         |

SCHOLARONE™  
Manuscripts

1  
2  
3 Title4  
5 Dog ownership, the natural outdoor environment and health: a cross-sectional study  
67  
8 Authors9  
10 Wilma L Zijlema<sup>abc\*</sup>, Hayley Christian<sup>d</sup>, Margarita Triguero-Mas<sup>abc</sup>, Marta Cirach<sup>abc</sup>, Magdalena van den  
11 Berg<sup>e</sup>, Jolanda Maas<sup>f</sup>, Christopher Gidlow<sup>g</sup>, Hanneke Kruize<sup>h</sup>, Wanda Wendel-Vos<sup>i</sup>, Sandra Andrusaityte<sup>j</sup>,  
12 Regina Grazuleviciene<sup>j</sup>, Jill Litt<sup>h</sup>, Mark J. Nieuwenhuijsen<sup>abc</sup>  
13  
1415  
16 Affiliations17  
18  
19  
20 <sup>a</sup> Barcelona Institute for Global Health (ISGlobal), Doctor Aiguader 88, 08003 Barcelona, Spain21  
22 <sup>b</sup> Universitat Pompeu Fabra (UPF), Doctor Aiguader 88, 08003 Barcelona, Spain23  
24  
25 <sup>c</sup> CIBER Epidemiología y Salud Pública (CIBERESP), Melchor Fernández Almagro, 3-5, 28029 Madrid,  
26 Spain  
2728  
29  
30 <sup>d</sup> School of Population and Global Health, The University of Western Australia, 35 Stirling Highway,  
31 Crawley, 6009, Perth, Australia  
3233  
34  
35 <sup>e</sup> Department of Public & Occupational Health and EMGO Institute for Health and Care research, VU  
36 University Medical Center, Amsterdam, the Netherlands  
3738  
39  
40 <sup>f</sup> Department of Clinical Psychology, Vrije Universiteit Amsterdam, Van der Boechorstraat 1, 1081 BT  
41 Amsterdam, Netherlands  
4243  
44  
45 <sup>g</sup> Centre for Health and Development, Staffordshire University, Leek Road, Stoke-on-Trent, ST4 7EP,  
46 United Kingdom  
4748  
49  
50 <sup>h</sup> Center for Sustainability, Environment and Health, National Institute for Public Health and the  
51 Environment (RIVM), Antonie van Leeuwenhoeklaan 9, 3721 MA Bilthoven, The Netherlands  
5253  
54  
55 <sup>i</sup> Centre for Nutrition, Prevention and Health Services, National Institute for Public Health and the  
56 Environment (RIVM), Antonie van Leeuwenhoeklaan 9, 3721 MA Bilthoven, The Netherlands  
57  
58  
59  
60

1  
2  
3 <sup>j</sup> Department of Environmental Sciences, Vytautas Magnus University, K. Donelaicio str. 58, 44248  
4  
5 Kaunas, Lithuania  
6

7  
8 <sup>h</sup> Environmental Studies Program, University of Colorado Boulder, 4001 Discovery Drive, Boulder, CO  
9  
10 80303, United States.  
11

12  
13  
14  
15 \*Corresponding author

16  
17 Wilma L Zijlema PhD

18  
19 Barcelona Institute for Global Health (ISGlobal)

20  
21 Barcelona Biomedical Research Park (PRBB)

22  
23 Doctor Aiguader 88, 08003 Barcelona, Spain

24  
25 Tel: +34 932147300, Fax: +34 93 214 73 02, E-mail: [wilma.zijlema@isglobal.org](mailto:wilma.zijlema@isglobal.org)  
26  
27  
28  
29  
30  
31  
32  
33  
34  
35  
36  
37  
38  
39  
40  
41  
42  
43  
44  
45  
46  
47  
48  
49  
50  
51  
52  
53  
54  
55  
56  
57  
58  
59  
60

## Abstract

### Objectives

Dog owners walking their dog in natural outdoor environments (NOE) may benefit from the physical activity facilitated by dog walking and from time spent in nature. However, it is unclear whether dog owners receive additional health benefits associated with having access to NOE above the physical activity benefit of walking with their dog. We investigated associations between dog ownership, walking, time spent in NOE, and health and whether these associations differed among those with good and poor access to NOE and those living in green and less green areas.

### Design

Cross-sectional study

### Setting

The Positive Health Effects of the Natural Outdoor Environment in Typical Populations in Different Regions in Europe (PHENOTYPE) project.

### Participants

n=3586 adults from Barcelona (Spain), Doetinchem (the Netherlands), Kaunas (Lithuania), and Stoke-on-Trent (United Kingdom).

### Data collection and analysis

We calculated access to NOE with land maps and residential surrounding greenness with satellite data. Leisure time walking, time spent in NOE, and general and mental health status were measured using validated questionnaires. Associations were estimated using multilevel analysis with a random intercept defined at the neighborhood level.

### Results

Dog ownership was associated with higher rates of leisure time walking and time spending in NOE (odds ratio 2.17, 95% CI 1.86, 2.54 and 2.37, 95% CI 2.02, 2.79 respectively). These associations were stronger

1  
2  
3 in those living within 300m of a NOE and in greener areas. No consistent associations were found  
4  
5 between dog ownership and perceived general or mental health status.  
6

## 7 8 Conclusions

9  
10 Compared with non-dog owners, dog owners walked more and spent more time in NOE, especially those  
11  
12 living within 300m of a NOE and in greener areas. The health implications of these relationships should  
13  
14 be further investigated. In a largely physically inactive society, dog walking in NOE may be a simple way  
15  
16 of promoting physical activity and health.  
17

- 18  
19  
20  
21  
22 • This is one of the first studies from mainland Europe, and the multi-city approach revealed  
23  
24 differences between cities concerning dog ownership and health.
- 25  
26 • The assessment of access to natural outdoor environments suitable for physical activity using  
27  
28 road network buffers was chosen to optimally capture the relation with people's walking  
29  
30 behavior.
- 31  
32 • The use of multiple exposure indicators of natural outdoor environments enabled studying these  
33  
34 exposure indicators simultaneously, and could help understand what metric best predicts the  
35  
36 health benefits associated with natural outdoor environments.
- 37  
38 • We cannot establish the direction of the observed relationships because of the cross-sectional  
39  
40 study design.
- 41  
42  
43  
44 • We had no detailed information about dog ownership (e.g. level of attachment, duration of dog  
45  
46 ownership, primary caretaker) and we did not know if the time spent in natural outdoor  
47  
48 environments and leisure time walking was undertaken together with the dog.  
49  
50  
51  
52  
53

## 54 55 Competing interests

56  
57  
58 None declared  
59  
60

## Funding

This work was supported by the European Community's Seventh Framework Programme (FP7/2007-2013) under grant agreement no 282996. W.L. Zijlema is supported by a Sara Borrell grant from the Instituto de Salud Carlos III (CD17/00195). H. Christian is supported by an Australian National Heart Foundation Future Leader Fellowship (#100794). ISGlobal is a member of the CERCA Programme, Generalitat de Catalunya. The funders had no role in study design, data collection and analysis, decision to publish, or preparation of the manuscript.

## Author's Contributions

WLZ conducted the analyses. WLZ, HC and JL drafted the manuscript. MTM, MC, MB, JM, CG, HK, WWV, SA, RG, MJN were involved in the design of and data acquisition in the PHENOTYPE study. All authors provided input on the manuscript and agreed with the final version.

## Acknowledgements

The authors thank Sandra Márquez and Xavier Basagaña for their valuable advice in the statistical analyses and the PHENOTYPE respondents for their contribution.

## Data sharing statement

Additional data are available upon request from the corresponding author (WLZ:

[Wilma.zijlema@isglobal.org](mailto:Wilma.zijlema@isglobal.org)).



## INTRODUCTION

In an urbanized world, where people spend the majority of their time indoors [1], physical inactivity is a major public health problem [2]. It not only leads to adverse health effects but it is also a large economic burden for society [3]. Physical activity behavior is influenced by many factors. Apart from individual-level factors including age, sex, and health status, the built environment is an important determinant of physical activity [4,5]. Aspects of the built environment such as the availability of parks are associated with increased physical activity, especially walking [6,7]. It is important to identify sustainable built environment interventions for increasing physical activity and improving health.

Promotion of walking could be a population-level strategy to address physical inactivity. As such, and considering the prevalence of dog ownership (e.g. 18% in the Netherlands [8]), dog walking has been identified as a simple way of promoting physical activity [9–12]. There is strong evidence to suggest that dog owners walk more often and are more physically active than non-dog owners [12–14]. This association has been observed in adults [15,16], adolescents and children [17–19], in groups with potential limited mobility such as older adults [20–22] and in people with a chronic disease [23]. Consequently, dog walking may lead to better health over time, with benefits ranging from improved wellbeing [24] to fewer doctor visits [25] and a lower risk of cardiovascular disease and mortality [26].

However, not all studies show health benefits of dog ownership [27–29] and a large proportion of dog owners do not walk their dog [30,31]. Of the various factors that influence dog walking behavior, aspects of the built environment seem to be among them [11]. Supportive environments, such as neighborhoods with parks and other types of green infrastructure, are associated with higher physical activity levels of dog owners and are important for promoting dog walking [10,11,32]. Specifically, better park access and park quality (e.g. presence of dog litter bags, water sources) were related to dog walking [11,33,34]. Not all dog owners have access to parks thus improving access to parks in residential areas could be important for facilitating dog walking, especially since local parks are a common place for dog walking [35]. Parks also provide an opportunity for nature contact. Spending time in natural outdoor environments (NOE), such as parks, has been associated with health benefits, for example through facilitating stress reduction, restoration, and social contact [36–38]. Dog owners walking their dog in NOE may benefit from the physical activity facilitated by owning a dog as well as time spent in nature. However, it is unclear whether dog owners receive additional health benefits associated with having access to NOE. According to the theories of health behavior [39] and the social ecological framework [40], identifying the environmental

1  
2  
3 factors that influence health outcomes (e.g. access to NOE) could lead to potential intervention strategies  
4  
5 that could eventually improve health.  
6

7  
8 The aim of this study was to investigate the relationships between dog ownership, walking, the NOE and  
9  
10 health. In line with above-mentioned studies and health behavior theories, we hypothesized that dog owners  
11  
12 walk more, spend more time in NOE and are healthier than non-dog owners, and that the health benefits  
13  
14 are more apparent in dog owners within green neighborhoods and with access to NOE compared to those  
15  
16 in less green areas and with poor NOE access. We therefore investigated the associations between dog  
17  
18 ownership, leisure time walking, time spent in NOE, and general and mental health status, and whether  
19  
20 these associations differed among those with good and poor access to NOE and those living in green and  
21  
22 less green areas.  
23

## 24 METHOD

### 25 26 Study design and participants 27

28  
29 This study analyzed data from the Positive Health Effects of the Natural Outdoor environment in Typical  
30  
31 Populations in different regions in Europe (PHENOTYPE) project. Respondents were recruited from 30  
32  
33 different neighborhoods in Barcelona (Spain), Doetinchem (the Netherlands), Kaunas (Lithuania), and  
34  
35 Stoke-on-Trent (United Kingdom) [41,42]. Neighborhoods were selected to maximize variability in access  
36  
37 to NOE and socioeconomic status. In order to arrive at a final sample of approximately 1000 respondents  
38  
39 per city, a random sample of 30 to 35 addresses per neighborhood were mailed with a letter explaining the  
40  
41 purpose of the project after which they were visited by interviewers. In Doetinchem, persons were asked to  
42  
43 send back an answer card to indicate their willingness to participate before they were visited by the  
44  
45 interviewers; and in Kaunas, persons were approached by mail to fill out postal questionnaires. Respondents  
46  
47 needed to have an age between 18 and 75 years and to be able to speak the local language. Data were  
48  
49 collected using interview-administered questionnaires (except in Kaunas, where self-administered  
50  
51 questionnaires were used) at respondents' residences during May-November 2013. The study was  
52  
53 conducted in accordance with the Declaration of Helsinki. All respondents provided written informed  
54  
55 consent and study protocols were approved by local ethical committees (Parc de Salut Mar, Clinical  
56  
57 Research Ethics Committee reference number 2011/4206/I; Medisch Ethische Toestingscommissie UMCU  
58  
59 reference number 12/595; Lietuvos Bioetikos Komitetas reference number 6B-12-147; Faculty of Health  
60  
61 Sciences' Ethics Panel, no reference number).

## Patient and Public Involvement

Participant and stakeholder involvement and dissemination of results was organized in multiple ways through symposia, workshops, online media channels and newsletters. Members of the public were not directly involved in the design or conception of the study.

## Data

### Explanatory variables

#### Dog ownership

Dog ownership was assessed using the question: “Do you own a dog” (yes; no).

*Access to NOE* was estimated with land use maps from local sources in each city (details in [42]). Only NOE that were publically available; suitable for physical activity; and at least 0.5 hectare (e.g. parks, semi-natural/natural land, formal recreation grounds) or 0.25 hectare (natural/green corridors) were selected as these were relevant for physical activity [42] and therefore potentially relevant in terms of the health benefits of NOE for dog owners. Road network buffers were chosen over circular buffers in order to capture a more realistic measure of NOE accessibility on foot [43], which may be most relevant to dog walking. We furthermore used three predetermined buffer sizes to obtain a better understanding of what distance to NOE is most beneficial to health [44]. Using GIS we constructed three indicators: (1) the number of, and (2) the total surface area NOE within road network buffers of 300m, 500m, and 1000m, and (3) the road network distance to the nearest NOE (Figure 1). The number of and area of NOE were dichotomized using the city-specific median values. Distance to nearest NOE was dichotomized using a 300m cut off according to guidelines [45].

*Residential surrounding greenness* was assessed using the normalized difference vegetation index (NDVI). The NDVI is a measure of vegetation and represents the photosynthetic activity in an area [42,46]. Healthy vegetation absorbs most visible light and reflects large parts of near-infrared light, while sparse vegetation reflects more visible light and less near-infrared light. Based on this distinction a value between -1 and +1 is calculated, with higher values indicating a higher density of green vegetation [46]. The NDVI was derived from Landsat 5 and 8 satellite images at a resolution of 30 m × 30 m on cloud-free images within the greenest season (April to September) in the relevant period for this study (2011-2013). Average NDVI

1  
2  
3 values were calculated within (Euclidean) buffers of 100m, 300m, and 500m around the residence, as used  
4  
5 in previous research [47,48], and dichotomized using the city-specific median value.  
6  
7

8  
9 (Figure 1 here)

10  
11 Figure 1. Example of different buffer types and the distance to natural outdoor environments from a  
12  
13 residential address.  
14

15  
16 Outcome variables

17  
18  
19 Leisure time walking

20  
21 Walking in leisure time was assessed by the following questions: “When thinking about a normal week in  
22  
23 the past month how many days per week do you walk in your leisure time” and “How much time (minutes)  
24  
25 per day do you spend walking in your leisure time”. These items were derived from the short questionnaire  
26  
27 to assess health-enhancing physical activity (SQUASH) [49]. The SQUASH is a valid measure of physical  
28  
29 activity [49,50]. Duration and frequency of walking was multiplied to create a composite variable of  
30  
31 minutes per week of leisure time walking. This composite variable was then dichotomized using the median  
32  
33 (120 minutes/week) as a cut point. City-specific cut points were made for city-specific analyses (Barcelona:  
34  
35 120 min/week; Doetinchem: 120 min/week; Kaunas: 240 min/week; and Stoke-on-Trent: 20 min/week).  
36

37  
38 Time spent in NOE

39  
40 NOE were defined as all public and private outdoor spaces that contain ‘green’ and/or ‘blue’ natural  
41  
42 elements such as street trees, forests, city parks and natural parks/reserves, and also included all types of  
43  
44 waterbodies such as canals, ponds, creeks, rivers, beaches. Time spent in NOE was assessed using two  
45  
46 questions: “How often did you visit/go in the last 4 weeks on purpose to green or blue space near your  
47  
48 home?” (5-point response scale ranging from ‘never’ (1) to ‘almost daily’ (5)); and “How much time did  
49  
50 you spend in a green or blue space near your home?” (4-point response scale ranging from <1 h (1) to 6–  
51  
52 10 h (4)). A composite variable was created to determine the amount of time (frequency of visits multiplied  
53  
54 by average duration per visit) respondents spent in NOE near home per month. As frequency and duration  
55  
56 were assessed with questions with categorical response scales, the central value of each answer category  
57  
58 for frequency were multiplied with central value of each answer category for duration (e.g. 3-5 h/month  
59  
60 was coded as 4 h/month). The composite variable was then dichotomized using the median (4 hours/month)

1  
2  
3 as a cut point. City-specific cut points were made for city-specific analyses (Barcelona: 3.75 h/month;  
4  
5 Doetinchem: 10 h/month; Kaunas: 4 h/month; and Stoke-on-Trent: 1 h/month).

#### 6 7 8 General health status

9  
10 General health status was assessed using the question: “In general what would you say your health is?” (5  
11  
12 point response scale: excellent to poor), which was derived from the Medical Outcome Study Short Form  
13  
14 (SF-36) [51]. Scores were dichotomized into “fair or poor” (0) and “excellent, very good, and good” (1).  
15  
16 This single question has been found to be associated with poor health outcomes in the general population  
17  
18 [52,53].

#### 19 20 21 Mental health

22  
23 Mental health was assessed using the Short Form Health Survey (SF-36) mental health subscale, including  
24  
25 five items (e.g. nervousness, depression), and is a valid and reliable measure of mental health [54].  
26  
27 Respondents rated the occurrence of symptoms in the past four weeks on a 6-point scale ranging from “all  
28  
29 of the time” (1) to “none of the time” (6). A sum score was calculated and transformed into a scale ranging  
30  
31 from 0 to 100 according to guidelines [51] with higher scores indicating better mental health. When  $\geq 3$   
32  
33 items were missing, respondents were excluded from the analyses, but when 1-2 items were missing,  
34  
35 missing values were replaced by the average score of the other items. We did this for 17 respondents.  
36  
37 Analyses including and excluding these 17 respondents did not alter the results.

#### 38 39 40 Covariates and other variables

41  
42 Information about sociodemographic factors included sex, age, educational level (primary school or no  
43  
44 education; secondary school/ further education (up to 18 years); university degree or higher), household  
45  
46 composition (alone; with partner (without children); with children <12 yr old; with children >12 yr old; and  
47  
48 other), perceived income situation (cannot make ends meet; enough to get by; comfortable), frequency of  
49  
50 contact with family and/or friends ((almost daily;  $\geq 1$  per week; 1-3 per month or less), and whether  
51  
52 respondents feel part of a group of friends ((totally) agree; neutral, (totally) disagree). We also included  
53  
54 perceived safety of neighborhood NOE (very satisfied; satisfied; neutral; dissatisfied; very dissatisfied).  
55  
56 Health-related factors included disability restricting mobility (yes; no), one or more chronic diseases (yes;  
57  
58 no), body mass index (based on self reported height and weight: healthy weight  $\leq 25$  kg/m<sup>2</sup>; overweight 25-  
59  
60 30 kg/m<sup>2</sup>; obese >30 kg/m<sup>2</sup>), and smoking status (current; former; never). Neighborhood socioeconomic

1  
2  
3 status (SES, low; intermediate; high) was based on country-specific data (Barcelona: deprivation index  
4 based on census data 2001 [55]; Doetinchem: average monthly household income per 6-digit zip code  
5 level [56]; Kaunas: neighborhood education level [57]; Stoke-on-Trent: English indices of deprivation 2010  
6 [58]).  
7  
8  
9

#### 10 11 12 13 14 Statistical analyses 15

16  
17 Equivalence tests with Benjamini-Hochberg adjustments for false discovery rates (5%) [59] were used to  
18 test for differences between dog owner and non-dog owner characteristics. To investigate the association  
19 between dog ownership, and outcomes leisure time walking, time spent in NOE, and general and mental  
20 health status, and whether these associations differed for respondents with good/poor access to NOE and  
21 high/low residential surrounding greenness, we investigated:  
22  
23  
24  
25

- 26  
27 1. The associations between dog ownership, and outcomes leisure time walking, time spent in NOE,  
28 general health status, and mental health.  
29
- 30  
31 2. The associations specified at 1, stratified by NOE access (good and poor) and by residential  
32 surrounding greenness (high and low) to investigate whether the associations between dog  
33 ownership and the outcomes differ in these subgroups.  
34  
35  
36

37  
38 Associations were estimated using multilevel analysis with a random intercept defined at the neighborhood  
39 level. Associations with leisure time walking, time spent in NOE and general health status were estimated  
40 with logistic regression because of the dichotomization of the data; and since mental health scores were  
41 normally distributed, associations were estimated with linear regression. Models were adjusted for age, sex,  
42 education level, household composition, perceived income situation, neighborhood SES, NOE safety,  
43 disability restricting mobility, and chronic diseases and were selected because of an assumed relation with  
44 dog ownership, walking, time spent in NOE and health. The main associations (as specified at 1) were also  
45 estimated for the cities separately. Stratified analyses by access to NOE and residential surrounding  
46 greenness were undertaken with indicators in all buffer sizes, but the 500m buffer was reported in the main  
47 table and the remaining buffer sizes in the Supplement. Analyses were based on complete cases (missing  
48 data differed by outcome and ranged between n=360 and 416). All analyses were performed in STATA  
49 14.2 [60].  
50  
51  
52  
53  
54  
55  
56  
57  
58  
59  
60

1  
2  
3 Sensitivity analyses were undertaken to investigate whether additional adjustment for covariates changed  
4 the associations. Additional adjustments were carried out for characteristics that were found to differ  
5 between dog owners and non-dog owners and that may relate to health (smoking and BMI), or that have  
6 been found to be mediators of the dog ownership-health relationship (frequency of contact with family  
7 and/or friends, and whether respondents feel part of a group of friends) [61,62].  
8  
9  
10  
11  
12  
13  
14  
15  
16  
17  
18  
19  
20  
21  
22  
23  
24  
25  
26  
27  
28  
29  
30  
31  
32  
33  
34  
35  
36  
37  
38  
39  
40  
41  
42  
43  
44  
45  
46  
47  
48  
49  
50  
51  
52  
53  
54  
55  
56  
57  
58  
59  
60

For peer review only

## RESULTS

### Population characteristics

Respondents were on average 51.4 (SD 15.9) years old and 54.9% were female. A total of 1109 (30.9%) respondents were dog owners. Dog owners compared with non-dog owners were on average the same age, had similar educational attainment but more were female (59.6% vs. 53.3%) and reported lower perceived income security. Dog ownership varied across cities, with it being highest in Kaunas (41.1%) and lowest in Doetinchem (16.5%). Dog owners walked more and spent more time in NOE compared with non-dog owners. However, dog owners had a lower perceived general and mental health status compared with non-dog owners. Dog owners also reported more frequently that physical constraints restricted their mobility, had more often a chronic disease, and had higher BMI than non-dog owners (Table 1).

(Table 1 here)

### Dog ownership, leisure time walking, time spent in NOE and health

Adjusted multilevel models showed that dog ownership was associated with increased odds of walking  $\geq 121$  minutes per week (i.e. higher than the median amount of walking) (odds ratio [OR]= 2.17, 95% CI 1.86, 2.54) compared with non-dog owners. Dog ownership was also associated with increased odds of spending  $\geq 4$  hours/month in NOE (i.e. higher than the median amount of time in NOE) (OR= 2.37, 95% CI 2.02, 2.79) compared with non-dog owners. There were no differences in perceived general health status and mental health between dog owners and non-dog owners. City-specific analyses showed similar results, with some exceptions: a positive association between dog ownership and perceived general health in Barcelona (OR=1.90, 95% CI 1.01, 3.56); and a positive association between dog ownership and mental health in Stoke-on-Trent ( $\beta$ = 2.61, 95% CI 0.35, 4.86) (Table 2 and Supplemental Table S1).

(Table 2 here)

### Stratified analyses by access to NOE and residential surrounding greenness

Generally, stratified analyses showed that the associations between dog ownership and leisure time walking by number and area of NOE were similar. The association between dog ownership and leisure time walking was stronger for those living within 300m of a NOE (OR= 2.36, 95% CI 1.97, 2.83) compared to those living within >300m of a NOE (OR= 1.86, 95% CI 1.36, 2.55; Table 3). Similar results were observed for



1  
2  
3 those with a high amount of residential surrounding greenness (100 and 300m buffer, Supplemental Table  
4 S2) compared to low residential surrounding greenness.  
5  
6

7  
8 The associations between dog ownership and time spent in NOE were larger for those with a lower number  
9 or area of NOE than for those with a higher number or area of NOE (Table 3 and Supplemental Table S2).  
10 We observed stronger associations between dog ownership and time spent in NOE for those living within  
11 300m of a NOE (OR= 2.64, 95% CI 2.18, 3.20) compared to those living within >300m of a NOE (OR=  
12 1.82, 95% CI 1.31, 2.55; Table 3). Stronger associations between dog ownership and time spent in NOE  
13 for those with more residential surrounding greenness were consistent across buffer sizes 300m and 500m,  
14 but not for residential surrounding greenness within 100m (Table 3 and Supplemental Table S2).  
15  
16  
17  
18  
19  
20  
21

22 There were no associations between dog ownership and perceived general health status when stratifying by  
23 access to NOE or residential surrounding greenness. Similarly, there was no indication for an association  
24 between dog ownership and mental health in groups with high or low access to NOE and with high or low  
25 residential surrounding greenness (Table 3).  
26  
27  
28  
29

30 (Table 3 here)  
31  
32  
33  
34  
35

#### 36 Sensitivity analysis

37  
38 Additional adjustments for smoking, BMI, frequency of contact with family and/or friends, and whether  
39 respondents feel part of a group of friends, did not change the results (results available upon request).  
40  
41  
42  
43  
44  
45

#### 46 DISCUSSION

47  
48 Having a dog was associated with more leisure time walking and time spent in NOE near home compared  
49 with not having a dog. Moreover, the differences in walking and time spent in NOE between dog owners  
50 and non-dog owners were larger when there was a NOE within 300m of the residence, and a high amount  
51 of residential surrounding greenness. There was no consistent evidence for an association between dog  
52 ownership and perceived general and mental health status. Only dog owners from Stoke-on-Trent had better  
53 mental health compared with non-dog owners, and dog owners from Barcelona had better perceived general  
54 health compared to non-dog owners.  
55  
56  
57  
58  
59  
60

1  
2  
3 Prior studies have also observed links between NOE, dog ownership and physical activity. In support of  
4 our findings, a UK study of older adults reported that neighborhood greenness was associated with a smaller  
5 decline in physical activity over time, and that dog walking explained up to 50% of the variance in the  
6 relationship between greenness and outdoor physical activity [63]. Our findings were also consistent with  
7 a Danish study that found that dog ownership was a major determinant of park visits, especially those parks  
8 closest to the residence [35]. Our study adds to the evidence base by including multiple exposure indicators  
9 of NOE which enabled studying multiple exposure indicators of NOE simultaneously, and could help  
10 understand what metric best predicts the health benefits associated with NOE [36,37,41]. We found that  
11 dog owners spent more time in NOE than non-dog owners, but dog ownership was not consistently related  
12 to perceived mental or general health status. Dog ownership was only related to better perceived general or  
13 mental health in Barcelona and Stoke-on-Trent, the two cities where respondents were the least active and  
14 spent the least time in NOE. This suggests that the health benefits of dog ownership exist when walking  
15 and time spent in NOE is low to begin with. Because we found no consistent evidence for health benefits  
16 for dog owners with better availability of NOE, future studies could also investigate subjective indicators  
17 of NOE, including satisfaction and importance, and neighborhood aesthetics [64].

18  
19  
20 Although the cross-sectional nature of our study does not allow for understanding the longitudinal effects  
21 of dog ownership on health, it is possible that people with physical constraints and chronic diseases more  
22 often decide to have a dog, for example following doctor's advice, in order to stay mobile [26]. Similarly,  
23 another study reported that dog owners more often had asthma, and a higher BMI compared with non-dog  
24 owners [28]. Furthermore, an Australian study found that although pet ownership was associated with  
25 higher levels of physical activity, it was also associated with higher self-reported BMI, higher diastolic  
26 blood pressure, and smoking [27]. We found that despite the physical constraints and chronic diseases, dog  
27 owners engaged in more leisure time walking than non-dog owners. We hypothesize that the extra physical  
28 activity facilitated by dog walking may offset some of the other negative health risk factors dog owners  
29 have, and could eventually yield longer term health benefits. This may especially occur in green  
30 neighborhoods, when there is access to NOE and when the residential environment promotes walking.

31  
32  
33 Limitations of this study include the lack of information about the dog (e.g. breed, age, temperament), the  
34 dog owner's level of attachment to their dog, the duration of dog ownership, and if the respondent was the  
35 primary carer of the dog. Such factors may have influenced the potential health benefits of dog ownership,  
36 but we were unable to take these factors into account. We further did not know if the time spent in NOE  
37  
38  
39  
40  
41  
42  
43  
44  
45  
46  
47  
48  
49  
50  
51  
52  
53  
54  
55  
56  
57  
58  
59  
60

1  
2  
3 and leisure time walking was undertaken together with the dog, and whether time spent in NOE was time  
4 spent walking. Future research should measure specific aspects of dog ownership and should use measures  
5 of behavior such as time spent in NOE with and without dog and leisure time walking undertaken with and  
6 without the dog. A limitation of self-reporting walking habits is potential overstatement of the amount of  
7 walking. Minutes of walking and time in NOE were dichotomized because of non-normal distributions and  
8 although this resulted in easier interpretation of data, it also resulted in information loss. Although data  
9 collection was similar in each city, data on neighborhood SES was based on country-specific data and this  
10 might have complicated comparisons between cities. Finally, we cannot establish the direction of the  
11 observed relationships because of the cross-sectional study design. For example, people who are already  
12 physically active and visit NOE may decide to get a dog, instead of dogs motivating their owners to walk  
13 and visit NOE more. Strengths include the multi-city approach, which revealed differences between cities  
14 concerning dog ownership and health. It is also one of the first studies from mainland Europe, since the  
15 majority of research has been carried out in North America, Australia, and in the UK. More international  
16 studies about dog ownership and health are needed. Finally, our measure of access to NOE was specific to  
17 environments that were suitable for physical activity. Also, for access to NOE, we used road network  
18 buffers over circular buffers which better capture people's walking behavior; and we used varying buffer  
19 sizes to obtain a better understanding of what distance to NOE is most beneficial to health [44].  
20  
21  
22  
23  
24  
25  
26  
27  
28  
29  
30  
31  
32  
33  
34  
35

## 36 Conclusions

37  
38  
39 Dog owners performed more leisure time walking and spent more time in NOE compared with non-dog  
40 owners, especially when they lived within 300m of a NOE and when they lived in green areas. There was  
41 no consistent relationship between dog ownership and better perceived general or mental health status. In  
42 a largely physically inactive society where many people remain indoors, dog walking in parks or other NOE  
43 may be an opportunity to engage people in walking behavior as a path towards better health. Cities should  
44 therefore ensure that there is access to NOE for dog owners and provide green infrastructure in order to  
45 promote dog walking. Future research should focus on natural experiments and evaluation of intervention  
46 strategies to increase dog owners' access to NOE.  
47  
48  
49  
50  
51  
52  
53  
54  
55  
56  
57

## 58 REFERENCES

59  
60

- 1  
2  
3 1 Schweizer C, Edwards RD, Bayer-Oglesby L, *et al*. Indoor time–microenvironment–activity  
4 patterns in seven regions of Europe. *J Expo Sci Environ Epidemiol* 2007;**17**:170–81.  
5  
6 doi:10.1038/sj.jes.7500490  
7  
8  
9  
10 2 Hallal PC, Andersen LB, Bull FC, *et al*. Global physical activity levels: Surveillance progress,  
11 pitfalls, and prospects. *Lancet* 2012;**380**:247–57. doi:10.1016/S0140-6736(12)60646-1  
12  
13  
14 3 Ding D, Lawson KD, Kolbe-Alexander TL, *et al*. The economic burden of physical inactivity: a  
15 global analysis of major non-communicable diseases. *Lancet* 2016;**388**:1311–24.  
16  
17 doi:10.1016/S0140-6736(16)30383-X  
18  
19  
20  
21 4 McCormack GR, Shiell A. In search of causality: a systematic review of the relationship between  
22 the built environment and physical activity among adults. *Int J Behav Nutr Phys Act* 2011;**8**:125.  
23  
24 doi:10.1186/1479-5868-8-125  
25  
26  
27  
28 5 Bauman AE, Reis RS, Sallis JF, *et al*. Correlates of physical activity: why are some people  
29 physically active and others not? *Lancet (London, England)* 2012;**380**:258–71.  
30  
31 doi:10.1016/S0140-6736(12)60735-1  
32  
33  
34 6 Sallis JF, Cerin E, Conway TL, *et al*. Physical activity in relation to urban environments in 14  
35 cities worldwide: a cross-sectional study. *Lancet* 2016;**387**:2207–17. doi:10.1016/S0140-  
36 6736(15)01284-2  
37  
38  
39  
40 7 Schipperijn J, Cerin E, Adams MA, *et al*. Access to parks and physical activity: An eight country  
41 comparison. *Urban For Urban Green* 2017;**27**:253–63. doi:10.1016/j.ufug.2017.08.010  
42  
43  
44  
45 8 van Heijst B, de Kort M, Overgaauw P, *et al*. Rapport Feiten en Cijfers Gezelschapsdierensector  
46 2015. 2015. [https://www.rijksoverheid.nl/documenten/rapporten/2015/11/03/feiten-cijfers-](https://www.rijksoverheid.nl/documenten/rapporten/2015/11/03/feiten-cijfers-gezelschapsdierensector-2015)  
47 [gezelschapsdierensector-2015](https://www.rijksoverheid.nl/documenten/rapporten/2015/11/03/feiten-cijfers-gezelschapsdierensector-2015)  
48  
49  
50  
51 9 Lail P, McCormack GR, Rock M, *et al*. Does dog-ownership influence seasonal patterns of  
52 neighbourhood-based walking among adults? A longitudinal study. *BMC Public Health*  
53 2011;**11**:148. doi:10.1186/1471-2458-11-148  
54  
55  
56  
57  
58 10 Cutt H, Giles-Corti B, Knuiman M, *et al*. Dog ownership, health and physical activity: A critical  
59 review of the literature. *Health Place* 2007;**13**:261–72. doi:10.1016/j.healthplace.2006.01.003  
60

- 1  
2  
3 11 Westgarth C, Christley RM, Christian HE, *et al.* How might we increase physical activity through  
4 dog walking?: A comprehensive review of dog walking correlates. *Int J Behav Nutr Phys Act*  
5 2014;**11**:83. doi:10.1186/1479-5868-11-83  
6  
7  
8  
9  
10 12 Christian H, Bauman A, Epping JN, *et al.* Encouraging Dog Walking for Health Promotion and  
11 Disease Prevention. *Am J Lifestyle Med* 2018;**12**:233–43. doi:10.1177/1559827616643686  
12  
13  
14 13 Christian HE, Westgarth C, Bauman A, *et al.* Dog ownership and physical activity: a review of  
15 the evidence. *J Phys Act Health* 2013;**10**:750–9. <http://www.ncbi.nlm.nih.gov/pubmed/23006510>  
16 (accessed 11 Aug2017).  
17  
18  
19  
20  
21 14 Toohey AM, Rock MJ. Unleashing their potential: a critical realist scoping review of the  
22 influence of dogs on physical activity for dog-owners and non-owners. *Int J Behav Nutr Phys Act*  
23 2011;**8**:46. doi:10.1186/1479-5868-8-46  
24  
25  
26  
27 15 Hoerster KD, Mayer JA, Sallis JF, *et al.* Dog walking: Its association with physical activity  
28 guideline adherence and its correlates. *Prev Med (Baltim)* 2011;**52**:33–8.  
29 doi:10.1016/j.ypmed.2010.10.011  
30  
31  
32  
33  
34 16 Coleman KJ, Rosenberg DE, Conway TL, *et al.* Physical activity, weight status, and  
35 neighborhood characteristics of dog walkers. *Prev Med (Baltim)* 2008;**47**:309–12.  
36 doi:10.1016/j.ypmed.2008.05.007  
37  
38  
39  
40 17 Westgarth C, Boddy LM, Stratton G, *et al.* A cross-sectional study of frequency and factors  
41 associated with dog walking in 9–10 year old children in Liverpool, UK. *BMC Public Health*  
42 2013;**13**:822. doi:10.1186/1471-2458-13-822  
43  
44  
45  
46  
47 18 Christian H, Trapp G, Lauritsen C, *et al.* Understanding the relationship between dog ownership  
48 and children’s physical activity and sedentary behaviour. *Pediatr Obes* 2013;**8**:392–403.  
49 doi:10.1111/j.2047-6310.2012.00113.x  
50  
51  
52  
53  
54 19 Sirard JR, Patnode CD, Hearst MO, *et al.* Dog Ownership and Adolescent Physical Activity. *Am*  
55 *J Prev Med* 2011;**40**:334–7. doi:10.1016/j.amepre.2010.11.007  
56  
57  
58  
59 20 Shibata A, Oka K, Inoue S, *et al.* Physical Activity of Japanese Older Adults Who Own and Walk  
60 Dogs. *Am J Prev Med* 2012;**43**:429–33. doi:10.1016/j.amepre.2012.06.019

- 1  
2  
3 21 Feng Z, Dibben C, Witham MD, *et al.* Dog ownership and physical activity in later life: A cross-  
4 sectional observational study. *Prev Med (Baltim)* 2014;**66**:101–6.  
5  
6 doi:10.1016/j.ypmed.2014.06.004  
7  
8  
9  
10 22 Wu YT, Luben R, Jones A. Dog ownership supports the maintenance of physical activity during  
11 poor weather in older English adults: Cross-sectional results from the EPIC Norfolk cohort. *J*  
12 *Epidemiol Community Health* 2017;**71**:905–11. doi:10.1136/jech-2017-208987  
13  
14  
15  
16 23 Arbillaga-Etxarri A, Gimeno-Santos E, Barberan-Garcia A, *et al.* Socio-environmental correlates  
17 of physical activity in patients with chronic obstructive pulmonary disease (COPD). *Thorax*  
18 2017;:thoraxjnl-2016-209209. doi:10.1136/thoraxjnl-2016-209209  
19  
20  
21  
22  
23 24 McConnell AR, Brown CM, Shoda TM, *et al.* Friends with benefits: On the positive  
24 consequences of pet ownership. *J Pers Soc Psychol* 2011;**101**:1239–52. doi:10.1037/a0024506  
25  
26  
27  
28 25 Headey B, Grabka MM. Pets and Human Health in Germany and Australia: National  
29 Longitudinal Results. *Soc Indic Res* 2007;**80**:297–311. doi:10.1007/s11205-005-5072-z  
30  
31  
32  
33 26 Mubanga M, Byberg L, Nowak C, *et al.* Dog ownership and the risk of cardiovascular disease  
34 and death – a nationwide cohort study. *Sci Rep* 2017;**7**:15821. doi:10.1038/s41598-017-16118-6  
35  
36  
37  
38 27 Parslow RA, Jorm AF. Pet ownership and risk factors for cardiovascular disease: another look.  
39 *Med J Aust* 2003;**179**:466–8.  
40  
41  
42 28 Saunders J, Parast L, Babey SH, *et al.* Exploring the differences between pet and non-pet owners:  
43 Implications for human-animal interaction research and policy. *PLoS One* 2017;**12**:e0179494.  
44 doi:10.1371/journal.pone.0179494  
45  
46  
47  
48 29 Torske MO, Krokstad S, Stamatakis E, *et al.* Dog ownership and all-cause mortality in a  
49 population cohort in Norway: The HUNT study. *PLoS One* 2017;**12**:e0179832.  
50 doi:10.1371/journal.pone.0179832  
51  
52  
53  
54 30 Richards EA. Does Dog Walking Predict Physical Activity Participation: Results From a National  
55 Survey. *Am J Health Promot* 2016;**30**:323–30. doi:10.1177/0890117116646335  
56  
57  
58  
59 31 Richards EA, Ogata N, Cheng C-W. Evaluation of the Dogs, Physical Activity, and Walking  
60

- 1  
2  
3 (Dogs PAW) Intervention: A Randomized Controlled Trial. *Nurs Res* 2016;**65**:191–201.  
4  
5 doi:10.1097/NNR.0000000000000155  
6  
7  
8 32 Richards EA, McDonough MH, Edwards NE, *et al.* Psychosocial and environmental factors  
9 associated with dog-walking. *Int J Heal Promot Educ* 2013;**51**:198–211.  
10  
11 doi:10.1080/14635240.2013.802546  
12  
13  
14 33 Christian (nee Cutt) H, Giles-Corti B, Knuiman M. ‘I’m Just a’-Walking the Dog’ Correlates of  
15 Regular Dog Walking. *Fam Community Health* 2010;**33**:44–52.  
16  
17 doi:10.1097/FCH.0b013e3181c4e208  
18  
19  
20 34 Cutt H, Giles-Corti B, Knuiman M. Encouraging physical activity through dog walking: Why  
21 don’t some owners walk with their dog? *Prev Med (Baltim)* 2008;**46**:120–6.  
22  
23 doi:10.1016/j.ypmed.2007.08.015  
24  
25  
26 35 Schipperijn J, Stigsdotter UK, Randrup TB, *et al.* Influences on the use of urban green space – A  
27 case study in Odense, Denmark. *Urban For Urban Green* 2010;**9**:25–32.  
28  
29 doi:10.1016/j.ufug.2009.09.002  
30  
31  
32  
33 36 Frumkin H, Bratman GN, Breslow SJ, *et al.* Nature Contact and Human Health: A Research  
34 Agenda. *Environ Health Perspect* 2017;**125**:75001. doi:10.1289/EHP1663  
35  
36  
37 37 Nieuwenhuijsen MJ, Khreis H, Triguero-Mas M, *et al.* Fifty shades of green. *Epidemiology*.  
38 2017;**28**:63–71. doi:10.1097/EDE.0000000000000549  
39  
40  
41  
42 43 Markevych I, Schoierer J, Hartig T, *et al.* Exploring pathways linking greenspace to health:  
44 Theoretical and methodological guidance. *Environ Res* 2017;**158**:301–17.  
45  
46 doi:10.1016/j.envres.2017.06.028  
47  
48  
49 39 Brug J, Oenema A, Ferreira I. Theory, evidence and Intervention Mapping to improve behavior  
50 nutrition and physical activity interventions. *Int J Behav Nutr Phys Act* 2005;**2**:2.  
51  
52 doi:10.1186/1479-5868-2-2  
53  
54  
55 40 Stokols D. Establishing and maintaining healthy environments. Toward a social ecology of health  
56 promotion. *Am Psychol* 1992;**47**:6–22.<http://www.ncbi.nlm.nih.gov/pubmed/1539925> (accessed  
57  
58 29 Oct2018).  
59  
60

- 1  
2  
3 41 Nieuwenhuijsen MJ, Kruize H, Gidlow C, *et al.* Positive health effects of the natural outdoor  
4 environment in typical populations in different regions in Europe (PHENOTYPE): a study  
5 programme protocol. *BMJ Open* 2014;**4**:e004951. doi:10.1136/bmjopen-2014-004951  
6  
7  
8  
9  
10 42 Smith G, Cirach M, Swart W, *et al.* Characterisation of the natural environment: quantitative  
11 indicators across Europe. *Int J Health Geogr* 2017;**16**:16. doi:10.1186/s12942-017-0090-z  
12  
13  
14 43 Oliver LN, Schuurman N, Hall AW. Comparing circular and network buffers to examine the  
15 influence of land use on walking for leisure and errands. *Int J Health Geogr* 2007;**6**:41.  
16 doi:10.1186/1476-072X-6-41  
17  
18  
19  
20  
21 44 Browning M, Lee K. Within What Distance Does ‘Greenness’ Best Predict Physical Health? A  
22 Systematic Review of Articles with GIS Buffer Analyses across the Lifespan. *Int J Environ Res*  
23 *Public Health* 2017;**14**:675. doi:10.3390/ijerph14070675  
24  
25  
26  
27 45 Annerstedt van den Bosch M, Mudu P, Uscila V, *et al.* Development of an urban green space  
28 indicator and the public health rationale. *Scand J Public Health* 2016;**44**:159–67.  
29 doi:10.1177/1403494815615444  
30  
31  
32  
33  
34 46 Weier J, Herring D. Measuring Vegetation (NDVI & EVI).  
35 2000.[http://earthobservatory.nasa.gov/Features/MeasuringVegetation/measuring\\_vegetation\\_2.ph](http://earthobservatory.nasa.gov/Features/MeasuringVegetation/measuring_vegetation_2.php)  
36 [p](http://earthobservatory.nasa.gov/Features/MeasuringVegetation/measuring_vegetation_2.php) (accessed 28 Jun2018).  
37  
38  
39  
40  
41 47 Dadvand P, Bartoll X, Basagaña X, *et al.* Green spaces and General Health: Roles of mental  
42 health status, social support, and physical activity. *Environ Int* 2016;**91**:161–7.  
43 doi:10.1016/j.envint.2016.02.029  
44  
45  
46  
47 48 McEachan RRC, Prady SL, Smith G, *et al.* The association between green space and depressive  
48 symptoms in pregnant women: moderating roles of socioeconomic status and physical activity. *J*  
49 *Epidemiol Community Health* 2016;**70**:253–9. doi:10.1136/jech-2015-205954  
50  
51  
52  
53  
54 49 Wendel-Vos GCW, Schuit AJ, Saris WHM, *et al.* Reproducibility and relative validity of the  
55 short questionnaire to assess health-enhancing physical activity. *J Clin Epidemiol* 2003;**56**:1163–  
56 9.<http://www.ncbi.nlm.nih.gov/pubmed/14680666> (accessed 15 Jun2016).  
57  
58  
59  
60 50 van Poppel MNM, Chinapaw MJM, Mekkink LB, *et al.* Physical Activity Questionnaires for



- 1  
2  
3 Adults. *Sport Med* 2010;**40**:565–600. doi:10.2165/11531930-000000000-00000
- 4  
5  
6 51 Ware JE, Sherbourne CD. The Mos 36-Item Short-Form Health Survey (Sf-36) .1. Conceptual-  
7 Framework and Item Selection. *Med Care* 1992;**30**:473–83. doi:10.1097/00005650-199206000-  
8 00002
- 9  
10  
11  
12 52 Mavaddat N, Kinmonth AL, Sanderson S, *et al.* What determines Self-Rated Health (SRH)? A  
13 cross-sectional study of SF-36 health domains in the EPIC-Norfolk cohort. *J Epidemiol*  
14 *Community Heal* 2011;**65**:800–6. doi:10.1136/jech.2009.090845
- 15  
16  
17  
18 53 Kyffin RGE, Goldacre MJ, Gill M. Mortality rates and self reported health: database analysis by  
19 English local authority area. *BMJ* 2004;**329**:887–8. doi:10.1136/bmj.38238.508021.F7
- 20  
21  
22  
23 54 Ware JE. SF-36 health survey update. *Spine (Phila Pa 1976)* 2000;**25**:3130–  
24 9.<http://www.ncbi.nlm.nih.gov/pubmed/11124729> (accessed 6 Sep2017).
- 25  
26  
27  
28 55 Domínguez-Berjón MF, Borrell C, Cano-Serral G, *et al.* [Constructing a deprivation index based  
29 on census data in large Spanish cities(the MEDEA project)]. *Gac Sanit* 2008;**22**:179–  
30 87.<http://www.ncbi.nlm.nih.gov/pubmed/18579042> (accessed 11 Jul2017).
- 31  
32  
33  
34 56 Statistics Netherlands. CBS - Kerncijfers wijken en buurten 2004-2013. Cent. Bur. voor Stat. Den  
35 Haag/Heerlen. 2013.<http://www.cbs.nl/nl-NL/menu/themas/dossiers/nederland->  
36 [regionaal/cijfers/incidenteel/maatwerk/wijk-buurtstatistieken/kwb-recent/default.htm](http://www.cbs.nl/nl-NL/menu/themas/dossiers/nederland-regionaal/cijfers/incidenteel/maatwerk/wijk-buurtstatistieken/kwb-recent/default.htm)
- 37  
38  
39  
40  
41 57 Statistics Lithuania. Population and Housing Census of the Republic of Lithuania, 2011. Vilnius:  
42 2013. [https://osp.stat.gov.lt/documents/.../Report2011\\_Population\\_and\\_Housing\\_Census](https://osp.stat.gov.lt/documents/.../Report2011_Population_and_Housing_Census)
- 43  
44  
45  
46 58 Department for Communities and Local Government. English Indices of Deprivation 2010.  
47 2010.[https://www.gov.uk/government/uploads/system/uploads/attachment\\_data/file/6872/187152](https://www.gov.uk/government/uploads/system/uploads/attachment_data/file/6872/187152)  
48 4.xls
- 49  
50  
51  
52 59 Benjamini Y, Hochberg Y. Controlling the False Discovery Rate: A Practical and Powerful  
53 Approach to Multiple Testing. *J. R. Stat. Soc. Ser. B.* 1995;**57**:289–300. doi:10.2307/2346101
- 54  
55  
56  
57 60 StataCorp. Stata Statistical Software: Release 14. 2015.
- 58  
59  
60 61 Wood L, Giles-Corti B, Bulsara M. The pet connection: pets as a conduit for social capital? *Soc*

1  
2  
3 *Sci Med* 2005;**61**:1159–73. doi:10.1016/j.socscimed.2005.01.017  
4

5  
6 62 Wood L, Martin K, Christian H, *et al.* Social capital and pet ownership – A tale of four cities.  
7

8 *SSM - Popul Heal* 2017;**3**:442–7. doi:10.1016/j.ssmph.2017.05.002  
9

10  
11 63 Dalton AM, Wareham N, Griffin S, *et al.* Neighbourhood greenspace is associated with a slower  
12 decline in physical activity in older adults: A prospective cohort study. *SSM - Popul Heal*  
13

14 2016;**2**:683–91. doi:10.1016/j.ssmph.2016.09.006  
15

16  
17 64 Root ED, Silbernagel K, Litt JS. Unpacking healthy landscapes: Empirical assessment of  
18 neighborhood aesthetic ratings in an urban setting. *Landsc Urban Plan* 2017;**168**:38–47.  
19

20 doi:10.1016/J.LANDURBPLAN.2017.09.028  
21  
22  
23  
24  
25  
26  
27  
28  
29  
30  
31  
32  
33  
34  
35  
36  
37  
38  
39  
40  
41  
42  
43  
44  
45  
46  
47  
48  
49  
50  
51  
52  
53  
54  
55  
56  
57  
58  
59  
60

Tables.

Table 1. Population characteristics by dog-ownership

|                                                        | Total<br>n=3586 | Non-dog-<br>owner<br>n=2478 | Dog owner<br>n=1108 | adjusted<br>p-value* |
|--------------------------------------------------------|-----------------|-----------------------------|---------------------|----------------------|
| Age, mean (SD)                                         | 51.4 (15.9)     | 51.3 (15.9)                 | 51.7 (16.0)         | >.05                 |
| Sex, n (females %)                                     | 1967 (54.9)     | 1314 (53.0)                 | 653 (58.9)          | <.05                 |
| Household composition, n (%)                           |                 |                             |                     | <.05                 |
| <i>alone</i>                                           | 614 (17.1)      | 461 (18.6)                  | 153 (13.8)          |                      |
| <i>with partner (without children)</i>                 | 1239 (34.5)     | 864 (34.9)                  | 375 (33.8)          |                      |
| <i>with children &lt;12 yr old</i>                     | 535 (14.9)      | 383 (15.5)                  | 152 (13.7)          |                      |
| <i>with children &gt;12 yr old</i>                     | 602 (16.8)      | 368 (14.9)                  | 234 (21.1)          |                      |
| <i>other</i>                                           | 597 (16.6)      | 402 (16.2)                  | 195 (17.6)          |                      |
| City, n (%)                                            |                 |                             |                     | <.05                 |
| <i>Barcelona</i>                                       | 979 (27.3)      | 790 (31.9)                  | 189 (17.1)          |                      |
| <i>Doetinchem</i>                                      | 851 (23.7)      | 668 (27.0)                  | 183 (16.5)          |                      |
| <i>Kaunas</i>                                          | 892 (24.9)      | 436 (17.6)                  | 456 (41.1)          |                      |
| <i>Stoke-on-Trent</i>                                  | 864 (24.1)      | 584 (23.6)                  | 280 (25.3)          |                      |
| Education, n (%)                                       |                 |                             |                     | >.05                 |
| <i>low</i>                                             | 251 (7.0)       | 163 (6.6)                   | 88 (7.9)            |                      |
| <i>medium</i>                                          | 1568 (43.7)     | 1087 (43.9)                 | 481 (43.5)          |                      |
| <i>high</i>                                            | 1767 (49.3)     | 1228 (49.6)                 | 539 (48.6)          |                      |
| Perceived income situation, n (%)                      |                 |                             |                     | <.05                 |
| <i>cannot make ends meet</i>                           | 385 (10.7)      | 276 (11.1)                  | 109 (9.8)           |                      |
| <i>enough to get by</i>                                | 1800 (50.2)     | 1165 (47.0)                 | 635 (57.3)          |                      |
| <i>comfortable</i>                                     | 1401 (39.1)     | 1037 (41.9)                 | 364 (32.9)          |                      |
| Weight status (BMI categories), n (%)                  |                 |                             |                     | <.05                 |
| <i>healthy weight</i>                                  | 1610 (44.9)     | 1165 (47.0)                 | 445 (40.2)          |                      |
| <i>overweight</i>                                      | 1192 (33.2)     | 819 (33.1)                  | 373 (33.6)          |                      |
| <i>obese</i>                                           | 784 (21.9)      | 494 (19.9)                  | 290 (26.2)          |                      |
| Physical constraint restricting mobility, n (%)        | 1003 (25.4)     | 536 (19.9)                  | 467 (37.3)          | <.05                 |
| One or more chronic diseases, n (%)                    | 1313 (36.6)     | 860 (34.7)                  | 453 (40.9)          | <.05                 |
| Minutes/week walking (leisure), median (IQR)           | 120 (300)       | 90 (240)                    | 180 (420)           | <.05                 |
| Smoking, n (%)                                         |                 |                             |                     | <.05                 |
| <i>current</i>                                         | 733 (20.5)      | 478 (19.3)                  | 255 (23.0)          |                      |
| <i>former</i>                                          | 1008 (28.1)     | 724 (29.2)                  | 284 (25.6)          |                      |
| <i>never</i>                                           | 1843 (51.4)     | 1275 (51.5)                 | 568 (51.3)          |                      |
| Frequency of contact with family and/or friends, n (%) |                 |                             |                     | >.05                 |
| <i>(almost) daily</i>                                  | 2135 (59.5)     | 1470 (59.3)                 | 665 (60.0)          |                      |
| <i>≥1 per week</i>                                     | 1114 (31.1)     | 781 (31.1)                  | 333 (30.0)          |                      |
| <i>1-3 per month or less</i>                           | 392 (9.4)       | 227 (9.2)                   | 111 (10.0)          |                      |
| Feeling part of a group of friends, n %                |                 |                             |                     | <.05                 |
| <i>(totally) agree</i>                                 | 2414 (67.5)     | 1754 (70.9)                 | 660 (59.7)          |                      |
| <i>neutral, (totally) disagree</i>                     | 1165 (32.5)     | 719 (29.1)                  | 446 (40.3)          |                      |
| Perceived safety of NOE in NBH, n (%)                  |                 |                             |                     | <.05                 |
| <i>(very) satisfied</i>                                | 2123 (59.2)     | 1486 (60.0)                 | 637 (57.5)          |                      |
| <i>neutral</i>                                         | 776 (21.6)      | 542 (21.9)                  | 234 (21.1)          |                      |
| <i>(very) dissatisfied</i>                             | 687 (19.2)      | 450 (18.2)                  | 237 (21.4)          |                      |
| NBH SES, n (%)                                         |                 |                             |                     | >.05                 |
| <i>low</i>                                             | 1131 (31.5)     | 791 (31.9)                  | 340 (30.7)          |                      |

|                                                                              |                      |                      |                      |      |
|------------------------------------------------------------------------------|----------------------|----------------------|----------------------|------|
| <i>medium</i>                                                                | 1379 (38.4)          | 938 (37.9)           | 441 (39.8)           |      |
| <i>high</i>                                                                  | 1076 (30.0)          | 749 (30.2)           | 327 (29.5)           |      |
| Minutes/week walking (leisure),<br>median (IQR)                              | 120 (300)            | 90 (240)             | 180 (420)            | <.05 |
| Hours spent in NOE near home<br>in last 4 wks, median (IQR)                  | 4 (11.8)             | 3.75 (10)            | 10 (29.3)            | <.05 |
| General health, n (%)                                                        |                      |                      |                      | <.05 |
| <i>Excellent</i> , (very) good                                               | 2662 (74.2)          | 1939 (78.3)          | 723 (65.2)           |      |
| <i>(very) Bad</i>                                                            | 924 (25.8)           | 539 (21.8)           | 385 (34.8)           |      |
| Mental health (SF-36), mean<br>(SD)                                          | 73.5 (16.3)          | 73.9 (16.2)          | 72.5 (16.3)          | <.05 |
| Distance to nearest NOE (m),<br>median (IQR)                                 | 161.0 (214)          | 155.7 (205.6)        | 172.4 (232.4)        | <.05 |
| Number of NOE in 300m NWB,<br>median (IQR)                                   | 1 (1)                | 1 (2)                | 1 (2)                | <.05 |
| Number of NOE in 500m NWB,<br>median (IQR)                                   | 1 (1)                | 3 (3)                | 3 (3)                | <.05 |
| Number of NOE in 1000m NWB,<br>median (IQR)                                  | 10 (10)              | 11 (10)              | 8 (10)               | <.05 |
| Area of NOE in 300m NWB<br>(m <sup>2</sup> ), median (IQR)                   | 38,013<br>(136,092)  | 36,007<br>(132,239)  | 41,241<br>(154,377)  | >.05 |
| Area of NOE in 500m NWB<br>(m <sup>2</sup> ), median (IQR)                   | 140,281<br>(286,917) | 137,862<br>(261,453) | 150,758<br>(402,966) | <.05 |
| Area of NOE in 1000m NWB<br>(m <sup>2</sup> ), median (IQR)                  | 588,516<br>(975,551) | 557,191<br>(890,303) | 720,366<br>(239,293) | <.05 |
| Distance to nearest NOE (m),<br>median (IQR)                                 | 161.0 (214)          | 155.7 (205.6)        | 172.4 (232.4)        | <.05 |
| Average residential surrounding<br>greenness in 100m buffer,<br>median (IQR) | 0.46 (0.16)          | 0.44 (0.28)          | 0.50 (0.16)          | <.05 |
| Average residential surrounding<br>greenness in 300m buffer,<br>median (IQR) | 0.49 (0.23)          | 0.47 (0.30)          | 0.51 (0.13)          | <.05 |
| Average residential surrounding<br>greenness in 500m buffer,<br>median (IQR) | 0.49 (0.23)          | 0.48 (0.31)          | 0.51 (0.11)          | <.05 |

NOE= natural outdoor environments; NBH= neighborhood; NWB= network buffer; IQR= interquartile range; SD= standard deviation; BMI= body mass index; SES= socioeconomic status. \* based on t-tests, Chi-square, Kruskal-Wallis, and rank-sum tests and with p-values adjusted for the false discovery rate with the Benjamini-Hochberg Procedure.

Table 2. Associations between dog-ownership, leisure time walking, time spent in NOE near the home, general health status and mental health.

|                         | Leisure time walking<br>(high vs. low) | Time spent in NOE near home (high vs. low) | General health, excellent, (very) good<br>(reference: fair, poor) | Mental health (scale 0-100, higher is better) |
|-------------------------|----------------------------------------|--------------------------------------------|-------------------------------------------------------------------|-----------------------------------------------|
| Dog ownership (vs. not) | OR (95% CI)                            | OR (95% CI)                                | OR (95% CI)                                                       | $\beta$ (95% CI)                              |
| Total                   | 2.17 (1.86; 2.54) n=3586               | 2.37 (2.02; 2.79) n=3530                   | 0.92 (0.73; 1.15) n=3586                                          | 0.24 (-0.89; 1.37) n=3584                     |
| Barcelona               | 1.46 (1.03; 2.08) n=979                | 2.14 (1.47; 3.13) n=978                    | 1.90 (1.01; 3.56) n=979                                           | 0.13 (-2.29; 2.55) n=979                      |
| Doetinchem              | 7.97 (5.18; 12.25) n=851               | 1.18 (0.80; 1.73) n=846                    | 0.89 (0.37; 2.17) n=851                                           | 1.61 (-0.55; 3.78) n=849                      |
| Kaunas                  | 1.05 (0.79; 1.39) n=892                | 1.26 (0.93; 1.69) n=844                    | 0.71 (0.50; 1.00) n=892                                           | -2.17 (-4.40; 0.06) n=892                     |
| Stoke-on-Trent          | 2.01 (1.44; 2.79) n=864                | 2.31 (1.63; 3.27) n=862                    | 0.89 (0.57; 1.37) n=864                                           | 2.61 (0.35; 4.86) n=864                       |

NOE= natural outdoor environments; OR= odds ratio; CI= confidence interval

*Analytical method: mixed models with random intercept for neighborhoods and adjusted for age, sex, education, neighborhood SES, household composition, perceived income situation, perceived NOE safety, physical constraint restricting mobility, and chronic diseases. Analyses were based on complete cases.*

Table 3. Associations between dog-ownership, walking, time in NOE, perceived general and mental health status by access to NOE and residential surrounding greenness.

|                                          |              | Leisure time walking (high vs. low) | Time spent in NOE near home (high vs. low) | General health, excellent, (very) good (reference: fair, poor) | Mental health (scale 0-100, higher is better) |
|------------------------------------------|--------------|-------------------------------------|--------------------------------------------|----------------------------------------------------------------|-----------------------------------------------|
| Dog ownership (vs. not)                  |              | OR (95% CI)                         | OR (95% CI)                                | OR (95% CI)                                                    | $\beta$ (95% CI)                              |
| Number of NOE (500m)                     | lowest       | 2.13 (1.74; 2.62) n=2084            | 2.57 (2.07; 3.17) n=2051                   | 0.89 (0.65; 1.22) n=2084                                       | 0.55 (-0.93; 2.03) n=2082                     |
|                                          | highest      | 2.29 (1.79; 2.94) n=1502            | 2.23 (1.72; 2.89) n=1479                   | 0.90 (0.62; 1.29) n=1502                                       | -0.62 (-2.36; 1.13) n=1502                    |
| Area of NOE (500m)                       | lowest       | 2.36 (1.88; 2.97) n=1779            | 2.53 (2.00; 3.20) n=1753                   | 0.90 (0.64; 1.27) n=1779                                       | 0.85 (-0.83; 2.53) n=1777                     |
|                                          | highest      | 2.04 (1.64; 2.53) n=1807            | 2.19 (1.75; 2.75) n=1777                   | 0.81 (0.59; 1.12) n=1807                                       | -0.48 (-1.20; 1.04) n=1807                    |
| Distance to nearest NOE                  | $\leq 300$ m | 2.36 (1.97; 2.83) n=2778            | 2.64 (2.18; 3.20) n=2746                   | 0.91 (0.69; 1.20) n=2778                                       | 0.66 (-0.61; 1.93) n=2776                     |
|                                          | $> 300$ m    | 1.86 (1.36; 2.55) n=808             | 1.82 (1.31; 2.55) n=784                    | 0.70 (0.46; 1.05) n=808                                        | -1.05 (-3.45; 1.36) n=808                     |
| Residential surrounding greenness (500m) | lowest       | 2.15 (1.70; 2.71) n=1786            | 2.29 (1.81; 2.91) n=1765                   | 0.86 (0.61; 1.21) n=1786                                       | 0.38 (-1.29; 2.05) n=1785                     |
|                                          | highest      | 2.19 (1.77; 2.72) n=1800            | 2.57 (2.04; 3.24) n=1765                   | 0.95 (0.68; 1.33) n=1800                                       | -0.16 (-1.69; 1.36) n=1799                    |

NOE= natural outdoor environments; OR= odds ratio; CI= confidence interval. *Analytical method: mixed models with random intercept for neighborhoods and adjusted for age, sex, education, neighborhood SES, household composition, perceived income situation, perceived NOE safety, physical constraint restricting mobility, and chronic diseases. Analyses were based on complete cases.*

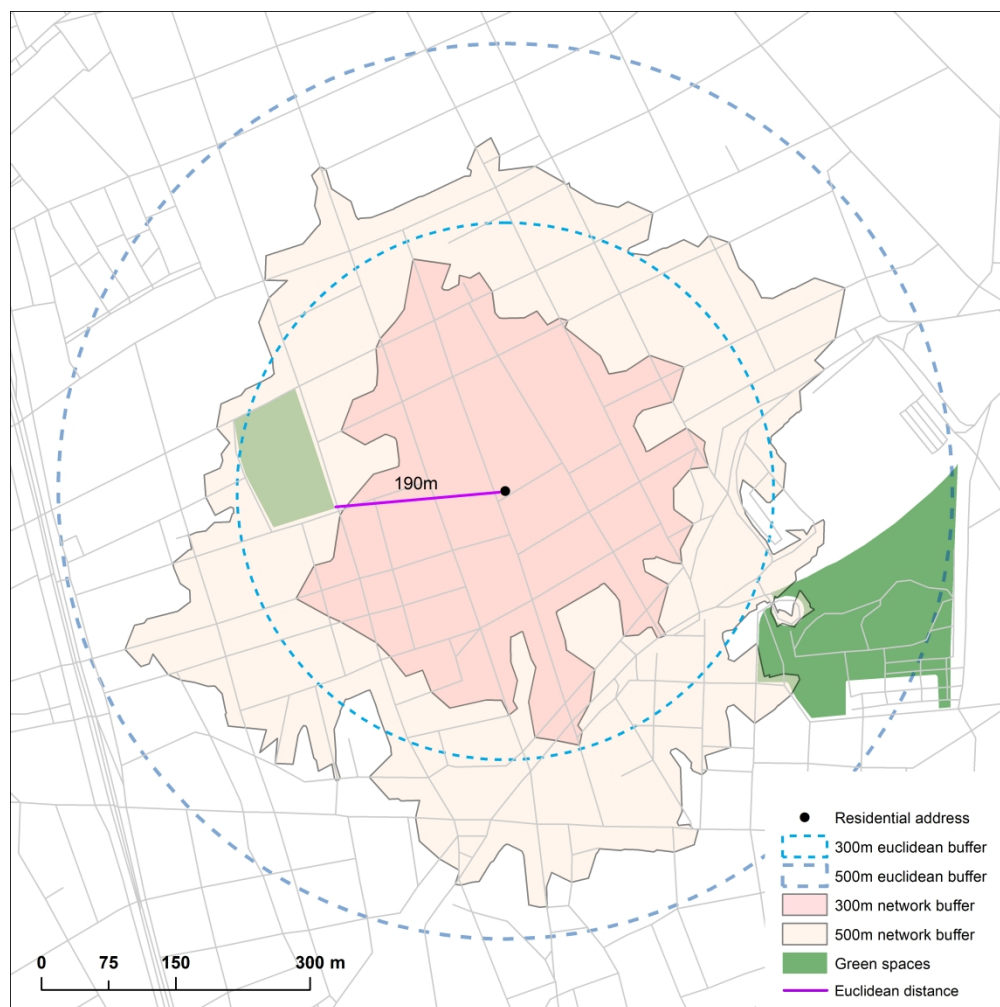

Figure 1. Example of different buffer types and the distance to natural outdoor environments from a residential address.

## Supplemental Material Zijlema et al - Dog ownership, the natural outdoor environment and health: a cross-sectional study

Supplemental Table S1. Full model results of associations between dog-ownership, leisure time walking, time spent in NOE near the home, general health status and mental health.

|                                                        | Leisure time walking<br>(high vs. low) | Time spent in NOE near home (high vs. low) | General health, excellent, (very) good (reference: fair, poor) | Mental health (scale 0-100, higher is better) |
|--------------------------------------------------------|----------------------------------------|--------------------------------------------|----------------------------------------------------------------|-----------------------------------------------|
|                                                        | OR (95% CI)                            | OR (95% CI)                                | OR (95% CI)                                                    | $\beta$ (95% CI)                              |
| Dog ownership (vs. not)                                | 2.17 (1.86; 2.54)                      | 2.37 (2.02; 2.79)                          | 0.92 (0.73; 1.15)                                              | 0.24 (-0.89; 1.37)                            |
| Female sex                                             | 1.15 (1.00; 1.32)                      | 0.88 (0.76; 1.01)                          | 1.12 (0.91; 1.38)                                              | -2.07 (-3.08; -1.07)                          |
| Age                                                    | 1.01 (1.01; 1.02)                      | 1.02 (1.01; 1.02)                          | 0.97 (0.96; 0.98)                                              | 0.07 (0.03; 0.11)                             |
| Household composition (vs. alone)                      |                                        |                                            |                                                                |                                               |
| <i>with partner (without children)</i>                 | 1.04 (0.84; 1.28)                      | 0.99 (0.80; 1.24)                          | 1.01 (0.75; 1.37)                                              | 1.36 (-0.13; 2.85)                            |
| <i>with children &lt;12 yr old</i>                     | 0.87 (0.66; 1.14)                      | 1.55 (1.18; 2.05)                          | 0.88 (0.57; 1.36)                                              | 2.86 (0.95; 4.76)                             |
| <i>with children &gt;12 yr old</i>                     | 0.88 (0.69; 1.13)                      | 1.12 (0.87; 1.44)                          | 1.00 (0.70; 1.45)                                              | 1.77 (0.05; 3.49)                             |
| <i>other</i>                                           | 0.99 (0.76; 1.29)                      | 1.31 (0.99; 1.74)                          | 0.57 (0.39; 0.85)                                              | 1.16 (-0.75; 3.07)                            |
| Education (vs. low)                                    |                                        |                                            |                                                                |                                               |
| <i>medium</i>                                          | 1.72 (1.26; 2.36)                      | 1.41 (1.02; 1.95)                          | 0.99 (0.65; 1.49)                                              | 3.70 (1.55; 5.84)                             |
| <i>high</i>                                            | 2.12 (1.54; 2.93)                      | 1.15 (0.85; 1.54)                          | 1.26 (0.81; 1.97)                                              | 4.91 (-2.69; 7.12)                            |
| Perceived income situation (vs. cannot make ends meet) |                                        |                                            |                                                                |                                               |
| <i>enough to get by</i>                                | 0.79 (0.62; 1.00)                      | 1.12 (0.63; 1.08)                          | 1.67 (1.19; 2.35)                                              | 2.92 (1.22; 4.63)                             |
| <i>comfortable</i>                                     | 0.88 (0.68; 1.13)                      | 1.15 (0.89; 1.50)                          | 5.00 (3.40; 7.36)                                              | 8.06 (6.26; 9.86)                             |
| Physical constraint restricting mobility (vs. not)     | 1.04 (0.88; 1.25)                      | 0.90 (0.75; 1.09)                          | 0.48 (0.39; 0.61)                                              | -0.86 (-2.14; 0.41)                           |
| One or more chronic diseases (vs. not)                 | 1.19 (1.01; 1.40)                      | 0.85 (0.72; 1.01)                          | 0.18 (0.14; 0.22)                                              | -4.16 (-5.34; -2.98)                          |
| Perceived safety of NOE in NBH (vs. very satisfied)    |                                        |                                            |                                                                |                                               |
| <i>satisfied</i>                                       | 1.10 (0.85; 1.44)                      | 0.83 (0.63; 1.08)                          | 1.01 (0.66; 1.56)                                              | -2.47 (-4.33; -0.61)                          |
| <i>neutral</i>                                         | 1.10 (0.83; 1.48)                      | 0.68 (0.51; 0.92)                          | 0.72 (0.46; 1.15)                                              | -4.65 (-6.70; -2.61)                          |
| <i>dissatisfied</i>                                    | 1.31 (0.97; 1.78)                      | 0.74 (0.54; 1.01)                          | 0.61 (0.38; 0.97)                                              | -5.45 (-7.62; -3.28)                          |
| <i>very dissatisfied</i>                               | 1.45 (0.92; 2.30)                      | 0.73 (0.45; 1.17)                          | 0.70 (0.36; 1.37)                                              | -6.01 (-9.28; -2.73)                          |
| NBH SES (vs. low)                                      |                                        |                                            |                                                                |                                               |
| <i>medium</i>                                          | 1.08 (0.87; 1.34)                      | 1.05 (0.79; 1.39)                          | 0.92 (0.45; 1.88)                                              | -0.49 (-2.63; 1.64)                           |
| <i>high</i>                                            | 1.24 (0.99; 1.55)                      | 1.15 (0.85; 1.54)                          | 0.96 (0.46; 1.99)                                              | 0.89 (-1.33; 3.10)                            |

NOE= natural outdoor environments; OR= odds ratio; CI= confidence interval; NBH= neighborhood; SES= socioeconomic status. Analytical method: mixed models with random intercept for neighborhoods and adjusted for age, sex, education, neighborhood SES, household composition, perceived income situation, perceived NOE safety, physical constraint restricting mobility, and chronic diseases. Analyses were based on complete cases.



Supplemental Material Zijlema et al - Dog ownership, the natural outdoor environment and health: a cross-sectional study

Supplemental Table S2. Associations between dog-ownership, walking, time in NOE, perceived general and mental health status by access to NOE and residential surrounding greenness

| Dog ownership (vs. not)      | Leisure time walking (high vs. low) | Time spent in NOE near home (high vs. low) | General health, excellent, (very) good (reference: fair, poor) | Mental health (scale 0-100, higher is better) |                            |
|------------------------------|-------------------------------------|--------------------------------------------|----------------------------------------------------------------|-----------------------------------------------|----------------------------|
|                              | OR (95% CI)                         | OR (95% CI)                                | OR (95% CI)                                                    | $\beta$ (95% CI)                              |                            |
| Number of NOE                | 300m                                |                                            |                                                                |                                               |                            |
|                              | lowest                              | 2.11 (1.76; 2.54) n=2141                   | 2.42 (1.99; 2.94) n=2368                                       | 0.87 (0.66; 1.15) n=2414                      | 0.37 (-0.99; 1.73) n=2412  |
|                              | highest                             | 2.36 (1.77; 3.15) n=1172                   | 2.32 (1.73; 3.12) n=1162                                       | 0.84 (0.54; 1.29) n=1172                      | 0.38 (-1.62; 2.39) n=1172  |
|                              | 1000m                               |                                            |                                                                |                                               |                            |
|                              | lowest                              | 2.17 (1.75; 2.69) n=1869                   | 2.47 (1.98; 3.09) n=1843                                       | 0.85 (0.61; 1.18) n=1869                      | -0.72 (-2.24; 0.81) n=1867 |
|                              | highest                             | 2.20 (1.75; 2.76) n=1717                   | 2.32 (1.82; 2.95) n=1687                                       | 0.87 (0.63; 1.22) n=1717                      | 0.68 (-0.98; 2.34) n=1717  |
| Area of NOE                  | 300m                                |                                            |                                                                |                                               |                            |
|                              | lowest                              | 2.24 (1.80; 2.79) n=1832                   | 2.34 (1.87; 2.94) n=1801                                       | 0.78 (0.56; 1.08) n=1832                      | -0.30 (-1.90; 1.30) n=1830 |
|                              | highest                             | 2.15 (1.72; 2.70) n=1754                   | 2.43 (1.92; 3.08) n=1729                                       | 0.92 (0.65; 1.28) n=1754                      | 0.61 (-0.97; 2.20) n=1754  |
|                              | 1000m                               |                                            |                                                                |                                               |                            |
|                              | lowest                              | 2.19 (1.74; 2.77) n=1799                   | 2.31 (1.83; 2.92) n=1777                                       | 0.74 (0.53; 1.03) n=1799                      | -0.80 (-2.46; 0.87) n=1797 |
|                              | highest                             | 2.18 (1.76; 2.71) n=1787                   | 2.44 (1.94; 3.07) n=1753                                       | 0.94 (0.67; 1.30) n=1787                      | 0.65 (-0.88; 2.18) n=1787  |
| Surrounding greenness (NDVI) | 100m                                |                                            |                                                                |                                               |                            |
|                              | lowest                              | 2.10 (1.67; 2.63) n=1797                   | 2.47 (1.96; 3.12) n=1769                                       | 0.74 (0.53; 1.03) n=1797                      | 0.23 (-1.42; 1.89) n=1796  |
|                              | highest                             | 2.26 (1.81; 2.81) n=1789                   | 2.32 (1.84; 2.92) n=1761                                       | 0.95 (0.68; 1.33) n=1789                      | -0.06 (-1.59; 1.47) n=1788 |
|                              | 300m                                |                                            |                                                                |                                               |                            |
|                              | lowest                              | 1.95 (1.56; 2.44) n=1786                   | 2.33 (1.84; 2.95) n=1757                                       | 0.77 (0.54; 1.09) n=1786                      | 0.43 (-1.25; 2.10) n=1785  |
|                              | highest                             | 2.44 (1.96; 3.04) n=1800                   | 2.50 (1.99; 3.16) n=1773                                       | 0.98 (0.71; 1.36) n=1800                      | -0.11 (-1.62; 1.41) n=1799 |

NOE= natural outdoor environments; OR= odds ratio; CI= confidence interval; NDVI= normalized difference vegetation index. Analytical method: mixed models with random intercept for neighborhoods and adjusted for age, sex, education, neighborhood SES, household composition, perceived income situation, perceived NOE safety, physical constraint restricting mobility, and chronic diseases. Analyses were based on complete cases.

## STROBE Statement—checklist of items that should be included in reports of observational studies

|                          | Item No | Recommendation                                                                                                                                                                                                                                                                                                                                                                                                                                                         | Appears in manuscript on page |
|--------------------------|---------|------------------------------------------------------------------------------------------------------------------------------------------------------------------------------------------------------------------------------------------------------------------------------------------------------------------------------------------------------------------------------------------------------------------------------------------------------------------------|-------------------------------|
| Title and abstract       | 1       | (a) Indicate the study's design with a commonly used term in the title or the abstract                                                                                                                                                                                                                                                                                                                                                                                 | 1, 3                          |
|                          |         | (b) Provide in the abstract an informative and balanced summary of what was done and what was found                                                                                                                                                                                                                                                                                                                                                                    | 3,4                           |
| <b>Introduction</b>      |         |                                                                                                                                                                                                                                                                                                                                                                                                                                                                        |                               |
| Background/rationale     | 2       | Explain the scientific background and rationale for the investigation being reported                                                                                                                                                                                                                                                                                                                                                                                   | 6                             |
| Objectives               | 3       | State specific objectives, including any prespecified hypotheses                                                                                                                                                                                                                                                                                                                                                                                                       | 6                             |
| <b>Methods</b>           |         |                                                                                                                                                                                                                                                                                                                                                                                                                                                                        |                               |
| Study design             | 4       | Present key elements of study design early in the paper                                                                                                                                                                                                                                                                                                                                                                                                                | 7                             |
| Setting                  | 5       | Describe the setting, locations, and relevant dates, including periods of recruitment, exposure, follow-up, and data collection                                                                                                                                                                                                                                                                                                                                        | 7-10                          |
| Participants             | 6       | (a) <i>Cohort study</i> —Give the eligibility criteria, and the sources and methods of selection of participants. Describe methods of follow-up<br><i>Case-control study</i> —Give the eligibility criteria, and the sources and methods of case ascertainment and control selection. Give the rationale for the choice of cases and controls<br><i>Cross-sectional study</i> —Give the eligibility criteria, and the sources and methods of selection of participants | 7                             |
|                          |         | (b) <i>Cohort study</i> —For matched studies, give matching criteria and number of exposed and unexposed<br><i>Case-control study</i> —For matched studies, give matching criteria and the number of controls per case                                                                                                                                                                                                                                                 | n.a.                          |
| Variables                | 7       | Clearly define all outcomes, exposures, predictors, potential confounders, and effect modifiers. Give diagnostic criteria, if applicable                                                                                                                                                                                                                                                                                                                               | 7-10                          |
| Data sources/measurement | 8*      | For each variable of interest, give sources of data and details of methods of assessment (measurement). Describe comparability of assessment methods if there is more than one group                                                                                                                                                                                                                                                                                   | 7-10                          |
| Bias                     | 9       | Describe any efforts to address potential sources of bias                                                                                                                                                                                                                                                                                                                                                                                                              | 7-11                          |
| Study size               | 10      | Explain how the study size was arrived at                                                                                                                                                                                                                                                                                                                                                                                                                              | 7                             |
| Quantitative variables   | 11      | Explain how quantitative variables were handled in the analyses. If applicable, describe which groupings were chosen and why                                                                                                                                                                                                                                                                                                                                           | 7-10                          |
| Statistical methods      | 12      | (a) Describe all statistical methods, including those used to control for confounding                                                                                                                                                                                                                                                                                                                                                                                  | 10-11                         |
|                          |         | (b) Describe any methods used to examine subgroups and interactions                                                                                                                                                                                                                                                                                                                                                                                                    | 10-11                         |
|                          |         | (c) Explain how missing data were addressed                                                                                                                                                                                                                                                                                                                                                                                                                            | 10                            |
|                          |         | (d) <i>Cohort study</i> —If applicable, explain how loss to follow-up was addressed<br><i>Case-control study</i> —If applicable, explain how matching of                                                                                                                                                                                                                                                                                                               | 10-11                         |

|                          |     |                                                                                                                                                                                                              |                                      |
|--------------------------|-----|--------------------------------------------------------------------------------------------------------------------------------------------------------------------------------------------------------------|--------------------------------------|
|                          |     | cases and controls was addressed                                                                                                                                                                             |                                      |
|                          |     | <i>Cross-sectional study</i> —If applicable, describe analytical methods taking account of sampling strategy                                                                                                 |                                      |
|                          |     | (e) Describe any sensitivity analyses                                                                                                                                                                        | 10-11                                |
| <b>Results</b>           |     |                                                                                                                                                                                                              | <b>Appears in manuscript on page</b> |
| Participants             | 13* | (a) Report numbers of individuals at each stage of study—eg numbers potentially eligible, examined for eligibility, confirmed eligible, included in the study, completing follow-up, and analysed            | -                                    |
|                          |     | (b) Give reasons for non-participation at each stage                                                                                                                                                         | -                                    |
|                          |     | (c) Consider use of a flow diagram                                                                                                                                                                           | -                                    |
| Descriptive data         | 14* | (a) Give characteristics of study participants (eg demographic, clinical, social) and information on exposures and potential confounders                                                                     | 11                                   |
|                          |     | (b) Indicate number of participants with missing data for each variable of interest                                                                                                                          | -                                    |
|                          |     | (c) <i>Cohort study</i> —Summarise follow-up time (eg, average and total amount)                                                                                                                             | n.a.                                 |
| Outcome data             | 15* | <i>Cohort study</i> —Report numbers of outcome events or summary measures over time                                                                                                                          | n.a.                                 |
|                          |     | <i>Case-control study</i> —Report numbers in each exposure category, or summary measures of exposure                                                                                                         | n.a.                                 |
|                          |     | <i>Cross-sectional study</i> —Report numbers of outcome events or summary measures                                                                                                                           | Table 1                              |
| Main results             | 16  | (a) Give unadjusted estimates and, if applicable, confounder-adjusted estimates and their precision (eg, 95% confidence interval). Make clear which confounders were adjusted for and why they were included | Tables, 11-12                        |
|                          |     | (b) Report category boundaries when continuous variables were categorized                                                                                                                                    | Tables, 7-10                         |
|                          |     | (c) If relevant, consider translating estimates of relative risk into absolute risk for a meaningful time period                                                                                             | n.a.                                 |
| Other analyses           | 17  | Report other analyses done—eg analyses of subgroups and interactions, and sensitivity analyses                                                                                                               | Tables, 12-13                        |
| <b>Discussion</b>        |     |                                                                                                                                                                                                              |                                      |
| Key results              | 18  | Summarise key results with reference to study objectives                                                                                                                                                     | 13                                   |
| Limitations              | 19  | Discuss limitations of the study, taking into account sources of potential bias or imprecision. Discuss both direction and magnitude of any potential bias                                                   | 14                                   |
| Interpretation           | 20  | Give a cautious overall interpretation of results considering objectives, limitations, multiplicity of analyses, results from similar studies, and other relevant evidence                                   | 13-14                                |
| Generalisability         | 21  | Discuss the generalisability (external validity) of the study results                                                                                                                                        | 13-14                                |
| <b>Other information</b> |     |                                                                                                                                                                                                              |                                      |
| Funding                  | 22  | Give the source of funding and the role of the funders for the present study and, if applicable, for the original study on which the present article is based                                                | 4-5                                  |

1  
2  
3 \*Give information separately for cases and controls in case-control studies and, if applicable, for exposed and  
4 unexposed groups in cohort and cross-sectional studies.  
5

6 **Note:** An Explanation and Elaboration article discusses each checklist item and gives methodological background and  
7 published examples of transparent reporting. The STROBE checklist is best used in conjunction with this article (freely  
8 available on the Web sites of PLoS Medicine at <http://www.plosmedicine.org/>, Annals of Internal Medicine at  
9 <http://www.annals.org/>, and Epidemiology at <http://www.epidem.com/>). Information on the STROBE Initiative is  
10 available at [www.strobe-statement.org](http://www.strobe-statement.org).  
11  
12  
13  
14  
15  
16  
17  
18  
19  
20  
21  
22  
23  
24  
25  
26  
27  
28  
29  
30  
31  
32  
33  
34  
35  
36  
37  
38  
39  
40  
41  
42  
43  
44  
45  
46  
47  
48  
49  
50  
51  
52  
53  
54  
55  
56  
57  
58  
59  
60

# BMJ Open

## Dog ownership, the natural outdoor environment and health: a cross-sectional study

|                                 |                                                                                                                                                                                                                                                                                                                                                                                                                                                                                                                                                                                                                                                                                                                                                                                                                                                                                                                                                                                                                                                                                                                                                                                                                                                                                                         |
|---------------------------------|---------------------------------------------------------------------------------------------------------------------------------------------------------------------------------------------------------------------------------------------------------------------------------------------------------------------------------------------------------------------------------------------------------------------------------------------------------------------------------------------------------------------------------------------------------------------------------------------------------------------------------------------------------------------------------------------------------------------------------------------------------------------------------------------------------------------------------------------------------------------------------------------------------------------------------------------------------------------------------------------------------------------------------------------------------------------------------------------------------------------------------------------------------------------------------------------------------------------------------------------------------------------------------------------------------|
| Journal:                        | <i>BMJ Open</i>                                                                                                                                                                                                                                                                                                                                                                                                                                                                                                                                                                                                                                                                                                                                                                                                                                                                                                                                                                                                                                                                                                                                                                                                                                                                                         |
| Manuscript ID                   | bmjopen-2018-023000.R3                                                                                                                                                                                                                                                                                                                                                                                                                                                                                                                                                                                                                                                                                                                                                                                                                                                                                                                                                                                                                                                                                                                                                                                                                                                                                  |
| Article Type:                   | Research                                                                                                                                                                                                                                                                                                                                                                                                                                                                                                                                                                                                                                                                                                                                                                                                                                                                                                                                                                                                                                                                                                                                                                                                                                                                                                |
| Date Submitted by the Author:   | 12-Mar-2019                                                                                                                                                                                                                                                                                                                                                                                                                                                                                                                                                                                                                                                                                                                                                                                                                                                                                                                                                                                                                                                                                                                                                                                                                                                                                             |
| Complete List of Authors:       | Zijlema, Wilma; Instituto de Salud Global Barcelona, Christian, Hayley; The University of Western Australia, School of Population Health<br>Triguero-Mas, Margarita; Instituto de Salud Global Barcelona<br>Cirach, Marta; Instituto de Salud Global Barcelona<br>van den Berg, Magdalena; EMGO Institute for Health and Care Research, VU University Medical Center<br>Maas, Jolanda; Vrije Universiteit Amsterdam, Department of Clinical Psychology<br>Gidlow, Christopher; Staffordshire University, Centre for Sport, Health and Exercise Research<br>Kruize, Hanneke; National Institute for Public Health and the Environment,, Centre of Environmental Health Research<br>Wendel-Vos, Wanda; National Institute for Public Health and the Environment,<br>Andrušaitytė, Sandra; 7. Department of Environmental Sciences, Vytautas Magnus University, Kaunas, Lithuania<br>Grazuleviciene, Regina; Vytauto Didziojo Universitetas, Department of Environmental Sciences<br>Litt, Jill; University of Colorado Boulder, Environmental Studies Program<br>Nieuwenhuijsen, Mark; Instituto de Salud Global de Barcelona (ISGlobal), Centre for International Health Research (CRESIB); Instituto de Salud Global de Barcelona (ISGlobal), Centre for Research in Environmental Epidemiology (CREAL) |
| <b>Primary Subject Heading</b>: | Epidemiology                                                                                                                                                                                                                                                                                                                                                                                                                                                                                                                                                                                                                                                                                                                                                                                                                                                                                                                                                                                                                                                                                                                                                                                                                                                                                            |
| Secondary Subject Heading:      | Public health                                                                                                                                                                                                                                                                                                                                                                                                                                                                                                                                                                                                                                                                                                                                                                                                                                                                                                                                                                                                                                                                                                                                                                                                                                                                                           |
| Keywords:                       | EPIDEMIOLOGY, PUBLIC HEALTH, MENTAL HEALTH                                                                                                                                                                                                                                                                                                                                                                                                                                                                                                                                                                                                                                                                                                                                                                                                                                                                                                                                                                                                                                                                                                                                                                                                                                                              |
|                                 |                                                                                                                                                                                                                                                                                                                                                                                                                                                                                                                                                                                                                                                                                                                                                                                                                                                                                                                                                                                                                                                                                                                                                                                                                                                                                                         |

SCHOLARONE™  
Manuscripts

1  
2  
3 Title4  
5 Dog ownership, the natural outdoor environment and health: a cross-sectional study  
67  
8 Authors9  
10 Wilma L Zijlema<sup>abc\*</sup>, Hayley Christian<sup>d</sup>, Margarita Triguero-Mas<sup>abc</sup>, Marta Cirach<sup>abc</sup>, Magdalena van den  
11 Berg<sup>e</sup>, Jolanda Maas<sup>f</sup>, Christopher Gidlow<sup>g</sup>, Hanneke Kruize<sup>h</sup>, Wanda Wendel-Vos<sup>i</sup>, Sandra Andrusaityte<sup>j</sup>,  
12 Regina Grazuleviciene<sup>j</sup>, Jill Litt<sup>h</sup>, Mark J. Nieuwenhuijsen<sup>abc</sup>  
13  
1415  
16 Affiliations17  
18  
19  
20 <sup>a</sup> Barcelona Institute for Global Health (ISGlobal), Doctor Aiguader 88, 08003 Barcelona, Spain21  
22 <sup>b</sup> Universitat Pompeu Fabra (UPF), Doctor Aiguader 88, 08003 Barcelona, Spain23  
24  
25 <sup>c</sup> CIBER Epidemiología y Salud Pública (CIBERESP), Melchor Fernández Almagro, 3-5, 28029 Madrid,  
26 Spain  
2728  
29  
30 <sup>d</sup> School of Population and Global Health, The University of Western Australia, 35 Stirling Highway,  
31 Crawley, 6009, Perth, Australia  
3233  
34  
35 <sup>e</sup> Department of Public & Occupational Health and EMGO Institute for Health and Care research, VU  
36 University Medical Center, Amsterdam, the Netherlands  
3738  
39  
40 <sup>f</sup> Department of Clinical Psychology, Vrije Universiteit Amsterdam, Van der Boechorstraat 1, 1081 BT  
41 Amsterdam, Netherlands  
4243  
44  
45 <sup>g</sup> Centre for Health and Development, Staffordshire University, Leek Road, Stoke-on-Trent, ST4 7EP,  
46 United Kingdom  
4748  
49  
50 <sup>h</sup> Center for Sustainability, Environment and Health, National Institute for Public Health and the  
51 Environment (RIVM), Antonie van Leeuwenhoeklaan 9, 3721 MA Bilthoven, The Netherlands  
5253  
54  
55 <sup>i</sup> Centre for Nutrition, Prevention and Health Services, National Institute for Public Health and the  
56 Environment (RIVM), Antonie van Leeuwenhoeklaan 9, 3721 MA Bilthoven, The Netherlands  
57  
58  
59  
60

1  
2  
3 <sup>j</sup> Department of Environmental Sciences, Vytautas Magnus University, K. Donelaicio str. 58, 44248  
4  
5 Kaunas, Lithuania  
6

7  
8 <sup>h</sup> Environmental Studies Program, University of Colorado Boulder, 4001 Discovery Drive, Boulder, CO  
9  
10 80303, United States.  
11

12  
13  
14  
15 \*Corresponding author

16  
17 Wilma L Zijlema PhD

18  
19 Barcelona Institute for Global Health (ISGlobal)

20  
21 Barcelona Biomedical Research Park (PRBB)

22  
23 Doctor Aiguader 88, 08003 Barcelona, Spain

24  
25 Tel: +34 932147300, Fax: +34 93 214 73 02, E-mail: [wilma.zijlema@isglobal.org](mailto:wilma.zijlema@isglobal.org)  
26  
27  
28  
29  
30  
31  
32  
33  
34  
35  
36  
37  
38  
39  
40  
41  
42  
43  
44  
45  
46  
47  
48  
49  
50  
51  
52  
53  
54  
55  
56  
57  
58  
59  
60

## Abstract

### Objectives

Dog owners walking their dog in natural outdoor environments (NOE) may benefit from the physical activity facilitated by dog walking and from time spent in nature. However, it is unclear whether dog owners receive additional health benefits associated with having access to NOE above the physical activity benefit of walking with their dog. We investigated associations between dog ownership, walking, time spent in NOE, and health and whether these associations differed among those with good and poor access to NOE and those living in green and less green areas.

### Design

Cross-sectional study

### Setting

The Positive Health Effects of the Natural Outdoor Environment in Typical Populations in Different Regions in Europe (PHENOTYPE) project.

### Participants

n=3586 adults from Barcelona (Spain), Doetinchem (the Netherlands), Kaunas (Lithuania), and Stoke-on-Trent (United Kingdom).

### Data collection and analysis

We calculated access to NOE with land maps and residential surrounding greenness with satellite data. Leisure time walking, time spent in NOE, and general and mental health status were measured using validated questionnaires. Associations were estimated using multilevel analysis with a random intercept defined at the neighborhood level.

### Results

Dog ownership was associated with higher rates of leisure time walking and time spending in NOE (odds ratio 2.17, 95% CI 1.86, 2.54 and 2.37, 95% CI 2.02, 2.79 respectively). These associations were stronger



1  
2  
3 in those living within 300m of a NOE and in greener areas. No consistent associations were found  
4  
5 between dog ownership and perceived general or mental health status.  
6

## 7 8 Conclusions

9  
10 Compared with non-dog owners, dog owners walked more and spent more time in NOE, especially those  
11  
12 living within 300m of a NOE and in greener areas. The health implications of these relationships should  
13  
14 be further investigated. In a largely physically inactive society, dog walking in NOE may be a simple way  
15  
16 of promoting physical activity and health.  
17

## 18 19 Strengths and limitations of this study

- 20  
21  
22
- 23 • This is one of the first studies from mainland Europe, and the multi-city approach revealed  
24 differences between cities concerning dog ownership and health.  
25
  - 26 • The assessment of access to natural outdoor environments suitable for physical activity using  
27 road network buffers was chosen to optimally capture the relation with people's walking  
28 behavior.  
29
  - 30 • The use of multiple exposure indicators of natural outdoor environments enabled studying these  
31 exposure indicators simultaneously, and could help understand what metric best predicts the  
32 health benefits associated with natural outdoor environments.  
33
  - 34 • We cannot establish the direction of the observed relationships because of the cross-sectional  
35 study design.  
36
  - 37 • We had no detailed information about dog ownership (e.g. level of attachment, duration of dog  
38 ownership, primary caretaker) and we did not know if the time spent in natural outdoor  
39 environments and leisure time walking was undertaken together with the dog.  
40  
41  
42  
43  
44  
45  
46  
47  
48  
49  
50  
51  
52  
53  
54

## 55 Competing interests

56  
57  
58 None declared  
59  
60

### Funding

This work was supported by the European Community's Seventh Framework Programme (FP7/2007-2013) under grant agreement no 282996. W.L. Zijlema is supported by a Sara Borrell grant from the Instituto de Salud Carlos III (CD17/00195). H. Christian is supported by an Australian National Heart Foundation Future Leader Fellowship (#100794). ISGlobal is a member of the CERCA Programme, Generalitat de Catalunya. The funders had no role in study design, data collection and analysis, decision to publish, or preparation of the manuscript.

### Author's Contributions

WLZ conducted the analyses. WLZ, HC and JL drafted the manuscript. MTM, MC, MB, JM, CG, HK, WWV, SA, RG, MJN were involved in the design of and data acquisition in the PHENOTYPE study. All authors provided input on the manuscript and agreed with the final version.

### Acknowledgements

The authors thank Sandra Márquez and Xavier Basagaña for their valuable advice in the statistical analyses and the PHENOTYPE respondents for their contribution.

### Data sharing statement

Additional data are available upon request from the corresponding author (WLZ:

[Wilma.zijlema@isglobal.org](mailto:Wilma.zijlema@isglobal.org)).

## INTRODUCTION

In an urbanized world, where people spend the majority of their time indoors [1], physical inactivity is a major public health problem [2]. It not only leads to adverse health effects but it is also a large economic burden for society [3]. Physical activity behavior is influenced by many factors. Apart from individual-level factors including age, sex, and health status, the built environment is an important determinant of physical activity [4,5]. Aspects of the built environment such as the availability of parks are associated with increased physical activity, especially walking [6,7]. It is important to identify sustainable built environment interventions for increasing physical activity and improving health.

Promotion of walking could be a population-level strategy to address physical inactivity. As such, and considering the prevalence of dog ownership (e.g. 18% in the Netherlands [8]), dog walking has been identified as a simple way of promoting physical activity [9–12]. There is strong evidence to suggest that dog owners walk more often and are more physically active than non-dog owners [12–14]. This association has been observed in adults [15,16], adolescents and children [17–19], in groups with potential limited mobility such as older adults [20–22] and in people with a chronic disease [23]. Consequently, dog walking may lead to better health over time, with benefits ranging from improved wellbeing [24] to fewer doctor visits [25] and a lower risk of cardiovascular disease and mortality [26].

However, not all studies show health benefits of dog ownership [27–29] and a large proportion of dog owners do not walk their dog [30,31]. Of the various factors that influence dog walking behavior, aspects of the built environment seem to be among them [11]. Supportive environments, such as neighborhoods with parks and other types of green infrastructure, are associated with higher physical activity levels of dog owners and are important for promoting dog walking [10,11,32]. Specifically, better park access and park quality (e.g. presence of dog litter bags, water sources) were related to dog walking [11,33,34]. Not all dog owners have access to parks thus improving access to parks in residential areas could be important for facilitating dog walking, especially since local parks are a common place for dog walking [35]. Parks also provide an opportunity for nature contact. Spending time in natural outdoor environments (NOE), such as parks, has been associated with health benefits, for example through facilitating stress reduction, restoration, and social contact [36–38]. Dog owners walking their dog in NOE may benefit from the physical activity facilitated by owning a dog as well as time spent in nature. However, it is unclear whether dog owners receive additional health benefits associated with having access to NOE. According to the theories of health behavior [39] and the social ecological framework [40], identifying the environmental

1  
2  
3 factors that influence health outcomes (e.g. access to NOE) could lead to potential intervention strategies  
4  
5 that could eventually improve health.  
6

7  
8 The aim of this study was to investigate the relationships between dog ownership, walking, the NOE and  
9  
10 health. In line with above-mentioned studies and health behavior theories, we hypothesized that dog owners  
11  
12 walk more, spend more time in NOE and are healthier than non-dog owners, and that the health benefits  
13  
14 are more apparent in dog owners within green neighborhoods and with access to NOE compared to those  
15  
16 in less green areas and with poor NOE access. We therefore investigated the associations between dog  
17  
18 ownership, leisure time walking, time spent in NOE, and general and mental health status, and whether  
19  
20 these associations differed among those with good and poor access to NOE and those living in green and  
21  
22 less green areas.  
23

## 24 METHOD

### 25 26 Study design and participants 27

28  
29 This study analyzed data from the Positive Health Effects of the Natural Outdoor environment in Typical  
30  
31 Populations in different regions in Europe (PHENOTYPE) project. Respondents were recruited from 30  
32  
33 different neighborhoods in Barcelona (Spain), Doetinchem (the Netherlands), Kaunas (Lithuania), and  
34  
35 Stoke-on-Trent (United Kingdom) [41,42]. Neighborhoods were selected to maximize variability in access  
36  
37 to NOE and socioeconomic status. In order to arrive at a final sample of approximately 1000 respondents  
38  
39 per city, a random sample of 30 to 35 addresses per neighborhood were mailed with a letter explaining the  
40  
41 purpose of the project after which they were visited by interviewers. In Doetinchem, persons were asked to  
42  
43 send back an answer card to indicate their willingness to participate before they were visited by the  
44  
45 interviewers; and in Kaunas, persons were approached by mail to fill out postal questionnaires. Respondents  
46  
47 needed to have an age between 18 and 75 years and to be able to speak the local language. Data were  
48  
49 collected using interview-administered questionnaires (except in Kaunas, where self-administered  
50  
51 questionnaires were used) at respondents' residences during May-November 2013. The study was  
52  
53 conducted in accordance with the Declaration of Helsinki. All respondents provided written informed  
54  
55 consent and study protocols were approved by local ethical committees (Parc de Salut Mar, Clinical  
56  
57 Research Ethics Committee reference number 2011/4206/I; Medisch Ethische Toestingscommissie UMCU  
58  
59 reference number 12/595; Lietuvos Bioetikos Komitetas reference number 6B-12-147; Faculty of Health  
60  
61 Sciences' Ethics Panel, no reference number).

## Patient and Public Involvement

Participant and stakeholder involvement and dissemination of results was organized in multiple ways through symposia, workshops, online media channels and newsletters. Members of the public were not directly involved in the design or conception of the study.

## Data

### Explanatory variables

#### Dog ownership

Dog ownership was assessed using the question: “Do you own a dog” (yes; no).

*Access to NOE* was estimated with land use maps from local sources in each city (details in [42]). Only NOE that were publically available; suitable for physical activity; and at least 0.5 hectare (e.g. parks, semi-natural/natural land, formal recreation grounds) or 0.25 hectare (natural/green corridors) were selected as these were relevant for physical activity [42] and therefore potentially relevant in terms of the health benefits of NOE for dog owners. Road network buffers were chosen over circular buffers in order to capture a more realistic measure of NOE accessibility on foot [43], which may be most relevant to dog walking. We furthermore used three predetermined buffer sizes to obtain a better understanding of what distance to NOE is most beneficial to health [44]. Using GIS we constructed three indicators: (1) the number of, and (2) the total surface area NOE within road network buffers of 300m, 500m, and 1000m, and (3) the road network distance to the nearest NOE (Figure 1). The number of and area of NOE were dichotomized using the city-specific median values. Distance to nearest NOE was dichotomized using a 300m cut off according to guidelines [45].

*Residential surrounding greenness* was assessed using the normalized difference vegetation index (NDVI). The NDVI is a measure of vegetation and represents the photosynthetic activity in an area [42,46]. Healthy vegetation absorbs most visible light and reflects large parts of near-infrared light, while sparse vegetation reflects more visible light and less near-infrared light. Based on this distinction a value between -1 and +1 is calculated, with higher values indicating a higher density of green vegetation [46]. The NDVI was derived from Landsat 5 and 8 satellite images at a resolution of 30 m × 30 m on cloud-free images within the greenest season (April to September) in the relevant period for this study (2011-2013). Average NDVI

1  
2  
3 values were calculated within (Euclidean) buffers of 100m, 300m, and 500m around the residence, as used  
4  
5 in previous research [47,48], and dichotomized using the city-specific median value.  
6  
7

8  
9 (Figure 1 here)

10  
11 Figure 1. Example of different buffer types and the distance to natural outdoor environments from a  
12  
13 residential address.  
14

15  
16 Outcome variables

17  
18  
19 Leisure time walking

20  
21 Walking in leisure time was assessed by the following questions: “When thinking about a normal week in  
22  
23 the past month how many days per week do you walk in your leisure time” and “How much time (minutes)  
24  
25 per day do you spend walking in your leisure time”. These items were derived from the short questionnaire  
26  
27 to assess health-enhancing physical activity (SQUASH) [49]. The SQUASH is a valid measure of physical  
28  
29 activity [49,50]. Duration and frequency of walking was multiplied to create a composite variable of  
30  
31 minutes per week of leisure time walking. This composite variable was then dichotomized using the median  
32  
33 (120 minutes/week) as a cut point. City-specific cut points were made for city-specific analyses (Barcelona:  
34  
35 120 min/week; Doetinchem: 120 min/week; Kaunas: 240 min/week; and Stoke-on-Trent: 20 min/week).  
36

37  
38 Time spent in NOE

39  
40 NOE were defined as all public and private outdoor spaces that contain ‘green’ and/or ‘blue’ natural  
41  
42 elements such as street trees, forests, city parks and natural parks/reserves, and also included all types of  
43  
44 waterbodies such as canals, ponds, creeks, rivers, beaches. Time spent in NOE was assessed using two  
45  
46 questions: “How often did you visit/go in the last 4 weeks on purpose to green or blue space near your  
47  
48 home?” (5-point response scale ranging from ‘never’ (1) to ‘almost daily’ (5)); and “How much time did  
49  
50 you spend in a green or blue space near your home?” (4-point response scale ranging from <1 h (1) to 6–  
51  
52 10 h (4)). A composite variable was created to determine the amount of time (frequency of visits multiplied  
53  
54 by average duration per visit) respondents spent in NOE near home per month. As frequency and duration  
55  
56 were assessed with questions with categorical response scales, the central value of each answer category  
57  
58 for frequency were multiplied with central value of each answer category for duration (e.g. 3-5 h/month  
59  
60 was coded as 4 h/month). The composite variable was then dichotomized using the median (4 hours/month)

1  
2  
3 as a cut point. City-specific cut points were made for city-specific analyses (Barcelona: 3.75 h/month;  
4  
5 Doetinchem: 10 h/month; Kaunas: 4 h/month; and Stoke-on-Trent: 1 h/month).

#### 6 7 8 General health status

9  
10 General health status was assessed using the question: “In general what would you say your health is?” (5  
11  
12 point response scale: excellent to poor), which was derived from the Medical Outcome Study Short Form  
13  
14 (SF-36) [51]. Scores were dichotomized into “fair or poor” (0) and “excellent, very good, and good” (1).  
15  
16 This single question has been found to be associated with poor health outcomes in the general population  
17  
18 [52,53].

#### 19 20 21 Mental health

22  
23 Mental health was assessed using the Short Form Health Survey (SF-36) mental health subscale, including  
24  
25 five items (e.g. nervousness, depression), and is a valid and reliable measure of mental health [54].  
26  
27 Respondents rated the occurrence of symptoms in the past four weeks on a 6-point scale ranging from “all  
28  
29 of the time” (1) to “none of the time” (6). A sum score was calculated and transformed into a scale ranging  
30  
31 from 0 to 100 according to guidelines [51] with higher scores indicating better mental health. When  $\geq 3$   
32  
33 items were missing, respondents were excluded from the analyses, but when 1-2 items were missing,  
34  
35 missing values were replaced by the average score of the other items. We did this for 17 respondents.  
36  
37 Analyses including and excluding these 17 respondents did not alter the results.

#### 38 39 40 Covariates and other variables

41  
42 Information about sociodemographic factors included sex, age, educational level (primary school or no  
43  
44 education; secondary school/ further education (up to 18 years); university degree or higher), household  
45  
46 composition (alone; with partner (without children); with children <12 yr old; with children >12 yr old; and  
47  
48 other), perceived income situation (cannot make ends meet; enough to get by; comfortable), frequency of  
49  
50 contact with family and/or friends ((almost daily;  $\geq 1$  per week; 1-3 per month or less), and whether  
51  
52 respondents feel part of a group of friends ((totally) agree; neutral, (totally) disagree). We also included  
53  
54 perceived safety of neighborhood NOE (very satisfied; satisfied; neutral; dissatisfied; very dissatisfied).  
55  
56 Health-related factors included disability restricting mobility (yes; no), one or more chronic diseases (yes;  
57  
58 no), body mass index (based on self reported height and weight: healthy weight  $\leq 25$  kg/m<sup>2</sup>; overweight 25-  
59  
60 30 kg/m<sup>2</sup>; obese >30 kg/m<sup>2</sup>), and smoking status (current; former; never). Neighborhood socioeconomic

1  
2  
3 status (SES, low; intermediate; high) was based on country-specific data (Barcelona: deprivation index  
4 based on census data 2001 [55]; Doetinchem: average monthly household income per 6-digit zip code  
5 level [56]; Kaunas: neighborhood education level [57]; Stoke-on-Trent: English indices of deprivation 2010  
6 [58]).  
7  
8  
9

#### 10 11 12 13 14 Statistical analyses 15

16  
17 Equivalence tests with Benjamini-Hochberg adjustments for false discovery rates (5%) [59] were used to  
18 test for differences between dog owner and non-dog owner characteristics. To investigate the association  
19 between dog ownership, and outcomes leisure time walking, time spent in NOE, and general and mental  
20 health status, and whether these associations differed for respondents with good/poor access to NOE and  
21 high/low residential surrounding greenness, we investigated:  
22  
23  
24  
25

- 26  
27 1. The associations between dog ownership, and outcomes leisure time walking, time spent in NOE,  
28 general health status, and mental health.  
29
- 30  
31 2. The associations specified at 1, stratified by NOE access (good and poor) and by residential  
32 surrounding greenness (high and low) to investigate whether the associations between dog  
33 ownership and the outcomes differ in these subgroups.  
34  
35  
36  
37

38 Associations were estimated using multilevel analysis with a random intercept defined at the neighborhood  
39 level. Associations with leisure time walking, time spent in NOE and general health status were estimated  
40 with logistic regression because of the dichotomization of the data; and since mental health scores were  
41 normally distributed, associations were estimated with linear regression. Models were adjusted for age, sex,  
42 education level, household composition, perceived income situation, neighborhood SES, NOE safety,  
43 disability restricting mobility, and chronic diseases and were selected because of an assumed relation with  
44 dog ownership, walking, time spent in NOE and health. The main associations (as specified at 1) were also  
45 estimated for the cities separately. Stratified analyses by access to NOE and residential surrounding  
46 greenness were undertaken with indicators in all buffer sizes, but the 500m buffer was reported in the main  
47 table and the remaining buffer sizes in the Supplement. Analyses were based on complete cases (missing  
48 data differed by outcome and ranged between n=360 and 416). All analyses were performed in STATA  
49 14.2 [60].  
50  
51  
52  
53  
54  
55  
56  
57  
58  
59  
60



1  
2  
3 Sensitivity analyses were undertaken to investigate whether additional adjustment for covariates changed  
4 the associations. Additional adjustments were carried out for characteristics that were found to differ  
5 between dog owners and non-dog owners and that may relate to health (smoking and BMI), or that have  
6 been found to be mediators of the dog ownership-health relationship (frequency of contact with family  
7 and/or friends, and whether respondents feel part of a group of friends) [61,62].  
8  
9  
10  
11  
12  
13  
14  
15  
16  
17  
18  
19  
20  
21  
22  
23  
24  
25  
26  
27  
28  
29  
30  
31  
32  
33  
34  
35  
36  
37  
38  
39  
40  
41  
42  
43  
44  
45  
46  
47  
48  
49  
50  
51  
52  
53  
54  
55  
56  
57  
58  
59  
60

For peer review only

## RESULTS

### Population characteristics

Respondents were on average 51.4 (SD 15.9) years old and 54.9% were female. A total of 1109 (30.9%) respondents were dog owners. Dog owners compared with non-dog owners were on average the same age, had similar educational attainment but more were female (59.6% vs. 53.3%) and reported lower perceived income security. Dog ownership varied across cities, with it being highest in Kaunas (41.1%) and lowest in Doetinchem (16.5%). Dog owners walked more and spent more time in NOE compared with non-dog owners. However, dog owners had a lower perceived general and mental health status compared with non-dog owners. Dog owners also reported more frequently that physical constraints restricted their mobility, had more often a chronic disease, and had higher BMI than non-dog owners (Table 1).

(Table 1 here)

### Dog ownership, leisure time walking, time spent in NOE and health

Adjusted multilevel models showed that dog ownership was associated with increased odds of walking  $\geq 121$  minutes per week (i.e. higher than the median amount of walking) (odds ratio [OR]= 2.17, 95% CI 1.86, 2.54) compared with non-dog owners. Dog ownership was also associated with increased odds of spending  $\geq 4$  hours/month in NOE (i.e. higher than the median amount of time in NOE) (OR= 2.37, 95% CI 2.02, 2.79) compared with non-dog owners. There were no differences in perceived general health status and mental health between dog owners and non-dog owners. City-specific analyses showed similar results, with some exceptions: a positive association between dog ownership and perceived general health in Barcelona (OR=1.90, 95% CI 1.01, 3.56); and a positive association between dog ownership and mental health in Stoke-on-Trent ( $\beta$ = 2.61, 95% CI 0.35, 4.86) (Table 2 and Supplemental Table S1).

(Table 2 here)

### Stratified analyses by access to NOE and residential surrounding greenness

Generally, stratified analyses showed that the associations between dog ownership and leisure time walking by number and area of NOE were similar. The odds ratio for dog ownership and leisure time walking was larger for those living within 300m of a NOE (OR= 2.36, 95% CI 1.97, 2.83) compared to those living within >300m of a NOE (OR= 1.86, 95% CI 1.36, 2.55; Table 3). Similar results were observed for those

1  
2  
3 with a high amount of residential surrounding greenness (100 and 300m buffer, Supplemental Table S2)  
4  
5 compared to low residential surrounding greenness.  
6

7  
8 The associations between dog ownership and time spent in NOE were larger for those with a lower number  
9  
10 or area of NOE than for those with a higher number or area of NOE (Table 3 and Supplemental Table S2).  
11  
12 We observed a larger odds ratio for the association between dog ownership and time spent in NOE for those  
13  
14 living within 300m of a NOE (OR= 2.64, 95% CI 2.18, 3.20) compared to those living within >300m of a  
15  
16 NOE (OR= 1.82, 95% CI 1.31, 2.55; Table 3). A larger odds ratio for the association between dog  
17  
18 ownership and time spent in NOE for those with more residential surrounding greenness were consistent  
19  
20 across buffer sizes 300m and 500m, but not for residential surrounding greenness within 100m (Table 3  
21  
22 and Supplemental Table S2).  
23

24  
25 There were no statistically significant associations between dog ownership and perceived general health  
26  
27 status when stratifying by access to NOE or residential surrounding greenness. Similarly, there was no  
28  
29 indication for an association between dog ownership and mental health in groups with high or low access  
30  
31 to NOE and with high or low residential surrounding greenness (Table 3).  
32

33 (Table 3 here)  
34  
35  
36  
37

38 Sensitivity analysis  
39

40  
41 Additional adjustments for smoking, BMI, frequency of contact with family and/or friends, and whether  
42  
43 respondents feel part of a group of friends, did not change the results (results available upon request).  
44  
45  
46  
47

## 48 DISCUSSION 49

50  
51 Having a dog was associated with more leisure time walking and time spent in NOE near home compared  
52  
53 with not having a dog. Moreover, the differences in walking and time spent in NOE between dog owners  
54  
55 and non-dog owners were larger when there was a NOE within 300m of the residence, and a high amount  
56  
57 of residential surrounding greenness. There was no consistent evidence for an association between dog  
58  
59 ownership and perceived general and mental health status. Only dog owners from Stoke-on-Trent had better  
60

1  
2  
3 mental health compared with non-dog owners, and dog owners from Barcelona had better perceived general  
4 health compared to non-dog owners.  
5

6  
7 Prior studies have also observed links between NOE, dog ownership and physical activity. In support of  
8 our findings, a UK study of older adults reported that neighborhood greenness was associated with a smaller  
9 decline in physical activity over time, and that dog walking explained up to 50% of the variance in the  
10 relationship between greenness and outdoor physical activity [63]. Our findings were also consistent with  
11 a Danish study that found that dog ownership was a major determinant of park visits, especially those parks  
12 closest to the residence [35]. Our study adds to the evidence base by including multiple exposure indicators  
13 of NOE which enabled studying multiple exposure indicators of NOE simultaneously, and could help  
14 understand what metric best predicts the health benefits associated with NOE [36,37,41]. We found that  
15 dog owners spent more time in NOE than non-dog owners, but dog ownership was not consistently related  
16 to perceived mental or general health status. Dog ownership was only related to better perceived general or  
17 mental health in Barcelona and Stoke-on-Trent, the two cities where respondents were the least active and  
18 spent the least time in NOE. This suggests that the health benefits of dog ownership exist when walking  
19 and time spent in NOE is low to begin with. Because we found no consistent evidence for health benefits  
20 for dog owners with better availability of NOE, future studies could also investigate subjective indicators  
21 of NOE, including satisfaction and importance, and neighborhood aesthetics [64].  
22  
23  
24  
25  
26  
27  
28  
29  
30  
31  
32  
33  
34  
35  
36

37 Although the cross-sectional nature of our study does not allow for understanding the longitudinal effects  
38 of dog ownership on health, it is possible that people with physical constraints and chronic diseases more  
39 often decide to have a dog, for example following doctor's advice, in order to stay mobile [26]. Similarly,  
40 another study reported that dog owners more often had asthma, and a higher BMI compared with non-dog  
41 owners [28]. Furthermore, an Australian study found that although pet ownership was associated with  
42 higher levels of physical activity, it was also associated with higher self-reported BMI, higher diastolic  
43 blood pressure, and smoking [27]. We found that despite the physical constraints and chronic diseases, dog  
44 owners engaged in more leisure time walking than non-dog owners. We hypothesize that the extra physical  
45 activity facilitated by dog walking may offset some of the other negative health risk factors dog owners  
46 have, and could eventually yield longer term health benefits. This may especially occur in green  
47 neighborhoods, when there is access to NOE and when the residential environment promotes walking.  
48  
49  
50  
51  
52  
53  
54  
55  
56  
57  
58  
59  
60

1  
2  
3 Limitations of this study include the lack of information about the dog (e.g. breed, age, temperament), the  
4 dog owner's level of attachment to their dog, the duration of dog ownership, and if the respondent was the  
5 primary carer of the dog. Such factors may have influenced the potential health benefits of dog ownership,  
6 but we were unable to take these factors into account. We further did not know if the time spent in NOE  
7 and leisure time walking was undertaken together with the dog, and whether time spent in NOE was time  
8 spent walking. Future research should measure specific aspects of dog ownership and should use measures  
9 of behavior such as time spent in NOE with and without dog and leisure time walking undertaken with and  
10 without the dog. A limitation of self-reporting walking habits is potential overstatement of the amount of  
11 walking. Minutes of walking and time in NOE were dichotomized because of non-normal distributions and  
12 although this resulted in easier interpretation of data, it also resulted in information loss. Although data  
13 collection was similar in each city, data on neighborhood SES was based on country-specific data and this  
14 might have complicated comparisons between cities. Finally, we cannot establish the direction of the  
15 observed relationships because of the cross-sectional study design. For example, people who are already  
16 physically active and visit NOE may decide to get a dog, instead of dogs motivating their owners to walk  
17 and visit NOE more. Strengths include the multi-city approach, which revealed differences between cities  
18 concerning dog ownership and health. It is also one of the first studies from mainland Europe, since the  
19 majority of research has been carried out in North America, Australia, and in the UK. More international  
20 studies about dog ownership and health are needed. Finally, our measure of access to NOE was specific to  
21 environments that were suitable for physical activity. Also, for access to NOE, we used road network  
22 buffers over circular buffers which better capture people's walking behavior; and we used varying buffer  
23 sizes to obtain a better understanding of what distance to NOE is most beneficial to health [44].

## 24 Conclusions

25  
26 Dog owners performed more leisure time walking and spent more time in NOE compared with non-dog  
27 owners, especially when they lived within 300m of a NOE and when they lived in green areas. There was  
28 no consistent relationship between dog ownership and better perceived general or mental health status. In  
29 a largely physically inactive society where many people remain indoors, dog walking in parks or other NOE  
30 may be an opportunity to engage people in walking behavior as a path towards better health. Cities should  
31 therefore ensure that there is access to NOE for dog owners and provide green infrastructure in order to  
32 promote dog walking. Future research should focus on natural experiments and evaluation of intervention  
33 strategies to increase dog owners' access to NOE.

## REFERENCES

- 1 Schweizer C, Edwards RD, Bayer-Oglesby L, *et al*. Indoor time–microenvironment–activity patterns in seven regions of Europe. *J Expo Sci Environ Epidemiol* 2007;**17**:170–81. doi:10.1038/sj.jes.7500490
- 2 Hallal PC, Andersen LB, Bull FC, *et al*. Global physical activity levels: Surveillance progress, pitfalls, and prospects. *Lancet* 2012;**380**:247–57. doi:10.1016/S0140-6736(12)60646-1
- 3 Ding D, Lawson KD, Kolbe-Alexander TL, *et al*. The economic burden of physical inactivity: a global analysis of major non-communicable diseases. *Lancet* 2016;**388**:1311–24. doi:10.1016/S0140-6736(16)30383-X
- 4 McCormack GR, Shiell A. In search of causality: a systematic review of the relationship between the built environment and physical activity among adults. *Int J Behav Nutr Phys Act* 2011;**8**:125. doi:10.1186/1479-5868-8-125
- 5 Bauman AE, Reis RS, Sallis JF, *et al*. Correlates of physical activity: why are some people physically active and others not? *Lancet (London, England)* 2012;**380**:258–71. doi:10.1016/S0140-6736(12)60735-1
- 6 Sallis JF, Cerin E, Conway TL, *et al*. Physical activity in relation to urban environments in 14 cities worldwide: a cross-sectional study. *Lancet* 2016;**387**:2207–17. doi:10.1016/S0140-6736(15)01284-2
- 7 Schipperijn J, Cerin E, Adams MA, *et al*. Access to parks and physical activity: An eight country comparison. *Urban For Urban Green* 2017;**27**:253–63. doi:10.1016/j.ufug.2017.08.010
- 8 van Heijst B, de Kort M, Overgaauw P, *et al*. Rapport Feiten en Cijfers Gezelschapsdierensector 2015. 2015. <https://www.rijksoverheid.nl/documenten/rapporten/2015/11/03/feiten-cijfers-gezelschapsdierensector-2015>
- 9 Lail P, McCormack GR, Rock M, *et al*. Does dog-ownership influence seasonal patterns of neighbourhood-based walking among adults? A longitudinal study. *BMC Public Health*

- 2011;**11**:148. doi:10.1186/1471-2458-11-148
- 10 Cutt H, Giles-Corti B, Knuiiman M, *et al.* Dog ownership, health and physical activity: A critical review of the literature. *Health Place* 2007;**13**:261–72. doi:10.1016/j.healthplace.2006.01.003
- 11 Westgarth C, Christley RM, Christian HE, *et al.* How might we increase physical activity through dog walking?: A comprehensive review of dog walking correlates. *Int J Behav Nutr Phys Act* 2014;**11**:83. doi:10.1186/1479-5868-11-83
- 12 Christian H, Bauman A, Epping JN, *et al.* Encouraging Dog Walking for Health Promotion and Disease Prevention. *Am J Lifestyle Med* 2018;**12**:233–43. doi:10.1177/1559827616643686
- 13 Christian HE, Westgarth C, Bauman A, *et al.* Dog ownership and physical activity: a review of the evidence. *J Phys Act Health* 2013;**10**:750–9. <http://www.ncbi.nlm.nih.gov/pubmed/23006510> (accessed 11 Aug2017).
- 14 Toohey AM, Rock MJ. Unleashing their potential: a critical realist scoping review of the influence of dogs on physical activity for dog-owners and non-owners. *Int J Behav Nutr Phys Act* 2011;**8**:46. doi:10.1186/1479-5868-8-46
- 15 Hoerster KD, Mayer JA, Sallis JF, *et al.* Dog walking: Its association with physical activity guideline adherence and its correlates. *Prev Med (Baltim)* 2011;**52**:33–8. doi:10.1016/j.ypmed.2010.10.011
- 16 Coleman KJ, Rosenberg DE, Conway TL, *et al.* Physical activity, weight status, and neighborhood characteristics of dog walkers. *Prev Med (Baltim)* 2008;**47**:309–12. doi:10.1016/j.ypmed.2008.05.007
- 17 Westgarth C, Boddy LM, Stratton G, *et al.* A cross-sectional study of frequency and factors associated with dog walking in 9–10 year old children in Liverpool, UK. *BMC Public Health* 2013;**13**:822. doi:10.1186/1471-2458-13-822
- 18 Christian H, Trapp G, Lauritsen C, *et al.* Understanding the relationship between dog ownership and children’s physical activity and sedentary behaviour. *Pediatr Obes* 2013;**8**:392–403. doi:10.1111/j.2047-6310.2012.00113.x

- 1  
2  
3 19 Sirard JR, Patnode CD, Hearst MO, *et al.* Dog Ownership and Adolescent Physical Activity. *Am*  
4 *J Prev Med* 2011;**40**:334–7. doi:10.1016/j.amepre.2010.11.007  
5  
6  
7  
8 20 Shibata A, Oka K, Inoue S, *et al.* Physical Activity of Japanese Older Adults Who Own and Walk  
9 Dogs. *Am J Prev Med* 2012;**43**:429–33. doi:10.1016/j.amepre.2012.06.019  
10  
11  
12 21 Feng Z, Dibben C, Witham MD, *et al.* Dog ownership and physical activity in later life: A cross-  
13 sectional observational study. *Prev Med (Baltim)* 2014;**66**:101–6.  
14  
15  
16 doi:10.1016/j.yjmed.2014.06.004  
17  
18  
19 22 Wu YT, Luben R, Jones A. Dog ownership supports the maintenance of physical activity during  
20 poor weather in older English adults: Cross-sectional results from the EPIC Norfolk cohort. *J*  
21 *Epidemiol Community Health* 2017;**71**:905–11. doi:10.1136/jech-2017-208987  
22  
23  
24  
25 23 Arbillaga-Etxarri A, Gimeno-Santos E, Barberan-Garcia A, *et al.* Socio-environmental correlates  
26 of physical activity in patients with chronic obstructive pulmonary disease (COPD). *Thorax*  
27 2017;:thoraxjnl-2016-209209. doi:10.1136/thoraxjnl-2016-209209  
28  
29  
30  
31  
32 24 McConnell AR, Brown CM, Shoda TM, *et al.* Friends with benefits: On the positive  
33 consequences of pet ownership. *J Pers Soc Psychol* 2011;**101**:1239–52. doi:10.1037/a0024506  
34  
35  
36  
37 25 Headey B, Grabka MM. Pets and Human Health in Germany and Australia: National  
38 Longitudinal Results. *Soc Indic Res* 2007;**80**:297–311. doi:10.1007/s11205-005-5072-z  
39  
40  
41  
42 26 Mubanga M, Byberg L, Nowak C, *et al.* Dog ownership and the risk of cardiovascular disease  
43 and death – a nationwide cohort study. *Sci Rep* 2017;**7**:15821. doi:10.1038/s41598-017-16118-6  
44  
45  
46  
47 27 Parslow RA, Jorm AF. Pet ownership and risk factors for cardiovascular disease: another look.  
48 *Med J Aust* 2003;**179**:466–8.  
49  
50  
51 28 Saunders J, Parast L, Babey SH, *et al.* Exploring the differences between pet and non-pet owners:  
52 Implications for human-animal interaction research and policy. *PLoS One* 2017;**12**:e0179494.  
53  
54  
55  
56  
57 29 Torske MO, Krokstad S, Stamatakis E, *et al.* Dog ownership and all-cause mortality in a  
58 population cohort in Norway: The HUNT study. *PLoS One* 2017;**12**:e0179832.  
59  
60



- 1  
2  
3 doi:10.1371/journal.pone.0179832  
4  
5  
6 30 Richards EA. Does Dog Walking Predict Physical Activity Participation: Results From a National  
7 Survey. *Am J Health Promot* 2016;**30**:323–30. doi:10.1177/0890117116646335  
8  
9  
10 31 Richards EA, Ogata N, Cheng C-W. Evaluation of the Dogs, Physical Activity, and Walking  
11 (Dogs PAW) Intervention: A Randomized Controlled Trial. *Nurs Res* 2016;**65**:191–201.  
12  
13 doi:10.1097/NNR.0000000000000155  
14  
15  
16 32 Richards EA, McDonough MH, Edwards NE, *et al.* Psychosocial and environmental factors  
17 associated with dog-walking. *Int J Heal Promot Educ* 2013;**51**:198–211.  
18  
19 doi:10.1080/14635240.2013.802546  
20  
21  
22 33 Christian (nee Cutt) H, Giles-Corti B, Knuiman M. ‘I’m Just a’-Walking the Dog’ Correlates of  
23 Regular Dog Walking. *Fam Community Health* 2010;**33**:44–52.  
24  
25 doi:10.1097/FCH.0b013e3181c4e208  
26  
27  
28 34 Cutt H, Giles-Corti B, Knuiman M. Encouraging physical activity through dog walking: Why  
29 don’t some owners walk with their dog? *Prev Med (Baltim)* 2008;**46**:120–6.  
30  
31 doi:10.1016/j.ypmed.2007.08.015  
32  
33  
34 35 Schipperijn J, Stigsdotter UK, Randrup TB, *et al.* Influences on the use of urban green space – A  
36 case study in Odense, Denmark. *Urban For Urban Green* 2010;**9**:25–32.  
37  
38 doi:10.1016/j.ufug.2009.09.002  
39  
40  
41 42 Frumkin H, Bratman GN, Breslow SJ, *et al.* Nature Contact and Human Health: A Research  
43 Agenda. *Environ Health Perspect* 2017;**125**:75001. doi:10.1289/EHP1663  
44  
45  
46 47 Nieuwenhuijsen MJ, Khreis H, Triguero-Mas M, *et al.* Fifty shades of green. *Epidemiology*.  
48 2017;**28**:63–71. doi:10.1097/EDE.0000000000000549  
49  
50  
51 52 Markevych I, Schoierer J, Hartig T, *et al.* Exploring pathways linking greenspace to health:  
53 Theoretical and methodological guidance. *Environ Res* 2017;**158**:301–17.  
54  
55 doi:10.1016/j.envres.2017.06.028  
56  
57  
58 59 Brug J, Oenema A, Ferreira I. Theory, evidence and Intervention Mapping to improve behavior  
60

- 1  
2  
3 nutrition and physical activity interventions. *Int J Behav Nutr Phys Act* 2005;**2**:2.  
4  
5 doi:10.1186/1479-5868-2-2  
6  
7  
8 40 Stokols D. Establishing and maintaining healthy environments. Toward a social ecology of health  
9 promotion. *Am Psychol* 1992;**47**:6–22. <http://www.ncbi.nlm.nih.gov/pubmed/1539925> (accessed  
10 29 Oct2018).  
11  
12  
13  
14 41 Nieuwenhuijsen MJ, Kruize H, Gidlow C, *et al*. Positive health effects of the natural outdoor  
15 environment in typical populations in different regions in Europe (PHENOTYPE): a study  
16 programme protocol. *BMJ Open* 2014;**4**:e004951. doi:10.1136/bmjopen-2014-004951  
17  
18  
19  
20 42 Smith G, Cirach M, Swart W, *et al*. Characterisation of the natural environment: quantitative  
21 indicators across Europe. *Int J Health Geogr* 2017;**16**:16. doi:10.1186/s12942-017-0090-z  
22  
23  
24  
25 43 Oliver LN, Schuurman N, Hall AW. Comparing circular and network buffers to examine the  
26 influence of land use on walking for leisure and errands. *Int J Health Geogr* 2007;**6**:41.  
27  
28  
29  
30  
31  
32 44 Browning M, Lee K. Within What Distance Does ‘Greenness’ Best Predict Physical Health? A  
33 Systematic Review of Articles with GIS Buffer Analyses across the Lifespan. *Int J Environ Res*  
34  
35  
36  
37  
38  
39 45 Annerstedt van den Bosch M, Mudu P, Uscila V, *et al*. Development of an urban green space  
40 indicator and the public health rationale. *Scand J Public Health* 2016;**44**:159–67.  
41  
42  
43  
44  
45  
46 46 Weier J, Herring D. Measuring Vegetation (NDVI & EVI).  
47  
48  
49  
50  
51  
52 47 Dadvand P, Bartoll X, Basagaña X, *et al*. Green spaces and General Health: Roles of mental  
53 health status, social support, and physical activity. *Environ Int* 2016;**91**:161–7.  
54  
55  
56  
57  
58  
59 48 McEachan RRC, Prady SL, Smith G, *et al*. The association between green space and depressive  
60 symptoms in pregnant women: moderating roles of socioeconomic status and physical activity. *J*

- 1  
2  
3 *Epidemiol Community Health* 2016;**70**:253–9. doi:10.1136/jech-2015-205954  
4  
5  
6 49 Wendel-Vos GCW, Schuit AJ, Saris WHM, *et al.* Reproducibility and relative validity of the  
7 short questionnaire to assess health-enhancing physical activity. *J Clin Epidemiol* 2003;**56**:1163–  
8 9.http://www.ncbi.nlm.nih.gov/pubmed/14680666 (accessed 15 Jun2016).  
9  
10  
11  
12 50 van Poppel MNM, Chinapaw MJM, Mekkink LB, *et al.* Physical Activity Questionnaires for  
13 Adults. *Sport Med* 2010;**40**:565–600. doi:10.2165/11531930-000000000-00000  
14  
15  
16  
17 51 Ware JE, Sherbourne CD. The Mos 36-Item Short-Form Health Survey (Sf-36) .1. Conceptual-  
18 Framework and Item Selection. *Med Care* 1992;**30**:473–83. doi:10.1097/00005650-199206000-  
19 00002  
20  
21  
22  
23 52 Mavaddat N, Kinmonth AL, Sanderson S, *et al.* What determines Self-Rated Health (SRH)? A  
24 cross-sectional study of SF-36 health domains in the EPIC-Norfolk cohort. *J Epidemiol*  
25 *Community Heal* 2011;**65**:800–6. doi:10.1136/jech.2009.090845  
26  
27  
28  
29  
30 53 Kyffin RGE, Goldacre MJ, Gill M. Mortality rates and self reported health: database analysis by  
31 English local authority area. *BMJ* 2004;**329**:887–8. doi:10.1136/bmj.38238.508021.F7  
32  
33  
34  
35 54 Ware JE. SF-36 health survey update. *Spine (Phila Pa 1976)* 2000;**25**:3130–  
36 9.http://www.ncbi.nlm.nih.gov/pubmed/11124729 (accessed 6 Sep2017).  
37  
38  
39  
40 55 Domínguez-Berjón MF, Borrell C, Cano-Serral G, *et al.* [Constructing a deprivation index based  
41 on census data in large Spanish cities(the MEDEA project)]. *Gac Sanit* 2008;**22**:179–  
42 87.http://www.ncbi.nlm.nih.gov/pubmed/18579042 (accessed 11 Jul2017).  
43  
44  
45  
46 56 Statistics Netherlands. CBS - Kerncijfers wijken en buurten 2004-2013. Cent. Bur. voor Stat. Den  
47 Haag/Heerlen. 2013.http://www.cbs.nl/nl-NL/menu/themas/dossiers/nederland-  
48 regionaal/cijfers/incidenteel/maatwerk/wijk-buurtstatistieken/kwb-recent/default.htm  
49  
50  
51  
52 57 Statistics Lithuania. Population and Housing Census of the Republic of Lithuania, 2011. Vilnius:  
53 2013. https://osp.stat.gov.lt/documents/.../Report2011\_Population\_and\_Housing\_Census  
54  
55  
56  
57 58 Department for Communities and Local Government. English Indices of Deprivation 2010.  
58 2010.https://www.gov.uk/government/uploads/system/uploads/attachment\_data/file/6872/187152  
59  
60

- 1  
2  
3 4.xls  
4  
5  
6 59 Benjamini Y, Hochberg Y. Controlling the False Discovery Rate: A Practical and Powerful  
7 Approach to Multiple Testing. *J. R. Stat. Soc. Ser. B.* 1995;**57**:289–300. doi:10.2307/2346101  
8  
9  
10 60 StataCorp. Stata Statistical Software: Release 14. 2015.  
11  
12  
13 61 Wood L, Giles-Corti B, Bulsara M. The pet connection: pets as a conduit for social capital? *Soc*  
14 *Sci Med* 2005;**61**:1159–73. doi:10.1016/j.socscimed.2005.01.017  
15  
16  
17 62 Wood L, Martin K, Christian H, *et al.* Social capital and pet ownership – A tale of four cities.  
18 *SSM - Popul Heal* 2017;**3**:442–7. doi:10.1016/j.ssmph.2017.05.002  
19  
20  
21  
22 63 Dalton AM, Wareham N, Griffin S, *et al.* Neighbourhood greenspace is associated with a slower  
23 decline in physical activity in older adults: A prospective cohort study. *SSM - Popul Heal*  
24 2016;**2**:683–91. doi:10.1016/j.ssmph.2016.09.006  
25  
26  
27  
28  
29 64 Root ED, Silbernagel K, Litt JS. Unpacking healthy landscapes: Empirical assessment of  
30 neighborhood aesthetic ratings in an urban setting. *Landsc Urban Plan* 2017;**168**:38–47.  
31 doi:10.1016/J.LANDURBPLAN.2017.09.028  
32  
33  
34  
35  
36  
37  
38  
39  
40  
41  
42  
43  
44  
45  
46  
47  
48  
49  
50  
51  
52  
53  
54  
55  
56  
57  
58  
59  
60

Tables.

Table 1. Population characteristics by dog-ownership

|                                                        | Total<br>n=3586 | Non-dog-<br>owner<br>n=2478 | Dog owner<br>n=1108 | adjusted<br>p-value* |
|--------------------------------------------------------|-----------------|-----------------------------|---------------------|----------------------|
| Age, mean (SD)                                         | 51.4 (15.9)     | 51.3 (15.9)                 | 51.7 (16.0)         | 0.474                |
| Sex, n (females %)                                     | 1967 (54.9)     | 1314 (53.0)                 | 653 (58.9)          | 0.001                |
| Household composition, n (%)                           |                 |                             |                     | 0.001                |
| <i>alone</i>                                           | 614 (17.1)      | 461 (18.6)                  | 153 (13.8)          |                      |
| <i>with partner (without children)</i>                 | 1239 (34.5)     | 864 (34.9)                  | 375 (33.8)          |                      |
| <i>with children &lt;12 yr old</i>                     | 535 (14.9)      | 383 (15.5)                  | 152 (13.7)          |                      |
| <i>with children &gt;12 yr old</i>                     | 602 (16.8)      | 368 (14.9)                  | 234 (21.1)          |                      |
| <i>other</i>                                           | 597 (16.6)      | 402 (16.2)                  | 195 (17.6)          |                      |
| City, n (%)                                            |                 |                             |                     | 0.001                |
| <i>Barcelona</i>                                       | 979 (27.3)      | 790 (31.9)                  | 189 (17.1)          |                      |
| <i>Doetinchem</i>                                      | 851 (23.7)      | 668 (27.0)                  | 183 (16.5)          |                      |
| <i>Kaunas</i>                                          | 892 (24.9)      | 436 (17.6)                  | 456 (41.1)          |                      |
| <i>Stoke-on-Trent</i>                                  | 864 (24.1)      | 584 (23.6)                  | 280 (25.3)          |                      |
| Education, n (%)                                       |                 |                             |                     | 0.530                |
| <i>low</i>                                             | 251 (7.0)       | 163 (6.6)                   | 88 (7.9)            |                      |
| <i>medium</i>                                          | 1568 (43.7)     | 1087 (43.9)                 | 481 (43.5)          |                      |
| <i>high</i>                                            | 1767 (49.3)     | 1228 (49.6)                 | 539 (48.6)          |                      |
| Perceived income situation, n (%)                      |                 |                             |                     | 0.001                |
| <i>cannot make ends meet</i>                           | 385 (10.7)      | 276 (11.1)                  | 109 (9.8)           |                      |
| <i>enough to get by</i>                                | 1800 (50.2)     | 1165 (47.0)                 | 635 (57.3)          |                      |
| <i>comfortable</i>                                     | 1401 (39.1)     | 1037 (41.9)                 | 364 (32.9)          |                      |
| Weight status (BMI categories), n (%)                  |                 |                             |                     | 0.001                |
| <i>healthy weight</i>                                  | 1610 (44.9)     | 1165 (47.0)                 | 445 (40.2)          |                      |
| <i>overweight</i>                                      | 1192 (33.2)     | 819 (33.1)                  | 373 (33.6)          |                      |
| <i>obese</i>                                           | 784 (21.9)      | 494 (19.9)                  | 290 (26.2)          |                      |
| Physical constraint restricting mobility, n (%)        | 1003 (25.4)     | 536 (19.9)                  | 467 (37.3)          | 0.001                |
| One or more chronic diseases, n (%)                    | 1313 (36.6)     | 860 (34.7)                  | 453 (40.9)          | 0.001                |
| Smoking, n (%)                                         |                 |                             |                     | 0.020                |
| <i>current</i>                                         | 733 (20.5)      | 478 (19.3)                  | 255 (23.0)          |                      |
| <i>former</i>                                          | 1008 (28.1)     | 724 (29.2)                  | 284 (25.6)          |                      |
| <i>never</i>                                           | 1843 (51.4)     | 1275 (51.5)                 | 568 (51.3)          |                      |
| Frequency of contact with family and/or friends, n (%) |                 |                             |                     | 0.299                |
| <i>(almost) daily</i>                                  | 2135 (59.5)     | 1470 (59.3)                 | 665 (60.0)          |                      |
| <i>≥1 per week</i>                                     | 1114 (31.1)     | 781 (31.1)                  | 333 (30.0)          |                      |
| <i>1-3 per month or less</i>                           | 392 (9.4)       | 227 (9.2)                   | 111 (10.0)          |                      |
| Feeling part of a group of friends, n %                |                 |                             |                     | 0.001                |
| <i>(totally) agree</i>                                 | 2414 (67.5)     | 1754 (70.9)                 | 660 (59.7)          |                      |
| <i>neutral, (totally) disagree</i>                     | 1165 (32.5)     | 719 (29.1)                  | 446 (40.3)          |                      |
| Perceived safety of NOE in NBH, n (%)                  |                 |                             |                     | 0.016                |
| <i>(very) satisfied</i>                                | 2123 (59.2)     | 1486 (60.0)                 | 637 (57.5)          |                      |
| <i>neutral</i>                                         | 776 (21.6)      | 542 (21.9)                  | 234 (21.1)          |                      |
| <i>(very) dissatisfied</i>                             | 687 (19.2)      | 450 (18.2)                  | 237 (21.4)          |                      |
| NBH SES, n (%)                                         |                 |                             |                     | 0.474                |
| <i>low</i>                                             | 1131 (31.5)     | 791 (31.9)                  | 340 (30.7)          |                      |
| <i>medium</i>                                          | 1379 (38.4)     | 938 (37.9)                  | 441 (39.8)          |                      |
| <i>high</i>                                            | 1076 (30.0)     | 749 (30.2)                  | 327 (29.5)          |                      |

|                                                                        |                   |                   |                   |       |
|------------------------------------------------------------------------|-------------------|-------------------|-------------------|-------|
| Minutes/week walking (leisure), median (IQR)                           | 120 (300)         | 90 (240)          | 180 (420)         | 0.001 |
| Hours spent in NOE near home in last 4 wks, median (IQR)               | 4 (11.8)          | 3.75 (10)         | 10 (29.3)         | 0.001 |
| General health, n (%)                                                  |                   |                   |                   | 0.001 |
| <i>Excellent</i> , (very) good                                         | 2662 (74.2)       | 1939 (78.3)       | 723 (65.2)        |       |
| <i>(very) Bad</i>                                                      | 924 (25.8)        | 539 (21.8)        | 385 (34.8)        |       |
| Mental health (SF-36), mean (SD)                                       | 73.5 (16.3)       | 73.9 (16.2)       | 72.5 (16.3)       | 0.01  |
| Distance to nearest NOE (m), median (IQR)                              | 161.0 (214)       | 155.7 (205.6)     | 172.4 (232.4)     | 0.001 |
| Number of NOE in 300m NWB, median (IQR)                                | 1 (1)             | 1 (2)             | 1 (2)             | 0.001 |
| Number of NOE in 500m NWB, median (IQR)                                | 1 (1)             | 3 (3)             | 3 (3)             | 0.001 |
| Number of NOE in 1000m NWB, median (IQR)                               | 10 (10)           | 11 (10)           | 8 (10)            | 0.001 |
| Area of NOE in 300m NWB (m <sup>2</sup> ), median (IQR)                | 38,013 (136,092)  | 36,007 (132,239)  | 41,241 (154,377)  | 0.58  |
| Area of NOE in 500m NWB (m <sup>2</sup> ), median (IQR)                | 140,281 (286,917) | 137,862 (261,453) | 150,758 (402,966) | 0.03  |
| Area of NOE in 1000m NWB (m <sup>2</sup> ), median (IQR)               | 588,516 (975,551) | 557,191 (890,303) | 720,366 (239,293) | 0.001 |
| Distance to nearest NOE (m), median (IQR)                              | 161.0 (214)       | 155.7 (205.6)     | 172.4 (232.4)     | 0.001 |
| Average residential surrounding greenness in 100m buffer, median (IQR) | 0.46 (0.16)       | 0.44 (0.28)       | 0.50 (0.16)       | 0.001 |
| Average residential surrounding greenness in 300m buffer, median (IQR) | 0.49 (0.23)       | 0.47 (0.30)       | 0.51 (0.13)       | 0.001 |
| Average residential surrounding greenness in 500m buffer, median (IQR) | 0.49 (0.23)       | 0.48 (0.31)       | 0.51 (0.11)       | 0.001 |

NOE= natural outdoor environments; NBH= neighborhood; NWB= network buffer; IQR= interquartile range; SD= standard deviation; BMI= body mass index; SES= socioeconomic status. \* based on t-tests, Chi-square, Kruskal-Wallis, and rank-sum tests and with p-values adjusted for the false discovery rate with the Benjamini-Hochberg Procedure.

Table 2. Associations between dog-ownership, leisure time walking, time spent in NOE near the home, general health status and mental health.

|                         | Leisure time walking<br>(high vs. low) | Time spent in NOE near home (high vs. low) | General health, excellent, (very) good<br>(reference: fair, poor) | Mental health (scale 0-100, higher is better) |
|-------------------------|----------------------------------------|--------------------------------------------|-------------------------------------------------------------------|-----------------------------------------------|
| Dog ownership (vs. not) | OR (95% CI)                            | OR (95% CI)                                | OR (95% CI)                                                       | $\beta$ (95% CI)                              |
| Total                   | 2.17 (1.86; 2.54) n=3586               | 2.37 (2.02; 2.79) n=3530                   | 0.92 (0.73; 1.15) n=3586                                          | 0.24 (-0.89; 1.37) n=3584                     |
| Barcelona               | 1.46 (1.03; 2.08) n=979                | 2.14 (1.47; 3.13) n=978                    | 1.90 (1.01; 3.56) n=979                                           | 0.13 (-2.29; 2.55) n=979                      |
| Doetinchem              | 7.97 (5.18; 12.25) n=851               | 1.18 (0.80; 1.73) n=846                    | 0.89 (0.37; 2.17) n=851                                           | 1.61 (-0.55; 3.78) n=849                      |
| Kaunas                  | 1.05 (0.79; 1.39) n=892                | 1.26 (0.93; 1.69) n=844                    | 0.71 (0.50; 1.00) n=892                                           | -2.17 (-4.40; 0.06) n=892                     |
| Stoke-on-Trent          | 2.01 (1.44; 2.79) n=864                | 2.31 (1.63; 3.27) n=862                    | 0.89 (0.57; 1.37) n=864                                           | 2.61 (0.35; 4.86) n=864                       |

NOE= natural outdoor environments; OR= odds ratio; CI= confidence interval

*Analytical method: mixed models with random intercept for neighborhoods and adjusted for age, sex, education, neighborhood SES, household composition, perceived income situation, perceived NOE safety, physical constraint restricting mobility, and chronic diseases. Analyses were based on complete cases.*

Table 3. Associations between dog-ownership, walking, time in NOE, perceived general and mental health status stratified by access to NOE and residential surrounding greenness.

|                                          |              | Leisure time walking (high vs. low) | Time spent in NOE near home (high vs. low) | General health, excellent, (very) good (reference: fair, poor) | Mental health (scale 0-100, higher is better) |
|------------------------------------------|--------------|-------------------------------------|--------------------------------------------|----------------------------------------------------------------|-----------------------------------------------|
| Dog ownership (vs. not)                  |              | OR (95% CI)                         | OR (95% CI)                                | OR (95% CI)                                                    | $\beta$ (95% CI)                              |
| Number of NOE (500m)                     | lowest       | 2.13 (1.74; 2.62) n=2084            | 2.57 (2.07; 3.17) n=2051                   | 0.89 (0.65; 1.22) n=2084                                       | 0.55 (-0.93; 2.03) n=2082                     |
|                                          | highest      | 2.29 (1.79; 2.94) n=1502            | 2.23 (1.72; 2.89) n=1479                   | 0.90 (0.62; 1.29) n=1502                                       | -0.62 (-2.36; 1.13) n=1502                    |
| Area of NOE (500m)                       | lowest       | 2.36 (1.88; 2.97) n=1779            | 2.53 (2.00; 3.20) n=1753                   | 0.90 (0.64; 1.27) n=1779                                       | 0.85 (-0.83; 2.53) n=1777                     |
|                                          | highest      | 2.04 (1.64; 2.53) n=1807            | 2.19 (1.75; 2.75) n=1777                   | 0.81 (0.59; 1.12) n=1807                                       | -0.48 (-1.20; 1.04) n=1807                    |
| Distance to nearest NOE                  | $\leq 300$ m | 2.36 (1.97; 2.83) n=2778            | 2.64 (2.18; 3.20) n=2746                   | 0.91 (0.69; 1.20) n=2778                                       | 0.66 (-0.61; 1.93) n=2776                     |
|                                          | $> 300$ m    | 1.86 (1.36; 2.55) n=808             | 1.82 (1.31; 2.55) n=784                    | 0.70 (0.46; 1.05) n=808                                        | -1.05 (-3.45; 1.36) n=808                     |
| Residential surrounding greenness (500m) | lowest       | 2.15 (1.70; 2.71) n=1786            | 2.29 (1.81; 2.91) n=1765                   | 0.86 (0.61; 1.21) n=1786                                       | 0.38 (-1.29; 2.05) n=1785                     |
|                                          | highest      | 2.19 (1.77; 2.72) n=1800            | 2.57 (2.04; 3.24) n=1765                   | 0.95 (0.68; 1.33) n=1800                                       | -0.16 (-1.69; 1.36) n=1799                    |

NOE= natural outdoor environments; OR= odds ratio; CI= confidence interval. *Analytical method: mixed models with random intercept for neighborhoods and adjusted for age, sex, education, neighborhood SES, household composition, perceived income situation, perceived NOE safety, physical constraint restricting mobility, and chronic diseases. Analyses were based on complete cases.*





Figure 1. Example of different buffer types and the distance to natural outdoor environments from a residential address.

## Supplemental Material Zijlema et al - Dog ownership, the natural outdoor environment and health: a cross-sectional study

Supplemental Table S1. Full model results of associations between dog-ownership, leisure time walking, time spent in NOE near the home, general health status and mental health.

|                                                        | Leisure time walking<br>(high vs. low) | Time spent in NOE<br>near home (high vs. low) | General health, excellent,<br>(very) good (reference: fair,<br>poor) | Mental health<br>(scale 0-100,<br>higher is better) |
|--------------------------------------------------------|----------------------------------------|-----------------------------------------------|----------------------------------------------------------------------|-----------------------------------------------------|
|                                                        | OR (95% CI)                            | OR (95% CI)                                   | OR (95% CI)                                                          | $\beta$ (95% CI)                                    |
| Dog ownership (vs. not)                                | 2.17 (1.86; 2.54)                      | 2.37 (2.02; 2.79)                             | 0.92 (0.73; 1.15)                                                    | 0.24 (-0.89; 1.37)                                  |
| Female sex                                             | 1.15 (1.00; 1.32)                      | 0.88 (0.76; 1.01)                             | 1.12 (0.91; 1.38)                                                    | -2.07 (-3.08; -1.07)                                |
| Age (per 10 years)                                     | 1.13 (1.07; 1.00)                      | 1.18 (1.11; 1.26)                             | 0.75 (0.68; 0.82)                                                    | 0.70 (0.29; 1.12)                                   |
| Household composition (vs. alone)                      |                                        |                                               |                                                                      |                                                     |
| <i>with partner (without children)</i>                 | 1.04 (0.84; 1.28)                      | 0.99 (0.80; 1.24)                             | 1.01 (0.75; 1.37)                                                    | 1.36 (-0.13; 2.85)                                  |
| <i>with children &lt;12 yr old</i>                     | 0.87 (0.66; 1.14)                      | 1.55 (1.18; 2.05)                             | 0.88 (0.57; 1.36)                                                    | 2.86 (0.95; 4.76)                                   |
| <i>with children &gt;12 yr old</i>                     | 0.88 (0.69; 1.13)                      | 1.12 (0.87; 1.44)                             | 1.00 (0.70; 1.45)                                                    | 1.77 (0.05; 3.49)                                   |
| <i>other</i>                                           | 0.99 (0.76; 1.29)                      | 1.31 (0.99; 1.74)                             | 0.57 (0.39; 0.85)                                                    | 1.16 (-0.75; 3.07)                                  |
| <b>p for trend</b>                                     | <b>0.420</b>                           | <b>0.051</b>                                  | <b>0.017</b>                                                         | <b>0.228</b>                                        |
| Education (vs. low)                                    |                                        |                                               |                                                                      |                                                     |
| <i>medium</i>                                          | 1.72 (1.26; 2.36)                      | 1.41 (1.02; 1.95)                             | 0.99 (0.65; 1.49)                                                    | 3.70 (1.55; 5.84)                                   |
| <i>high</i>                                            | 2.12 (1.54; 2.93)                      | 1.15 (0.85; 1.54)                             | 1.26 (0.81; 1.97)                                                    | 4.91 (2.69; 7.12)                                   |
| <b>p for trend</b>                                     | <b>&lt;0.001</b>                       | <b>0.192</b>                                  | <b>0.052</b>                                                         | <b>&lt;0.001</b>                                    |
| Perceived income situation (vs. cannot make ends meet) |                                        |                                               |                                                                      |                                                     |
| <i>enough to get by</i>                                | 0.79 (0.62; 1.00)                      | 1.12 (0.63; 1.08)                             | 1.67 (1.19; 2.35)                                                    | 2.92 (1.22; 4.63)                                   |
| <i>comfortable</i>                                     | 0.88 (0.68; 1.13)                      | 1.15 (0.89; 1.50)                             | 5.00 (3.40; 7.36)                                                    | 8.06 (6.26; 9.86)                                   |
| <b>p for trend</b>                                     | <b>0.925</b>                           | <b>0.401</b>                                  | <b>&lt;0.001</b>                                                     | <b>&lt;0.001</b>                                    |
| Physical constraint restricting mobility (vs. not)     | 1.04 (0.88; 1.25)                      | 0.90 (0.75; 1.09)                             | 0.48 (0.39; 0.61)                                                    | -0.86 (-2.14; 0.41)                                 |
| One or more chronic diseases (vs. not)                 | 1.19 (1.01; 1.40)                      | 0.85 (0.72; 1.01)                             | 0.18 (0.14; 0.22)                                                    | -4.16 (-5.34; -2.98)                                |
| Perceived safety of NOE in NBH (vs. very satisfied)    |                                        |                                               |                                                                      |                                                     |
| <i>satisfied</i>                                       | 1.10 (0.85; 1.44)                      | 0.83 (0.63; 1.08)                             | 1.01 (0.66; 1.56)                                                    | -2.47 (-4.33; -0.61)                                |
| <i>neutral</i>                                         | 1.10 (0.83; 1.48)                      | 0.68 (0.51; 0.92)                             | 0.72 (0.46; 1.15)                                                    | -4.65 (-6.70; -2.61)                                |
| <i>dissatisfied</i>                                    | 1.31 (0.97; 1.78)                      | 0.74 (0.54; 1.01)                             | 0.61 (0.38; 0.97)                                                    | -5.45 (-7.62; -3.28)                                |
| <i>very dissatisfied</i>                               | 1.45 (0.92; 2.30)                      | 0.73 (0.45; 1.17)                             | 0.70 (0.36; 1.37)                                                    | -6.01 (-9.28; -2.73)                                |
| <b>p for trend</b>                                     | <b>0.037</b>                           | <b>0.032</b>                                  | <b>0.001</b>                                                         | <b>&lt;0.001</b>                                    |
| NBH SES (vs. low)                                      |                                        |                                               |                                                                      |                                                     |
| <i>medium</i>                                          | 1.08 (0.87; 1.34)                      | 1.05 (0.79; 1.39)                             | 0.92 (0.45; 1.88)                                                    | -0.49 (-2.63; 1.64)                                 |
| <i>high</i>                                            | 1.24 (0.99; 1.55)                      | 1.15 (0.85; 1.54)                             | 0.96 (0.46; 1.99)                                                    | 0.89 (-1.33; 3.10)                                  |
| <b>p for trend</b>                                     | <b>0.055</b>                           | <b>0.382</b>                                  | <b>0.944</b>                                                         | <b>0.353</b>                                        |

NOE= natural outdoor environments; OR= odds ratio; CI= confidence interval; NBH= neighborhood; SES= socioeconomic status. Analytical method: mixed models with random intercept for neighborhoods and adjusted for age, sex, education, neighborhood SES, household composition, perceived income situation, perceived NOE safety, physical constraint restricting mobility, and chronic diseases. Analyses were based on complete cases.

Supplemental Material Zijlema et al - Dog ownership, the natural outdoor environment and health: a cross-sectional study

Supplemental Table S2. Associations between dog-ownership, walking, time in NOE, perceived general and mental health status stratified by access to NOE and residential surrounding greenness

| Dog ownership (vs. not)      | Leisure time walking (high vs. low) | Time spent in NOE near home (high vs. low) | General health, excellent, (very) good (reference: fair, poor) | Mental health (scale 0-100, higher is better) |                            |
|------------------------------|-------------------------------------|--------------------------------------------|----------------------------------------------------------------|-----------------------------------------------|----------------------------|
|                              | OR (95% CI)                         | OR (95% CI)                                | OR (95% CI)                                                    | $\beta$ (95% CI)                              |                            |
| Number of NOE                | 300m                                |                                            |                                                                |                                               |                            |
|                              | lowest                              | 2.11 (1.76; 2.54) n=2141                   | 2.42 (1.99; 2.94) n=2368                                       | 0.87 (0.66; 1.15) n=2414                      | 0.37 (-0.99; 1.73) n=2412  |
|                              | highest                             | 2.36 (1.77; 3.15) n=1172                   | 2.32 (1.73; 3.12) n=1162                                       | 0.84 (0.54; 1.29) n=1172                      | 0.38 (-1.62; 2.39) n=1172  |
|                              | 1000m                               |                                            |                                                                |                                               |                            |
|                              | lowest                              | 2.17 (1.75; 2.69) n=1869                   | 2.47 (1.98; 3.09) n=1843                                       | 0.85 (0.61; 1.18) n=1869                      | -0.72 (-2.24; 0.81) n=1867 |
|                              | highest                             | 2.20 (1.75; 2.76) n=1717                   | 2.32 (1.82; 2.95) n=1687                                       | 0.87 (0.63; 1.22) n=1717                      | 0.68 (-0.98; 2.34) n=1717  |
| Area of NOE                  | 300m                                |                                            |                                                                |                                               |                            |
|                              | lowest                              | 2.24 (1.80; 2.79) n=1832                   | 2.34 (1.87; 2.94) n=1801                                       | 0.78 (0.56; 1.08) n=1832                      | -0.30 (-1.90; 1.30) n=1830 |
|                              | highest                             | 2.15 (1.72; 2.70) n=1754                   | 2.43 (1.92; 3.08) n=1729                                       | 0.92 (0.65; 1.28) n=1754                      | 0.61 (-0.97; 2.20) n=1754  |
|                              | 1000m                               |                                            |                                                                |                                               |                            |
|                              | lowest                              | 2.19 (1.74; 2.77) n=1799                   | 2.31 (1.83; 2.92) n=1777                                       | 0.74 (0.53; 1.03) n=1799                      | -0.80 (-2.46; 0.87) n=1797 |
|                              | highest                             | 2.18 (1.76; 2.71) n=1787                   | 2.44 (1.94; 3.07) n=1753                                       | 0.94 (0.67; 1.30) n=1787                      | 0.65 (-0.88; 2.18) n=1787  |
| Surrounding greenness (NDVI) | 100m                                |                                            |                                                                |                                               |                            |
|                              | lowest                              | 2.10 (1.67; 2.63) n=1797                   | 2.47 (1.96; 3.12) n=1769                                       | 0.74 (0.53; 1.03) n=1797                      | 0.23 (-1.42; 1.89) n=1796  |
|                              | highest                             | 2.26 (1.81; 2.81) n=1789                   | 2.32 (1.84; 2.92) n=1761                                       | 0.95 (0.68; 1.33) n=1789                      | -0.06 (-1.59; 1.47) n=1788 |
|                              | 300m                                |                                            |                                                                |                                               |                            |
|                              | lowest                              | 1.95 (1.56; 2.44) n=1786                   | 2.33 (1.84; 2.95) n=1757                                       | 0.77 (0.54; 1.09) n=1786                      | 0.43 (-1.25; 2.10) n=1785  |
|                              | highest                             | 2.44 (1.96; 3.04) n=1800                   | 2.50 (1.99; 3.16) n=1773                                       | 0.98 (0.71; 1.36) n=1800                      | -0.11 (-1.62; 1.41) n=1799 |

NOE= natural outdoor environments; OR= odds ratio; CI= confidence interval; NDVI= normalized difference vegetation index. Analytical method: mixed models with random intercept for neighborhoods and adjusted for age, sex, education, neighborhood SES, household composition, perceived income situation, perceived NOE safety, physical constraint restricting mobility, and chronic diseases. Analyses were based on complete cases.

## STROBE Statement—checklist of items that should be included in reports of observational studies

|                          | Item No | Recommendation                                                                                                                                                                                                                                                                                                                                                                                                                                                         | Appears in manuscript on page |
|--------------------------|---------|------------------------------------------------------------------------------------------------------------------------------------------------------------------------------------------------------------------------------------------------------------------------------------------------------------------------------------------------------------------------------------------------------------------------------------------------------------------------|-------------------------------|
| Title and abstract       | 1       | (a) Indicate the study's design with a commonly used term in the title or the abstract                                                                                                                                                                                                                                                                                                                                                                                 | 1, 3                          |
|                          |         | (b) Provide in the abstract an informative and balanced summary of what was done and what was found                                                                                                                                                                                                                                                                                                                                                                    | 3,4                           |
| <b>Introduction</b>      |         |                                                                                                                                                                                                                                                                                                                                                                                                                                                                        |                               |
| Background/rationale     | 2       | Explain the scientific background and rationale for the investigation being reported                                                                                                                                                                                                                                                                                                                                                                                   | 6                             |
| Objectives               | 3       | State specific objectives, including any prespecified hypotheses                                                                                                                                                                                                                                                                                                                                                                                                       | 6                             |
| <b>Methods</b>           |         |                                                                                                                                                                                                                                                                                                                                                                                                                                                                        |                               |
| Study design             | 4       | Present key elements of study design early in the paper                                                                                                                                                                                                                                                                                                                                                                                                                | 7                             |
| Setting                  | 5       | Describe the setting, locations, and relevant dates, including periods of recruitment, exposure, follow-up, and data collection                                                                                                                                                                                                                                                                                                                                        | 7-10                          |
| Participants             | 6       | (a) <i>Cohort study</i> —Give the eligibility criteria, and the sources and methods of selection of participants. Describe methods of follow-up<br><i>Case-control study</i> —Give the eligibility criteria, and the sources and methods of case ascertainment and control selection. Give the rationale for the choice of cases and controls<br><i>Cross-sectional study</i> —Give the eligibility criteria, and the sources and methods of selection of participants | 7                             |
|                          |         | (b) <i>Cohort study</i> —For matched studies, give matching criteria and number of exposed and unexposed<br><i>Case-control study</i> —For matched studies, give matching criteria and the number of controls per case                                                                                                                                                                                                                                                 | n.a.                          |
| Variables                | 7       | Clearly define all outcomes, exposures, predictors, potential confounders, and effect modifiers. Give diagnostic criteria, if applicable                                                                                                                                                                                                                                                                                                                               | 7-10                          |
| Data sources/measurement | 8*      | For each variable of interest, give sources of data and details of methods of assessment (measurement). Describe comparability of assessment methods if there is more than one group                                                                                                                                                                                                                                                                                   | 7-10                          |
| Bias                     | 9       | Describe any efforts to address potential sources of bias                                                                                                                                                                                                                                                                                                                                                                                                              | 7-11                          |
| Study size               | 10      | Explain how the study size was arrived at                                                                                                                                                                                                                                                                                                                                                                                                                              | 7                             |
| Quantitative variables   | 11      | Explain how quantitative variables were handled in the analyses. If applicable, describe which groupings were chosen and why                                                                                                                                                                                                                                                                                                                                           | 7-10                          |
| Statistical methods      | 12      | (a) Describe all statistical methods, including those used to control for confounding                                                                                                                                                                                                                                                                                                                                                                                  | 10-11                         |
|                          |         | (b) Describe any methods used to examine subgroups and interactions                                                                                                                                                                                                                                                                                                                                                                                                    | 10-11                         |
|                          |         | (c) Explain how missing data were addressed                                                                                                                                                                                                                                                                                                                                                                                                                            | 10                            |
|                          |         | (d) <i>Cohort study</i> —If applicable, explain how loss to follow-up was addressed<br><i>Case-control study</i> —If applicable, explain how matching of                                                                                                                                                                                                                                                                                                               | 10-11                         |

|                          |     |                                                                                                                                                                                                              |                                      |
|--------------------------|-----|--------------------------------------------------------------------------------------------------------------------------------------------------------------------------------------------------------------|--------------------------------------|
|                          |     | cases and controls was addressed                                                                                                                                                                             |                                      |
|                          |     | <i>Cross-sectional study</i> —If applicable, describe analytical methods taking account of sampling strategy                                                                                                 |                                      |
|                          |     | (e) Describe any sensitivity analyses                                                                                                                                                                        | 10-11                                |
| <b>Results</b>           |     |                                                                                                                                                                                                              | <b>Appears in manuscript on page</b> |
| Participants             | 13* | (a) Report numbers of individuals at each stage of study—eg numbers potentially eligible, examined for eligibility, confirmed eligible, included in the study, completing follow-up, and analysed            | -                                    |
|                          |     | (b) Give reasons for non-participation at each stage                                                                                                                                                         | -                                    |
|                          |     | (c) Consider use of a flow diagram                                                                                                                                                                           | -                                    |
| Descriptive data         | 14* | (a) Give characteristics of study participants (eg demographic, clinical, social) and information on exposures and potential confounders                                                                     | 11                                   |
|                          |     | (b) Indicate number of participants with missing data for each variable of interest                                                                                                                          | -                                    |
|                          |     | (c) <i>Cohort study</i> —Summarise follow-up time (eg, average and total amount)                                                                                                                             | n.a.                                 |
| Outcome data             | 15* | <i>Cohort study</i> —Report numbers of outcome events or summary measures over time                                                                                                                          | n.a.                                 |
|                          |     | <i>Case-control study</i> —Report numbers in each exposure category, or summary measures of exposure                                                                                                         | n.a.                                 |
|                          |     | <i>Cross-sectional study</i> —Report numbers of outcome events or summary measures                                                                                                                           | Table 1                              |
| Main results             | 16  | (a) Give unadjusted estimates and, if applicable, confounder-adjusted estimates and their precision (eg, 95% confidence interval). Make clear which confounders were adjusted for and why they were included | Tables, 11-12                        |
|                          |     | (b) Report category boundaries when continuous variables were categorized                                                                                                                                    | Tables, 7-10                         |
|                          |     | (c) If relevant, consider translating estimates of relative risk into absolute risk for a meaningful time period                                                                                             | n.a.                                 |
| Other analyses           | 17  | Report other analyses done—eg analyses of subgroups and interactions, and sensitivity analyses                                                                                                               | Tables, 12-13                        |
| <b>Discussion</b>        |     |                                                                                                                                                                                                              |                                      |
| Key results              | 18  | Summarise key results with reference to study objectives                                                                                                                                                     | 13                                   |
| Limitations              | 19  | Discuss limitations of the study, taking into account sources of potential bias or imprecision. Discuss both direction and magnitude of any potential bias                                                   | 14                                   |
| Interpretation           | 20  | Give a cautious overall interpretation of results considering objectives, limitations, multiplicity of analyses, results from similar studies, and other relevant evidence                                   | 13-14                                |
| Generalisability         | 21  | Discuss the generalisability (external validity) of the study results                                                                                                                                        | 13-14                                |
| <b>Other information</b> |     |                                                                                                                                                                                                              |                                      |
| Funding                  | 22  | Give the source of funding and the role of the funders for the present study and, if applicable, for the original study on which the present article is based                                                | 4-5                                  |

1  
2  
3 \*Give information separately for cases and controls in case-control studies and, if applicable, for exposed and  
4 unexposed groups in cohort and cross-sectional studies.  
5

6 **Note:** An Explanation and Elaboration article discusses each checklist item and gives methodological background and  
7 published examples of transparent reporting. The STROBE checklist is best used in conjunction with this article (freely  
8 available on the Web sites of PLoS Medicine at <http://www.plosmedicine.org/>, Annals of Internal Medicine at  
9 <http://www.annals.org/>, and Epidemiology at <http://www.epidem.com/>). Information on the STROBE Initiative is  
10 available at [www.strobe-statement.org](http://www.strobe-statement.org).  
11  
12  
13  
14  
15  
16  
17  
18  
19  
20  
21  
22  
23  
24  
25  
26  
27  
28  
29  
30  
31  
32  
33  
34  
35  
36  
37  
38  
39  
40  
41  
42  
43  
44  
45  
46  
47  
48  
49  
50  
51  
52  
53  
54  
55  
56  
57  
58  
59  
60
